# Supplementary material for: Chemical Compositions of Eupatorium heterophyllum Leaf Samples from Yunnan and Sichuan Provinces of China—Isolation of 13 New Sesquiterpene Lactones
Source: MDPI journal article supplement (doi:10.3390/molecules28135107), 2023-06-29

# Index

|                                                                                                                             |    |
|-----------------------------------------------------------------------------------------------------------------------------|----|
| <b>Table S1.</b> LC-HR-MS data for the characteristic compounds. ....                                                       | 1  |
| <b>Figure S1.</b> LC-MS profiles of samples 7 (2015-70) in negative ion mode.....                                           | 2  |
| <b>Figure S2.</b> LC-MS profiles of samples 8 (2015-71) in negative ion mode.....                                           | 4  |
| <b>Figure S3.</b> <sup>1</sup> H NMR spectrum of <b>10</b> (measured in CDCl <sub>3</sub> , 500 MHz).....                   | 6  |
| <b>Figure S4.</b> <sup>13</sup> C NMR spectrum of <b>10</b> (measured in CDCl <sub>3</sub> , 126 MHz). ....                 | 7  |
| <b>Figure S5.</b> <sup>1</sup> H- <sup>1</sup> H COSY spectrum of <b>10</b> (measured in CDCl <sub>3</sub> , 500 MHz).....  | 8  |
| <b>Figure S6.</b> HSQC spectrum of <b>10</b> (measured in CDCl <sub>3</sub> , 500 MHz).....                                 | 9  |
| <b>Figure S7.</b> HMBC spectrum of <b>10</b> (measured in CDCl <sub>3</sub> , 500 MHz).....                                 | 10 |
| <b>Figure S8.</b> NOESY spectrum of <b>10</b> (measured in CDCl <sub>3</sub> , 500 MHz).....                                | 11 |
| <b>Figure S9.</b> <sup>1</sup> H NMR spectrum of <b>17</b> (measured in CDCl <sub>3</sub> , 500 MHz).....                   | 12 |
| <b>Figure S10.</b> <sup>13</sup> C NMR spectrum of <b>17</b> (measured in CDCl <sub>3</sub> , 126 MHz). ....                | 13 |
| <b>Figure S11.</b> <sup>1</sup> H- <sup>1</sup> H COSY spectrum of <b>17</b> (measured in CDCl <sub>3</sub> , 500 MHz)..... | 14 |
| <b>Figure S12.</b> HSQC spectrum of <b>17</b> (measured in CDCl <sub>3</sub> , 500 MHz).....                                | 15 |
| <b>Figure S13.</b> HMBC spectrum of <b>17</b> (measured in CDCl <sub>3</sub> , 500 MHz). ....                               | 16 |
| <b>Figure S14.</b> NOESY spectrum of <b>17</b> (measured in CDCl <sub>3</sub> , 500 MHz).....                               | 17 |
| <b>Figure S15.</b> <sup>1</sup> H NMR spectrum of <b>18</b> (measured in CDCl <sub>3</sub> , 500 MHz). ....                 | 18 |
| <b>Figure S16.</b> <sup>13</sup> C NMR spectrum of <b>18</b> (measured in CDCl <sub>3</sub> , 126 MHz). ....                | 19 |

|                                                                                                                          |    |
|--------------------------------------------------------------------------------------------------------------------------|----|
| <b>Figure S17.</b> $^1\text{H}$ - $^1\text{H}$ COSY spectrum of <b>18</b> (measured in $\text{CDCl}_3$ , 500 MHz). ..... | 20 |
| <b>Figure S18.</b> HSQC spectrum of <b>18</b> (measured in $\text{CDCl}_3$ , 500 MHz).....                               | 21 |
| <b>Figure S19.</b> HMBC spectrum of <b>18</b> (measured in $\text{CDCl}_3$ , 500 MHz). .....                             | 22 |
| <b>Figure S20.</b> NOESY spectrum of <b>18</b> (measured in $\text{CDCl}_3$ , 500 MHz).....                              | 23 |
| <b>Figure S21.</b> $^1\text{H}$ NMR spectrum of <b>24</b> (measured in $\text{CDCl}_3$ , 500 MHz). .....                 | 24 |
| <b>Figure S22.</b> $^{13}\text{C}$ NMR spectrum of <b>24</b> (measured in $\text{CDCl}_3$ , 126 MHz). .....              | 25 |
| <b>Figure S23.</b> $^1\text{H}$ - $^1\text{H}$ COSY spectrum of <b>24</b> (measured in $\text{CDCl}_3$ , 500 MHz). ..... | 26 |
| <b>Figure S24.</b> HSQC spectrum of <b>24</b> (measured in $\text{CDCl}_3$ , 500 MHz).....                               | 27 |
| <b>Figure S25.</b> HMBC spectrum of <b>24</b> (measured in $\text{CDCl}_3$ , 500 MHz). .....                             | 28 |
| <b>Figure S26.</b> NOESY spectrum of <b>24</b> (measured in $\text{CDCl}_3$ , 500 MHz).....                              | 29 |
| <b>Figure S27.</b> $^1\text{H}$ NMR spectrum of <b>31</b> (measured in $\text{CDCl}_3$ , 500 MHz). .....                 | 30 |
| <b>Figure S28.</b> $^{13}\text{C}$ NMR spectrum of <b>31</b> (measured in $\text{CDCl}_3$ , 126 MHz). .....              | 31 |
| <b>Figure S29.</b> $^1\text{H}$ - $^1\text{H}$ COSY spectrum of <b>31</b> (measured in $\text{CDCl}_3$ , 500 MHz). ..... | 32 |
| <b>Figure S30.</b> HSQC spectrum of <b>31</b> (measured in $\text{CDCl}_3$ , 500 MHz).....                               | 33 |
| <b>Figure S31.</b> HMBC spectrum of <b>31</b> (measured in $\text{CDCl}_3$ , 500 MHz). .....                             | 34 |
| <b>Figure S32.</b> NOESY spectrum of <b>31</b> (measured in $\text{CDCl}_3$ , 500 MHz).....                              | 35 |
| <b>Figure S33.</b> $^1\text{H}$ NMR spectrum of <b>36</b> (measured in $\text{CDCl}_3$ , 500 MHz, 298 K).....            | 36 |
| <b>Figure S34.</b> $^1\text{H}$ NMR spectrum of <b>36</b> (measured in $\text{CDCl}_3$ , 400 MHz, 233 K).....            | 37 |

|                                                                                                                               |    |
|-------------------------------------------------------------------------------------------------------------------------------|----|
| <b>Figure S35.</b> $^{13}\text{C}$ NMR spectrum of <b>36</b> (measured in $\text{CDCl}_3$ , 100 MHz, 233 K). .....            | 38 |
| <b>Figure S36.</b> $^1\text{H}$ - $^1\text{H}$ COSY spectrum of <b>36</b> (measured in $\text{CDCl}_3$ , 400 MHz, 233 K)..... | 39 |
| <b>Figure S37.</b> HSQC spectrum of <b>36</b> (measured in $\text{CDCl}_3$ , 400 MHz, 233 K).....                             | 40 |
| <b>Figure S38.</b> HMBC spectrum of <b>36</b> (measured in $\text{CDCl}_3$ , 400 MHz, 233 K).....                             | 41 |
| <b>Figure S39.</b> NOESY spectrum of <b>36</b> (measured in $\text{CDCl}_3$ , 400 MHz, 233 K).....                            | 42 |
| <b>Figure S40.</b> $^1\text{H}$ NMR spectrum of <b>40</b> (measured in $\text{CDCl}_3$ , 500 MHz, 298 K).....                 | 43 |
| <b>Figure S41.</b> $^1\text{H}$ NMR spectrum of <b>40</b> (measured in $\text{CDCl}_3$ , 400 MHz, 233 K).....                 | 44 |
| <b>Figure S42.</b> $^1\text{H}$ - $^1\text{H}$ COSY spectrum of <b>40</b> (measured in $\text{CDCl}_3$ , 400 MHz, 233 K)..... | 45 |
| <b>Figure S43.</b> $^1\text{H}$ NMR spectrum of <b>45</b> (measured in $\text{CDCl}_3$ , 500 MHz). .....                      | 46 |
| <b>Figure S44.</b> $^{13}\text{C}$ NMR spectrum of <b>45</b> (measured in $\text{CDCl}_3$ , 126 MHz). .....                   | 47 |
| <b>Figure S45.</b> $^1\text{H}$ - $^1\text{H}$ COSY spectrum of <b>45</b> (measured in $\text{CDCl}_3$ , 500 MHz). .....      | 48 |
| <b>Figure S46.</b> HSQC spectrum of <b>45</b> (measured in $\text{CDCl}_3$ , 500 MHz).....                                    | 49 |
| <b>Figure S47.</b> HMBC spectrum of <b>45</b> (measured in $\text{CDCl}_3$ , 500 MHz). .....                                  | 50 |
| <b>Figure S48.</b> NOESY spectrum of <b>45</b> (measured in $\text{CDCl}_3$ , 500 MHz).....                                   | 51 |
| <b>Figure S49.</b> $^1\text{H}$ NMR spectrum of <b>50</b> (measured in $\text{CDCl}_3$ , 500 MHz). .....                      | 52 |
| <b>Figure S50.</b> $^{13}\text{C}$ NMR spectrum of <b>50</b> (measured in $\text{CDCl}_3$ , 126 MHz). .....                   | 53 |
| <b>Figure S51.</b> $^1\text{H}$ - $^1\text{H}$ COSY spectrum of <b>50</b> (measured in $\text{CDCl}_3$ , 500 MHz). .....      | 54 |
| <b>Figure S52.</b> HSQC spectrum of <b>50</b> (measured in $\text{CDCl}_3$ , 500 MHz).....                                    | 55 |

|                                                                                                                               |    |
|-------------------------------------------------------------------------------------------------------------------------------|----|
| <b>Figure S53.</b> HMBC spectrum of <b>50</b> (measured in CDCl <sub>3</sub> , 500 MHz). .....                                | 56 |
| <b>Figure S54.</b> NOESY spectrum of <b>50</b> (measured in CDCl <sub>3</sub> , 500 MHz).....                                 | 57 |
| <b>Figure S55.</b> <sup>1</sup> H NMR spectrum of <b>51</b> (measured in CDCl <sub>3</sub> , 500 MHz). .....                  | 58 |
| <b>Figure S56.</b> <sup>13</sup> C NMR spectrum of <b>51</b> (measured in CDCl <sub>3</sub> , 126 MHz). .....                 | 59 |
| <b>Figure S57.</b> <sup>1</sup> H- <sup>1</sup> H COSY spectrum of <b>51</b> (measured in CDCl <sub>3</sub> , 500 MHz). ..... | 60 |
| <b>Figure S58.</b> HSQC spectrum of <b>51</b> (measured in CDCl <sub>3</sub> , 500 MHz).....                                  | 61 |
| <b>Figure S59.</b> HMBC spectrum of <b>51</b> (measured in CDCl <sub>3</sub> , 500 MHz). .....                                | 62 |
| <b>Figure S60.</b> NOESY spectrum of <b>51</b> (measured in CDCl <sub>3</sub> , 500 MHz).....                                 | 63 |
| <b>Figure S61.</b> <sup>1</sup> H NMR spectrum of <b>53</b> (measured in CDCl <sub>3</sub> , 500 MHz). .....                  | 64 |
| <b>Figure S62.</b> <sup>13</sup> C NMR spectrum of <b>53</b> (measured in CDCl <sub>3</sub> , 126 MHz). .....                 | 65 |
| <b>Figure S63.</b> <sup>1</sup> H- <sup>1</sup> H COSY spectrum of <b>53</b> (measured in CDCl <sub>3</sub> , 500 MHz). ..... | 66 |
| <b>Figure S64.</b> HSQC spectrum of <b>53</b> (measured in CDCl <sub>3</sub> , 500 MHz).....                                  | 67 |
| <b>Figure S65.</b> HMBC spectrum of <b>53</b> (measured in CDCl <sub>3</sub> , 500 MHz). .....                                | 68 |
| <b>Figure S66.</b> NOESY spectrum of <b>53</b> (measured in CDCl <sub>3</sub> , 500 MHz).....                                 | 69 |
| <b>Figure S67.</b> <sup>1</sup> H NMR spectrum of <b>54</b> (measured in CDCl <sub>3</sub> , 500 MHz). .....                  | 70 |
| <b>Figure S68.</b> <sup>13</sup> C NMR spectrum of <b>54</b> (measured in CDCl <sub>3</sub> , 126 MHz). .....                 | 71 |
| <b>Figure S69.</b> <sup>1</sup> H- <sup>1</sup> H COSY spectrum of <b>54</b> (measured in CDCl <sub>3</sub> , 500 MHz). ..... | 72 |
| <b>Figure S70.</b> HSQC spectrum of <b>54</b> (measured in CDCl <sub>3</sub> , 500 MHz).....                                  | 73 |

|                                                                                                                               |    |
|-------------------------------------------------------------------------------------------------------------------------------|----|
| <b>Figure S71.</b> HMBC spectrum of <b>54</b> (measured in CDCl <sub>3</sub> , 500 MHz). .....                                | 74 |
| <b>Figure S72.</b> NOESY spectrum of <b>54</b> (measured in CDCl <sub>3</sub> , 500 MHz).....                                 | 75 |
| <b>Figure S73.</b> <sup>1</sup> H NMR spectrum of <b>62</b> (measured in CDCl <sub>3</sub> , 500 MHz). .....                  | 76 |
| <b>Figure S74.</b> <sup>13</sup> C NMR spectrum of <b>62</b> (measured in CDCl <sub>3</sub> , 126 MHz). .....                 | 77 |
| <b>Figure S75.</b> <sup>1</sup> H- <sup>1</sup> H COSY spectrum of <b>62</b> (measured in CDCl <sub>3</sub> , 500 MHz). ..... | 78 |
| <b>Figure S76.</b> HSQC spectrum of <b>62</b> (measured in CDCl <sub>3</sub> , 500 MHz).....                                  | 79 |
| <b>Figure S77.</b> HMBC spectrum of <b>62</b> (measured in CDCl <sub>3</sub> , 500 MHz). .....                                | 80 |
| <b>Figure S78.</b> NOESY spectrum of <b>62</b> (measured in CDCl <sub>3</sub> , 500 MHz).....                                 | 81 |
| <b>Figure S79.</b> Experimental and calculated ECD spectra of <b>10</b> . .....                                               | 82 |

**Table S1.** LC-HR-MS data for the characteristic compounds.

| Compound  | $t_R$<br>(min) | Ions mode  | Formula              | Detected | Calculated | Error<br>(mDa) |
|-----------|----------------|------------|----------------------|----------|------------|----------------|
| <b>1</b>  | 8.56           | $[M+Na]^+$ | $C_{22}H_{28}O_8$    | 443.1686 | 443.1682   | 0.4            |
| <b>2</b>  | 9.14           | $[M+Na]^+$ | $C_{22}H_{28}O_9$    | 443.1685 | 443.1682   | 0.3            |
| <b>3</b>  | 9.65           | $[M+Na]^+$ | $C_{22}H_{28}O_7$    | 427.1732 | 427.1733   | -0.1           |
| <b>4</b>  | 10.02          | $[M+Na]^+$ | $C_{22}H_{28}O_7$    | 427.1735 | 427.1733   | 0.2            |
| <b>11</b> | 9.02           | $[M+Na]^+$ | $C_{22}H_{26}O_8$    | 441.1532 | 441.1525   | 0.7            |
| <b>16</b> | 6.11           | $[M+Na]^+$ | $C_{22}H_{28}O_{10}$ | 475.1572 | 475.1580   | -0.8           |
| <b>25</b> | 10.62          | $[M+Na]^+$ | $C_{22}H_{28}O_7$    | 427.1735 | 427.1733   | 0.2            |
| <b>26</b> | 9.51           | $[M+Na]^+$ | $C_{20}H_{26}O_6$    | 385.1627 | 385.1627   | 0.0            |
| <b>27</b> | 10.88          | $[M+Na]^+$ | $C_{20}H_{26}O_5$    | 369.1687 | 369.1678   | 0.9            |
| <b>28</b> | 10.73          | $[M+Na]^+$ | $C_{20}H_{26}O_5$    | 369.1682 | 369.1678   | 0.4            |
| <b>29</b> | 10.65          | $[M+Na]^+$ | $C_{20}H_{26}O_5$    | 369.1673 | 369.1678   | -0.5           |
| <b>30</b> | 12.67          | $[M+Na]^+$ | $C_{20}H_{26}O_4$    | 353.1736 | 353.1729   | 0.7            |
| <b>37</b> | 9.71           | $[M+Na]^+$ | $C_{24}H_{30}O_9$    | 485.1796 | 485.1788   | 0.8            |
| <b>38</b> | 7.93           | $[M+Na]^+$ | $C_{22}H_{28}O_8$    | 443.1685 | 443.1682   | 0.3            |
| <b>44</b> | 6.48           | $[M+Na]^+$ | $C_{20}H_{26}O_7$    | 401.1581 | 401.1576   | 0.5            |
| <b>55</b> | 8.70           | $[M+Na]^+$ | $C_{22}H_{26}O_8$    | 441.1524 | 441.1525   | -0.1           |
| <b>57</b> | 8.94           | $[M+Na]^+$ | $C_{16}H_{12}O_7$    | 339.0475 | 339.0481   | -0.6           |
| <b>59</b> | 6.77           | $[M+Na]^+$ | $C_{21}H_{20}O_{12}$ | 487.085  | 487.0852   | -0.2           |
| <b>57</b> | 8.94           | $[M-H]^-$  | $C_{16}H_{12}O_7$    | 315.0505 | 315.0505   | 0.0            |
| <b>59</b> | 6.77           | $[M-H]^-$  | $C_{21}H_{20}O_{12}$ | 463.0877 | 463.0877   | 0.0            |

**Figure S1.** LC-MS profiles of sample 7 (2015-70) in negative ion mode for detecting flavonoidal constituents, **57** and **59**. A: total ion chromatogram; B: base peak ion chromatogram; C: extracted ion chromatogram of  $m/z$  463.09; D: extracted ion chromatogram of  $m/z$  315.05.

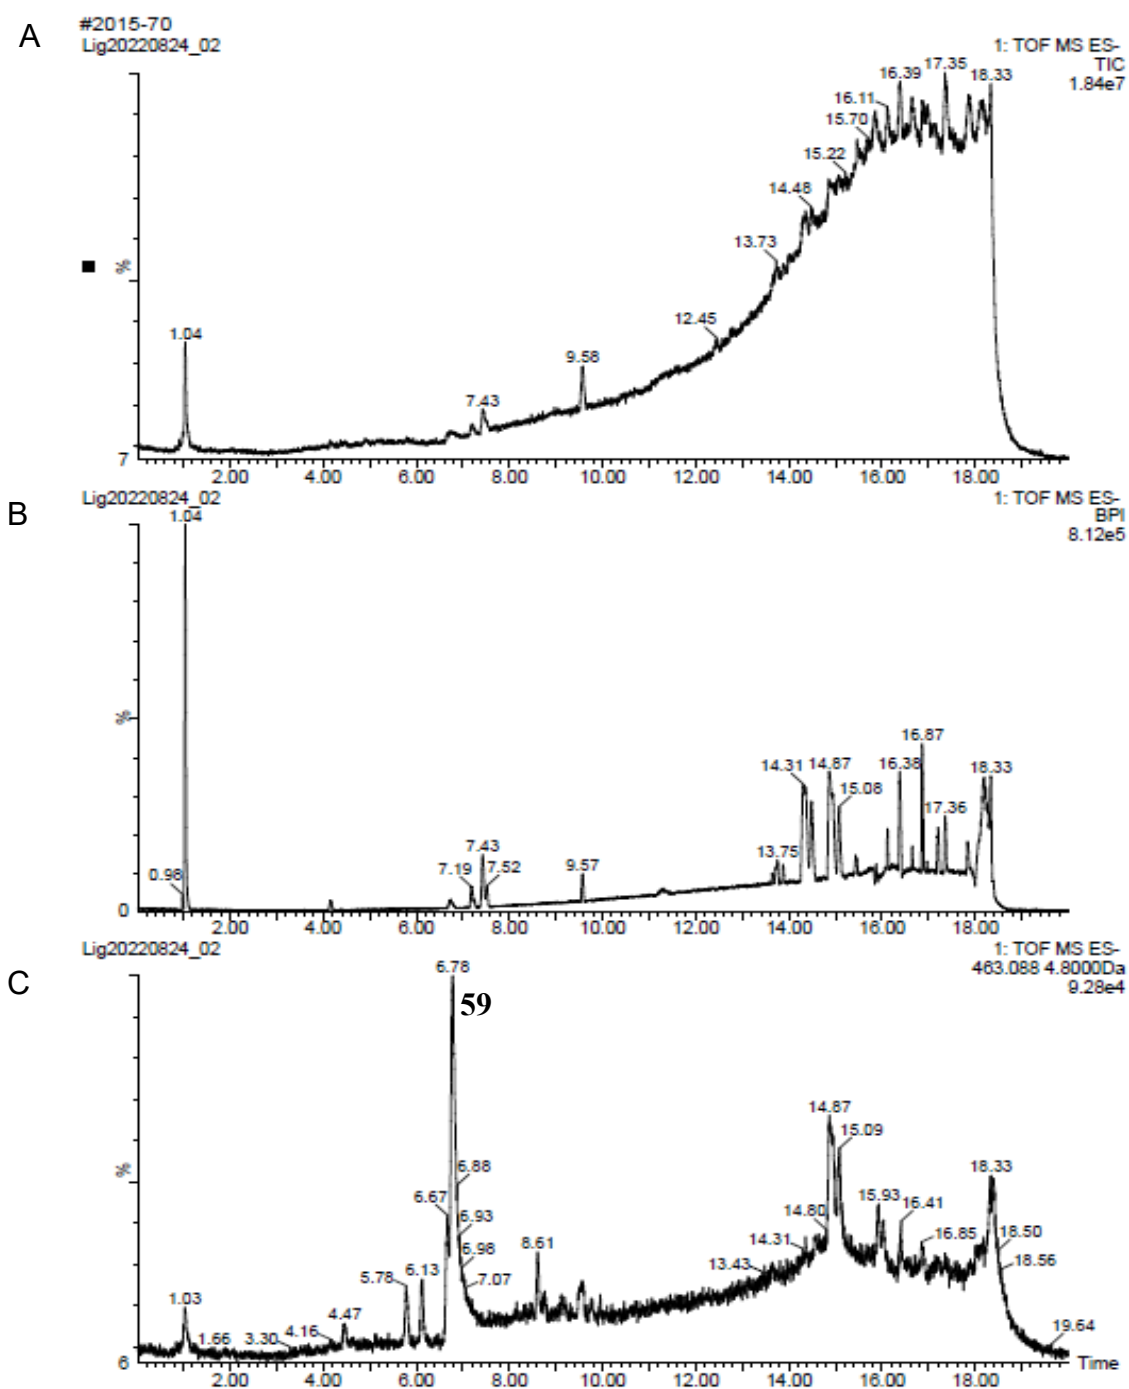

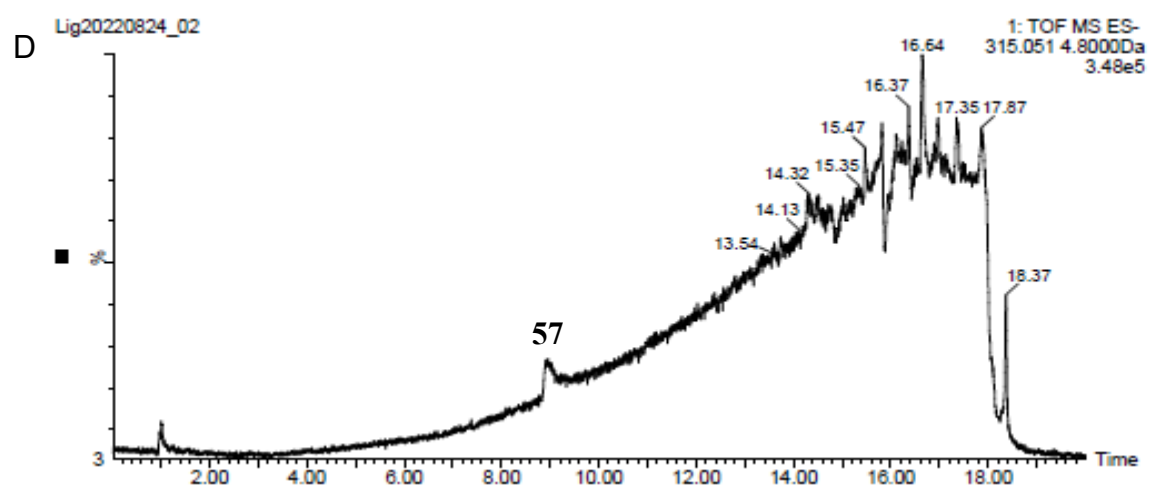



**Figure S2.** LC-MS profiles of sample 8 (2015-71) in negative ion mode for detecting flavonoidal constituents, **57** and **59**. A: total ion chromatogram; B: base peak ion chromatogram; C: extracted ion chromatogram of  $m/z$  315.05; D: extracted ion chromatogram of  $m/z$  463.09.

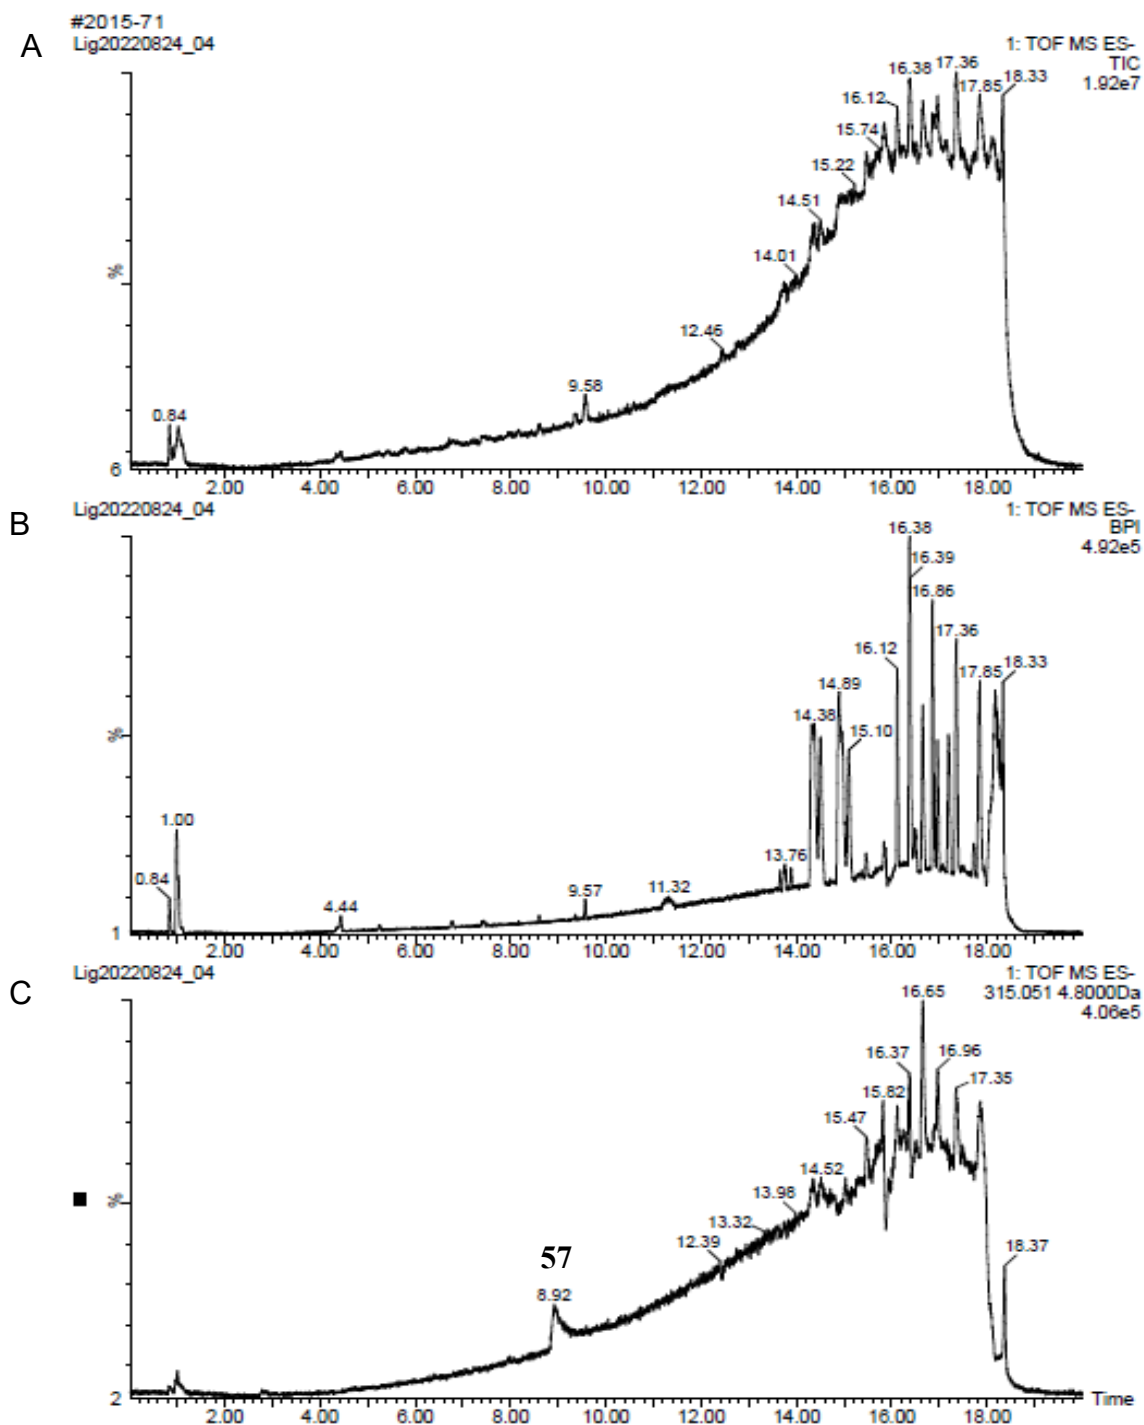

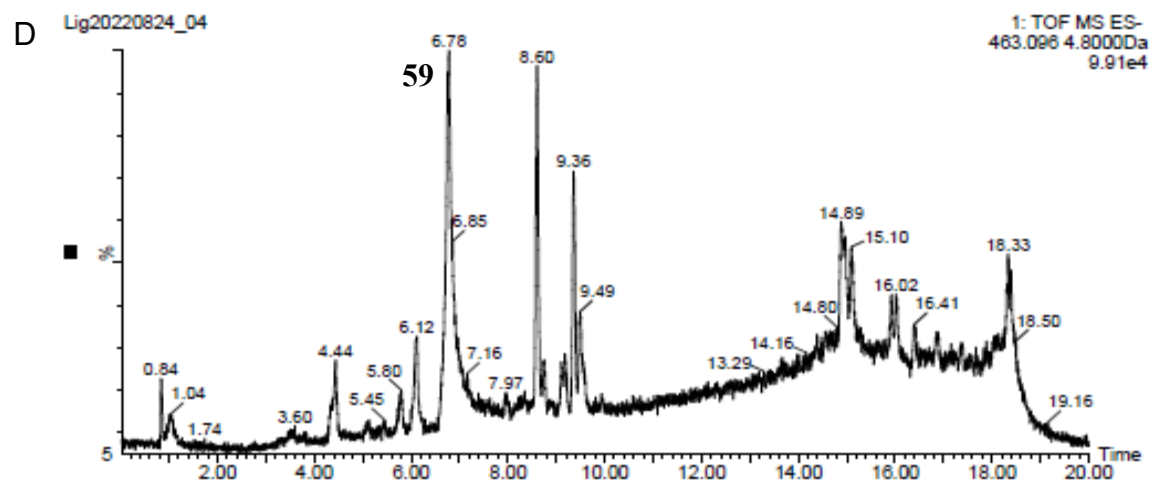

**Figure S3.**  $^1\text{H}$  NMR spectrum of **10** (measured in  $\text{CDCl}_3$ , 500 MHz).

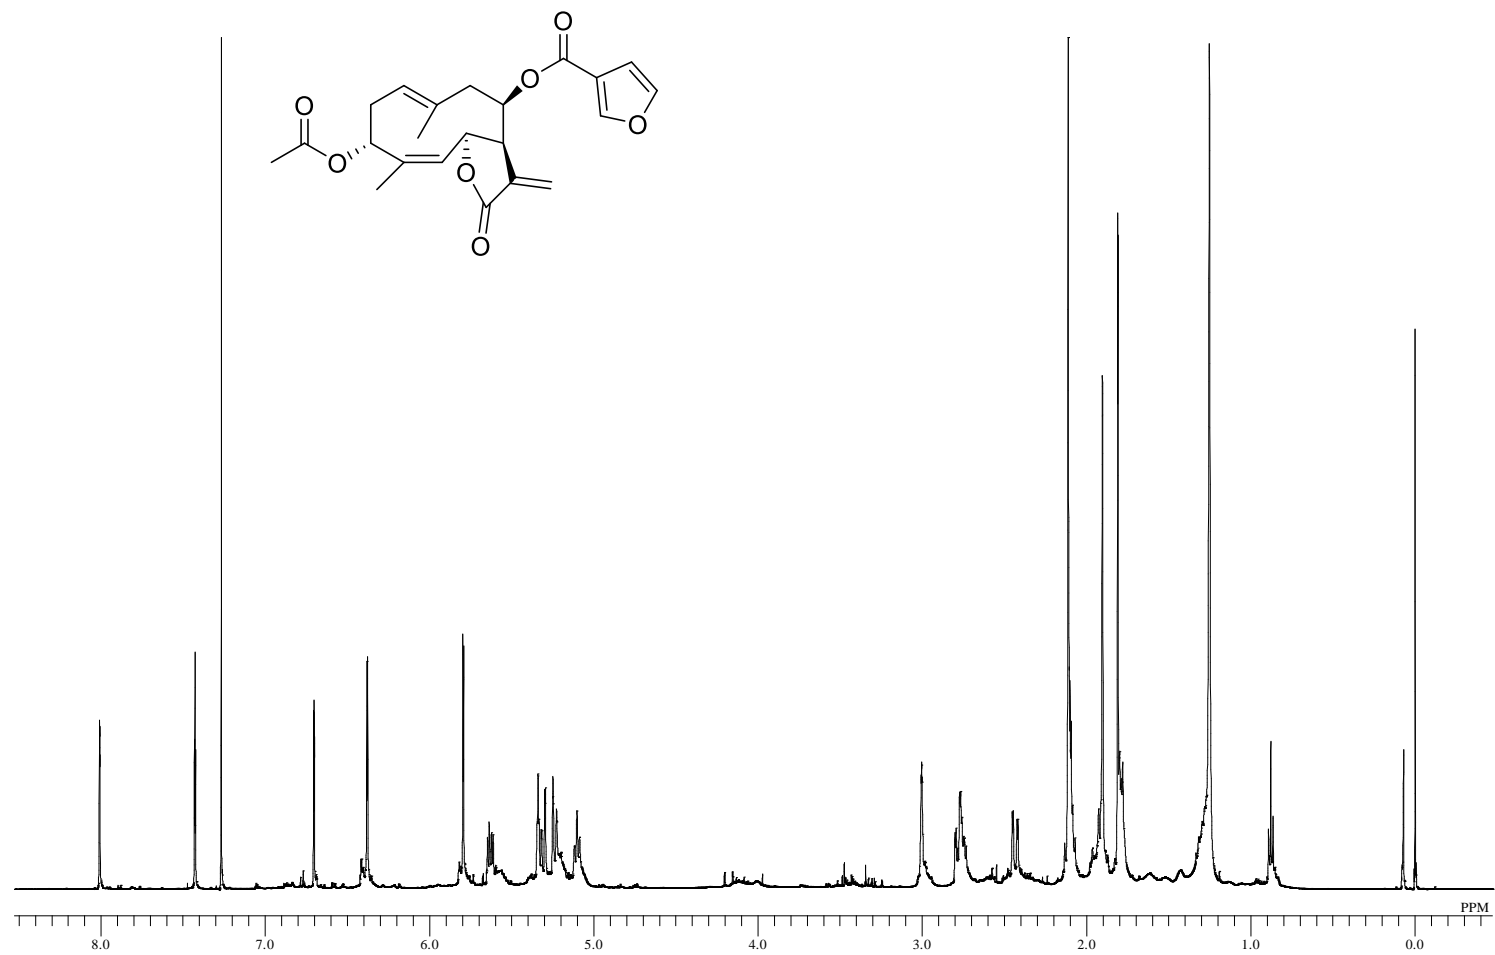

**Figure S4.**  $^{13}\text{C}$  NMR spectrum of **10** (measured in  $\text{CDCl}_3$ , 126 MHz).

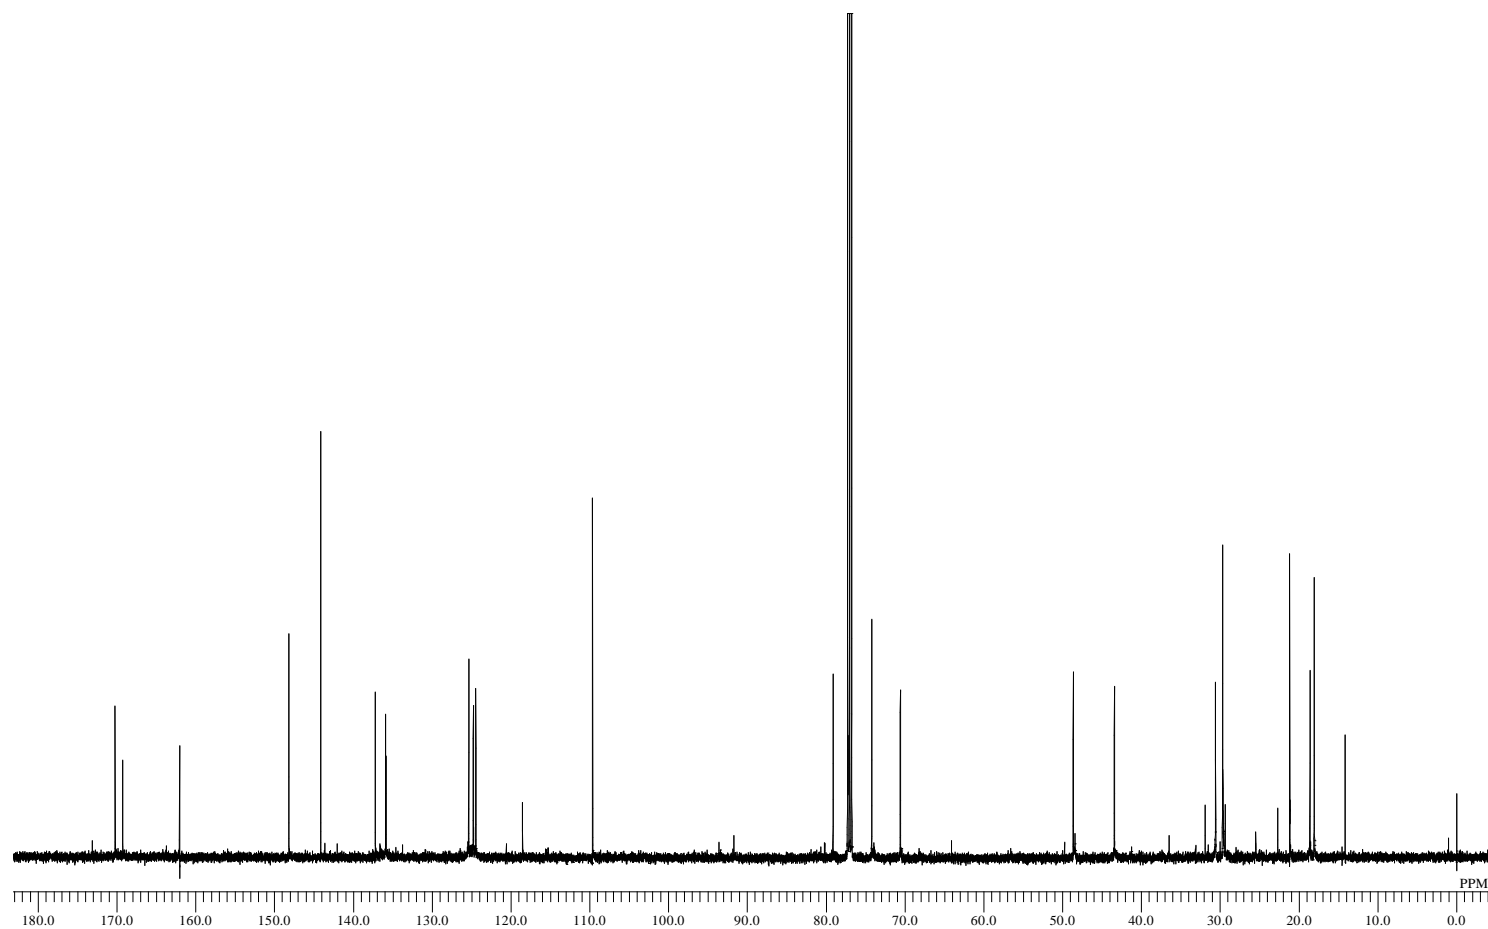

**Figure S5.**  $^1\text{H}$ - $^1\text{H}$  COSY spectrum of **10** (measured in  $\text{CDCl}_3$ , 500 MHz).

HYM-2014-48-L-4-3-17.9mg-COSY-CDCl3

exp4 gCOSY

| SAMPLE         |            | FLAGS         |          |
|----------------|------------|---------------|----------|
| date           | Jan 4 2021 | hs            | nm       |
| solvent        | cdcl3      | espul         | y        |
| sample         | haglvi     |               | 6180     |
| ACQUISITION    |            | SUBCIAL       |          |
| sw             | 4960.3     | temp          | not used |
| at             | 0.150      | gain          | 36       |
| sp             | 1488       | spin          | 0        |
| fn             | 4000       | F2 PROCESSING |          |
| ss             | 32         | sb            | -0.075   |
| dl             | 1.000      | sbs           | not used |
| nt             | 4          | fn            | 2048     |
| 2D ACQUISITION |            | F1 PROCESSING |          |
| sw1            | 4960.3     | sb1           | -0.026   |
| nl             | 128        | sbs1          | not used |
| ds             | 0          | proc1         | lp       |
| PRESATURATION  |            | fn1           | 2048     |
| satmode        | n          | DISPLAY       | -36.7    |
| wet            | n          | sp            | 4195.0   |
| TRANSMITTER    |            | wp            | -99.7    |
| tn             | El         | sp1           | 4330.6   |
| sfreq          | 500.477    | wp1           | 477.5    |
| tof            | -504.2     | rf1           | 0        |
| tpwr           | 58         | rfp           | 477.5    |
| pw             | 8.000      | rf11          | 0        |
| GRADIENTS      |            | rfp1          | 0        |
| gslvr          | 5154       | PLOT          |          |
| gtR            | 0.001000   | wc            | 206.0    |
| NRratio        | 1.000      | sc            | 0        |
| gstab          | 0.000500   | wc2           | 206.0    |
| DECOUPLER      |            | sc2           | 0        |
| dn             | Cl3        | vs            | 154      |
| dm             | nmn        | th            | 5        |
|                | al         | cdc           | av       |

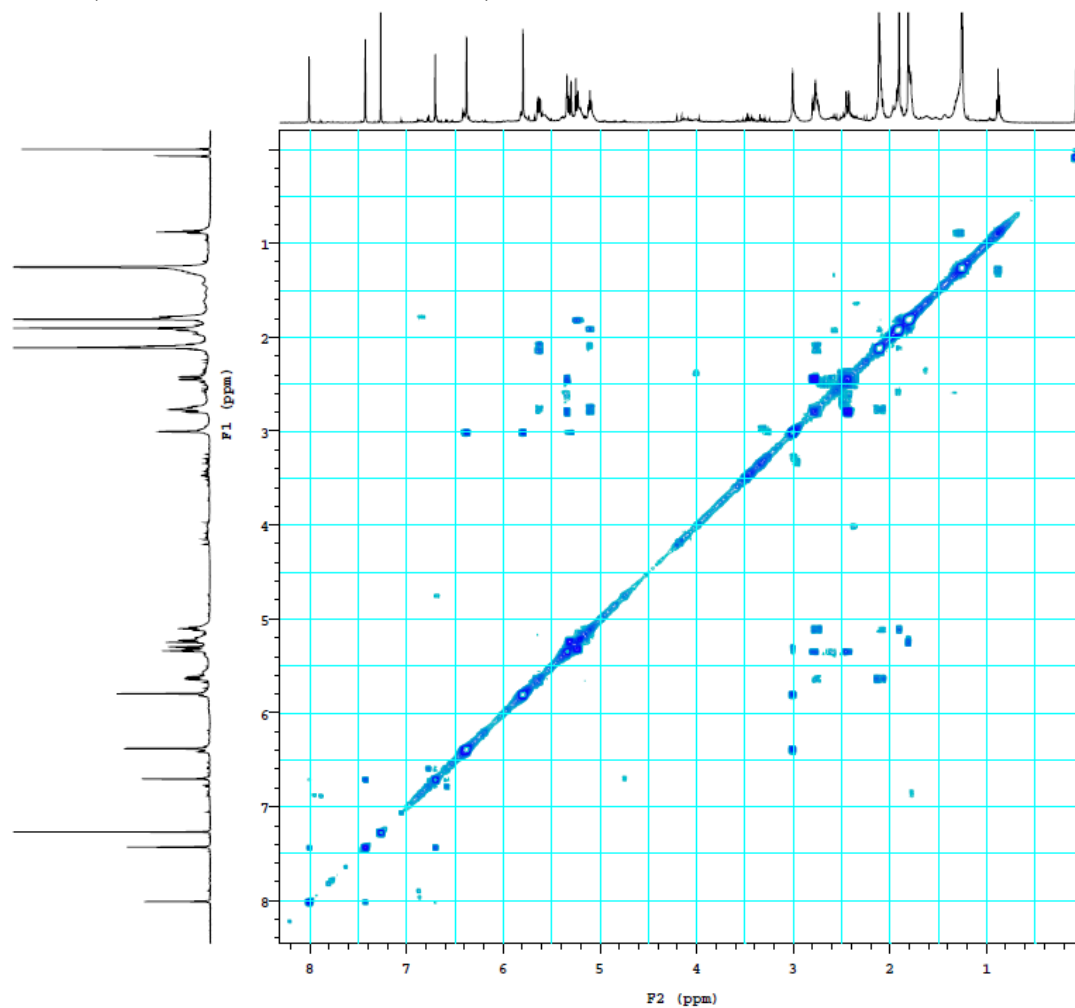

**Figure S6.** HSQC spectrum of **10** (measured in CDCl<sub>3</sub>, 500 MHz).

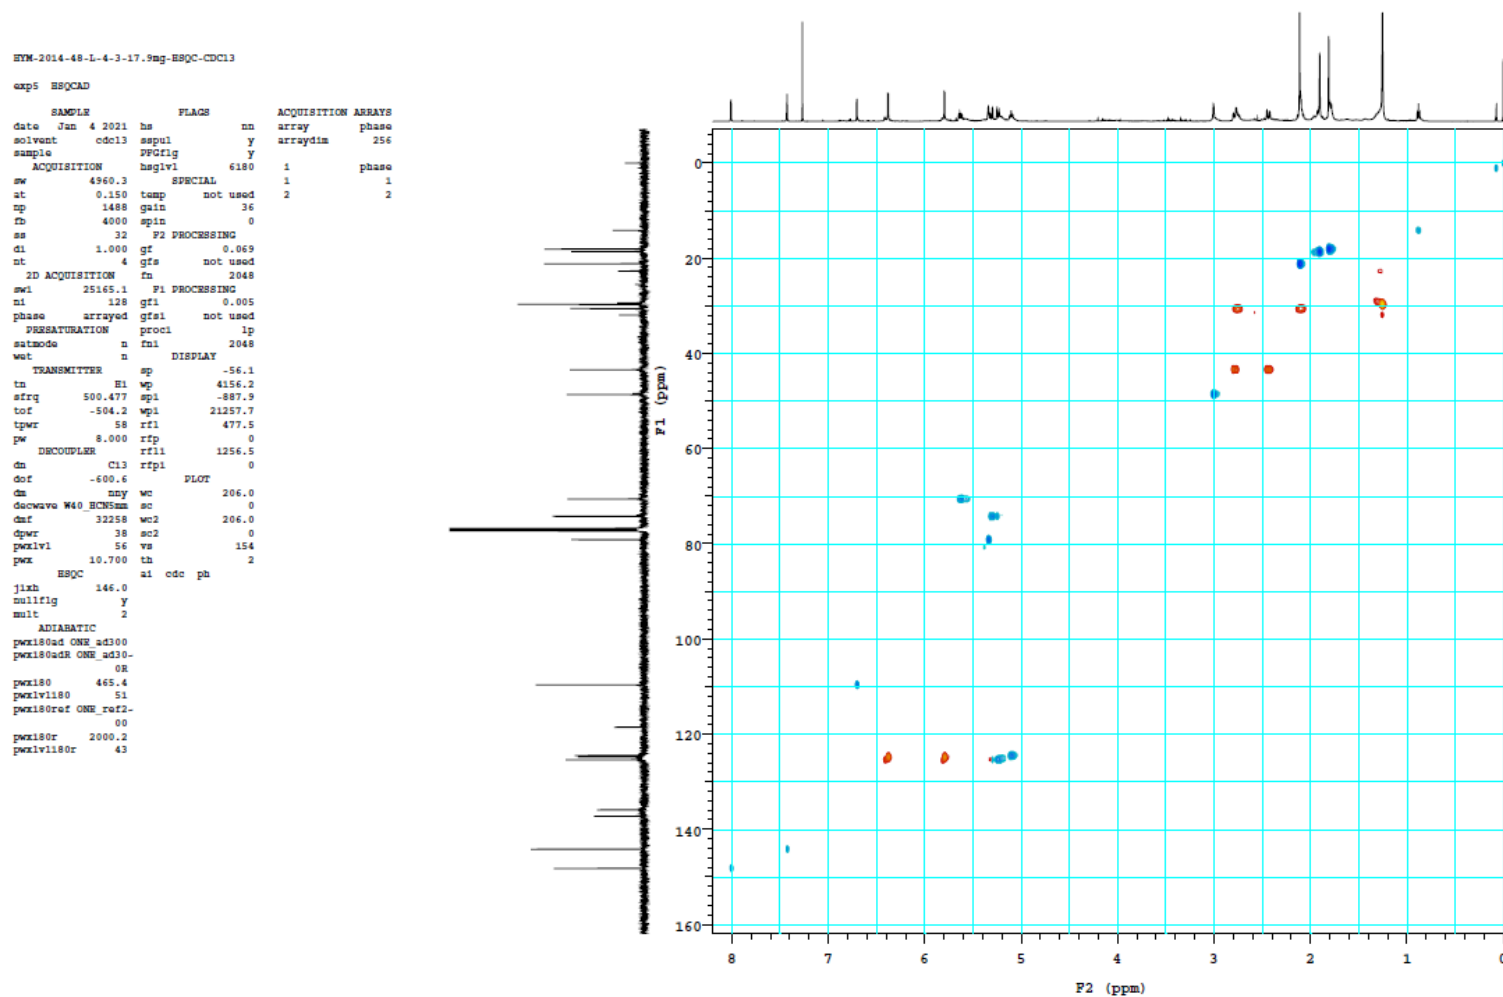

**Figure S7.** HMBC spectrum of **10** (measured in CDCl<sub>3</sub>, 500 MHz).

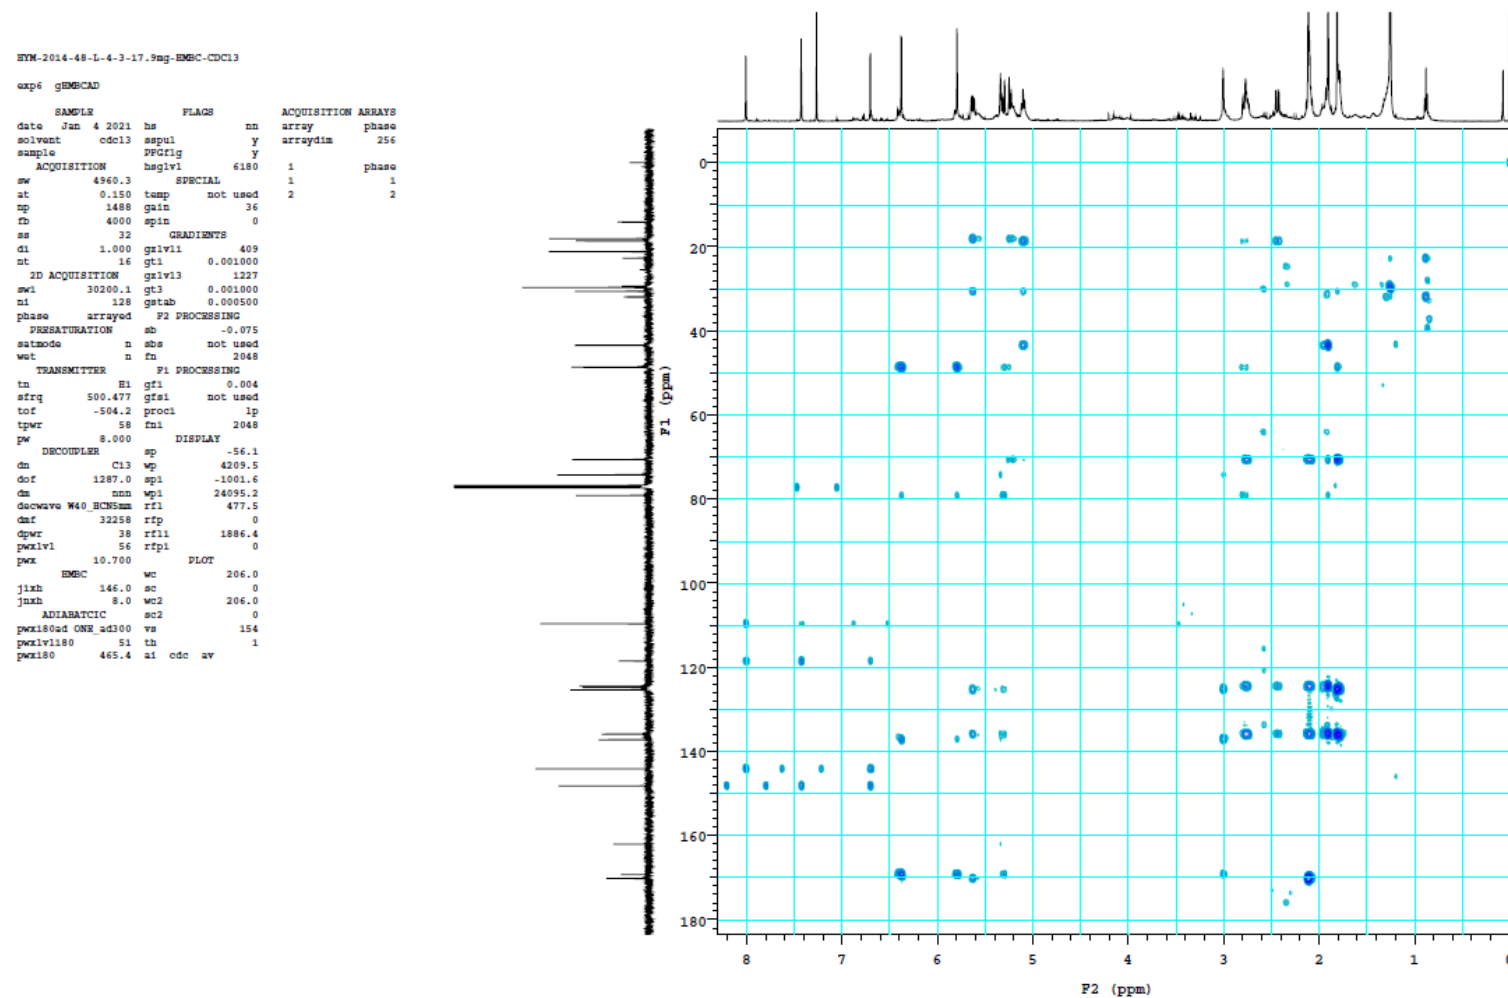

**Figure S8.** NOESY spectrum of **10** (measured in CDCl<sub>3</sub>, 500 MHz).

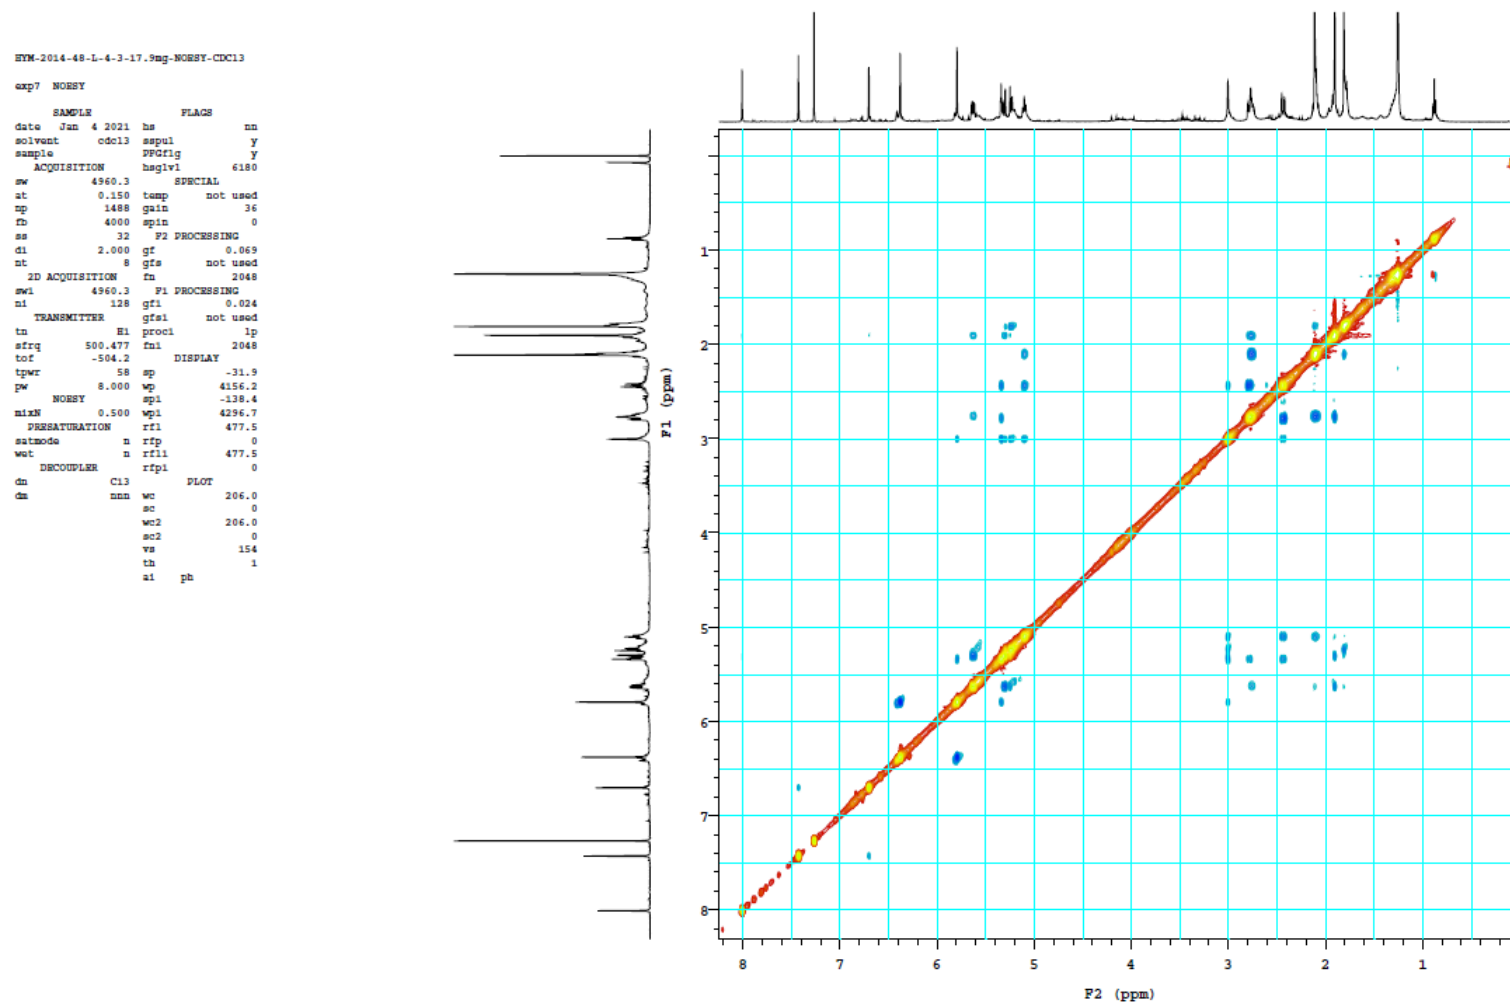



**Figure S9.**  $^1\text{H}$  NMR spectrum of **17** (measured in  $\text{CDCl}_3$ , 500 MHz).

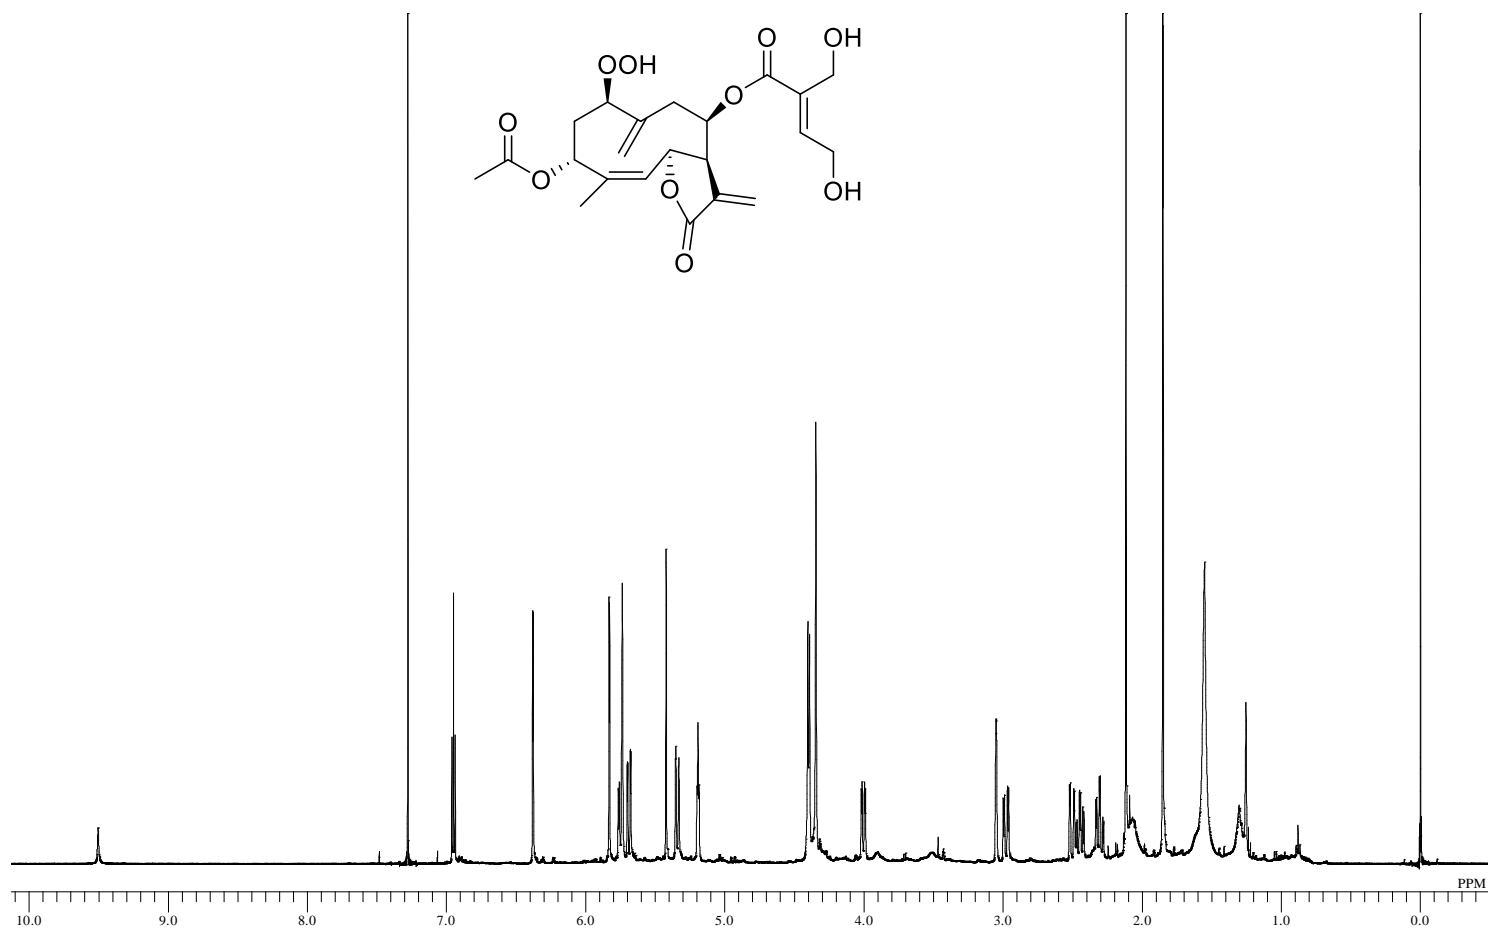

**Figure S10.**  $^{13}\text{C}$  NMR spectrum of **17** (measured in  $\text{CDCl}_3$ , 126 MHz).

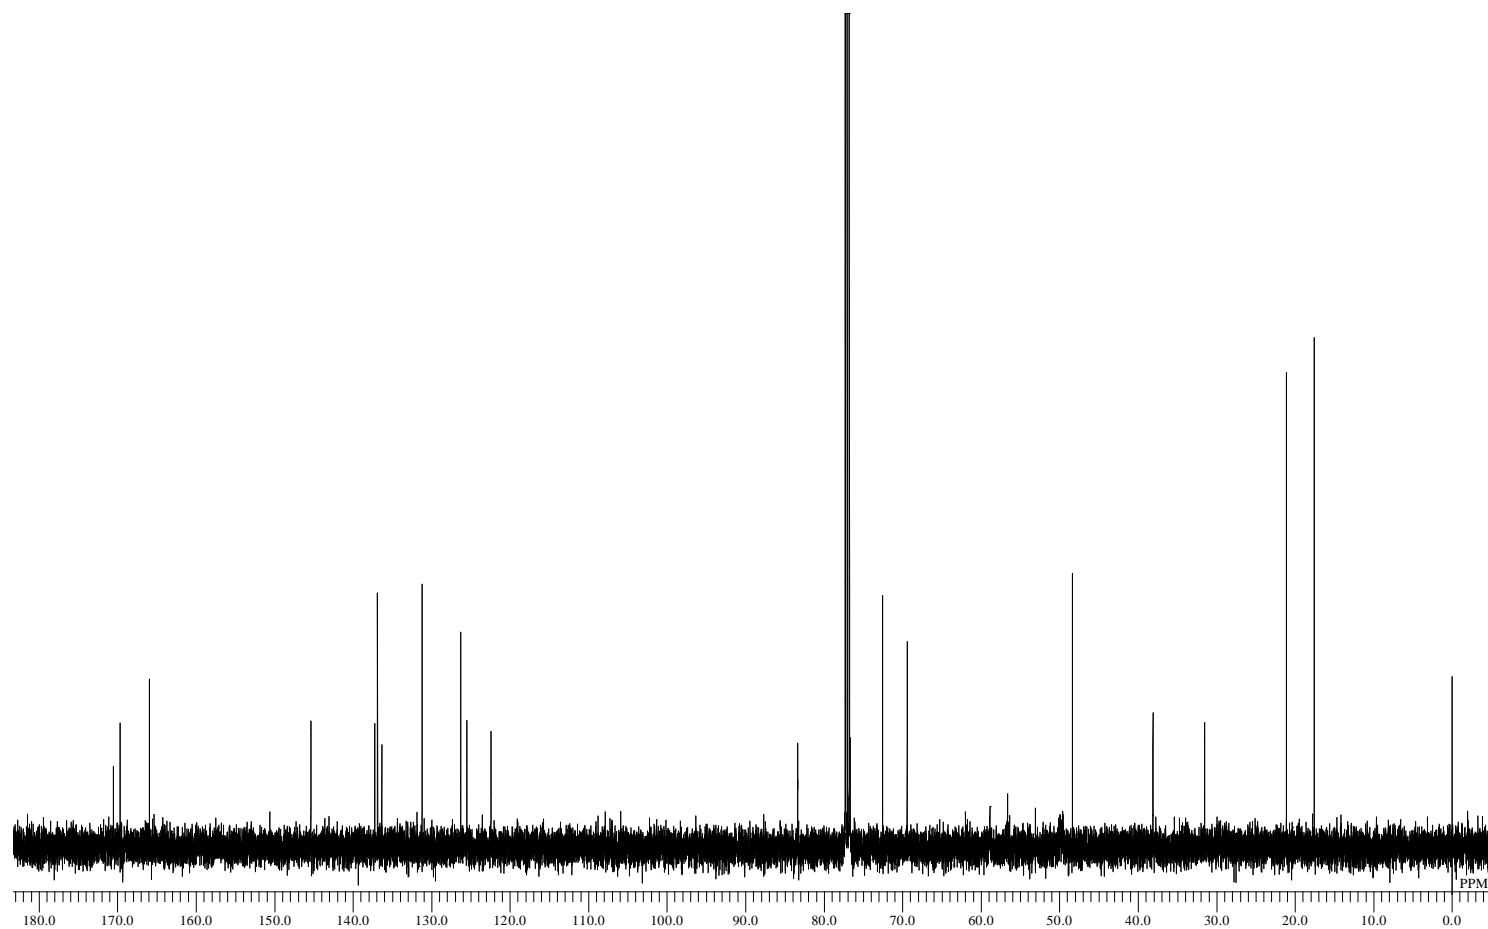

**Figure S11.**  $^1\text{H}$ - $^1\text{H}$  COSY spectrum of **17** (measured in  $\text{CDCl}_3$ , 500 MHz).

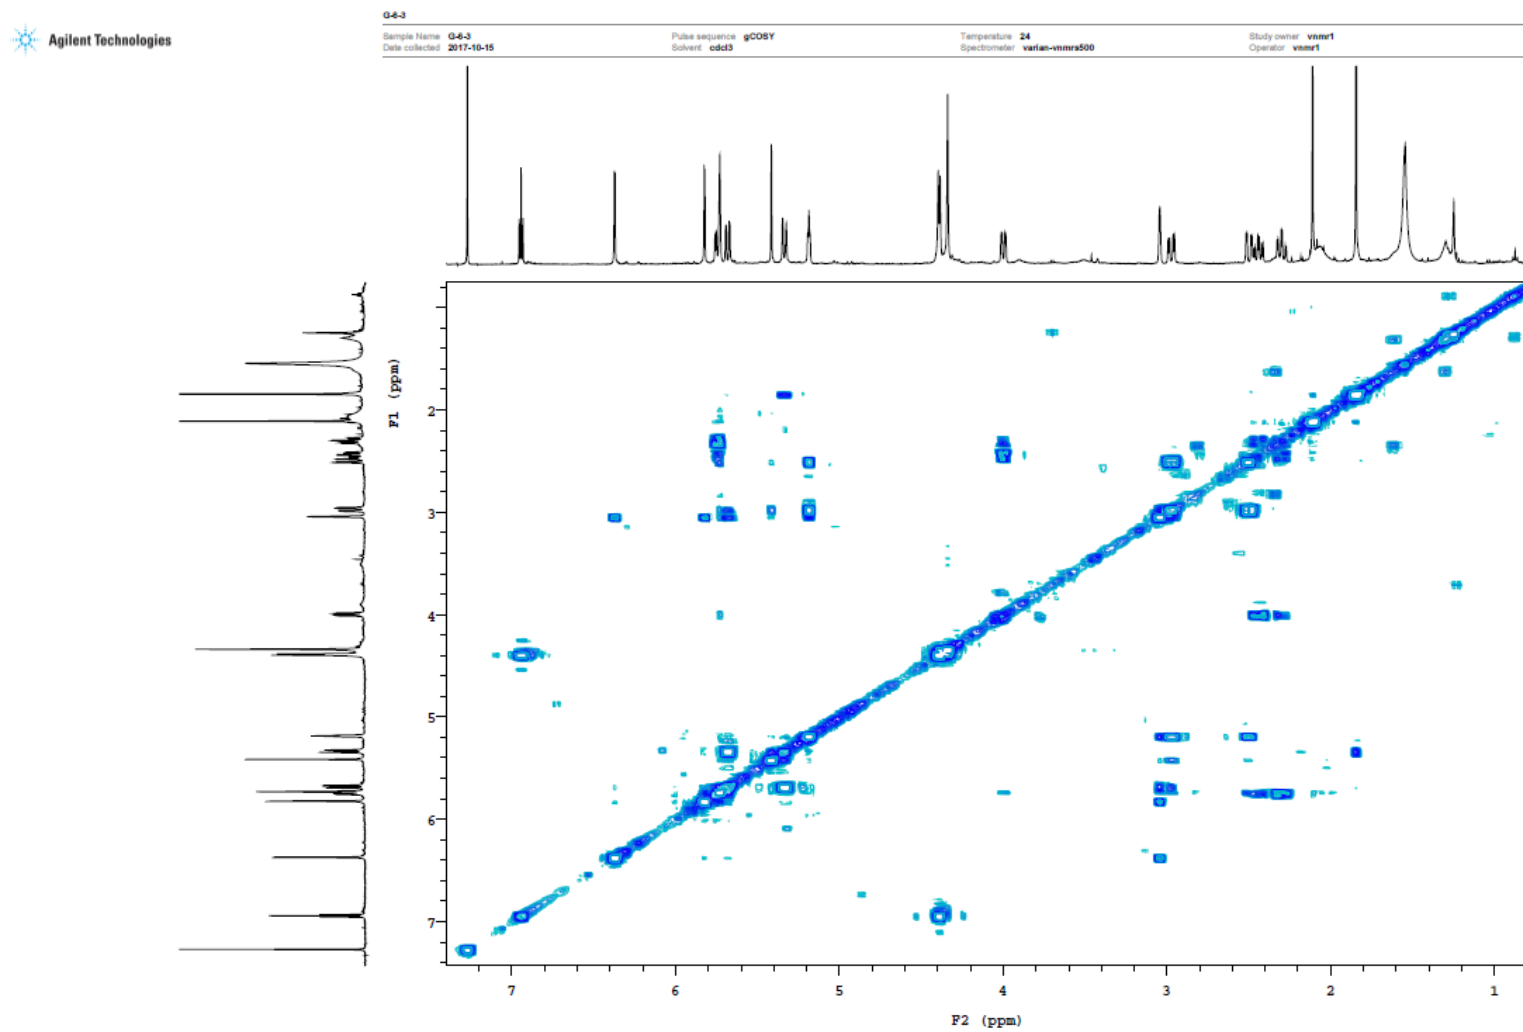

**Figure S12.** HSQC spectrum of **17** (measured in CDCl<sub>3</sub>, 500 MHz).

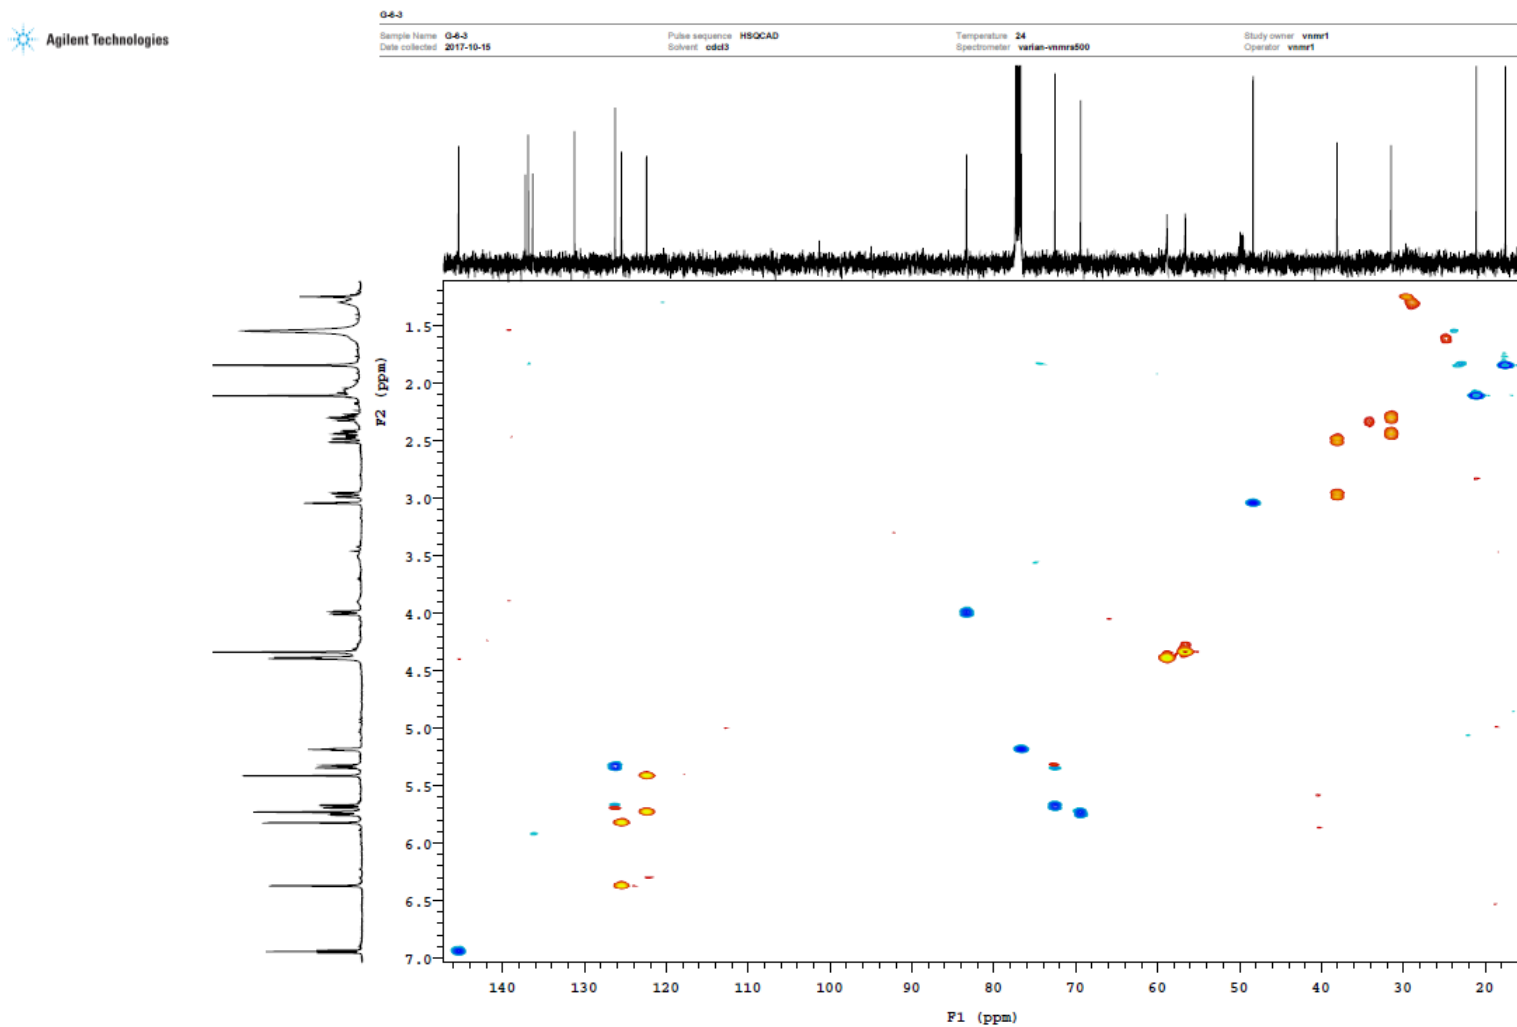

**Figure S13.** HMBC spectrum of **17** (measured in CDCl<sub>3</sub>, 500 MHz).

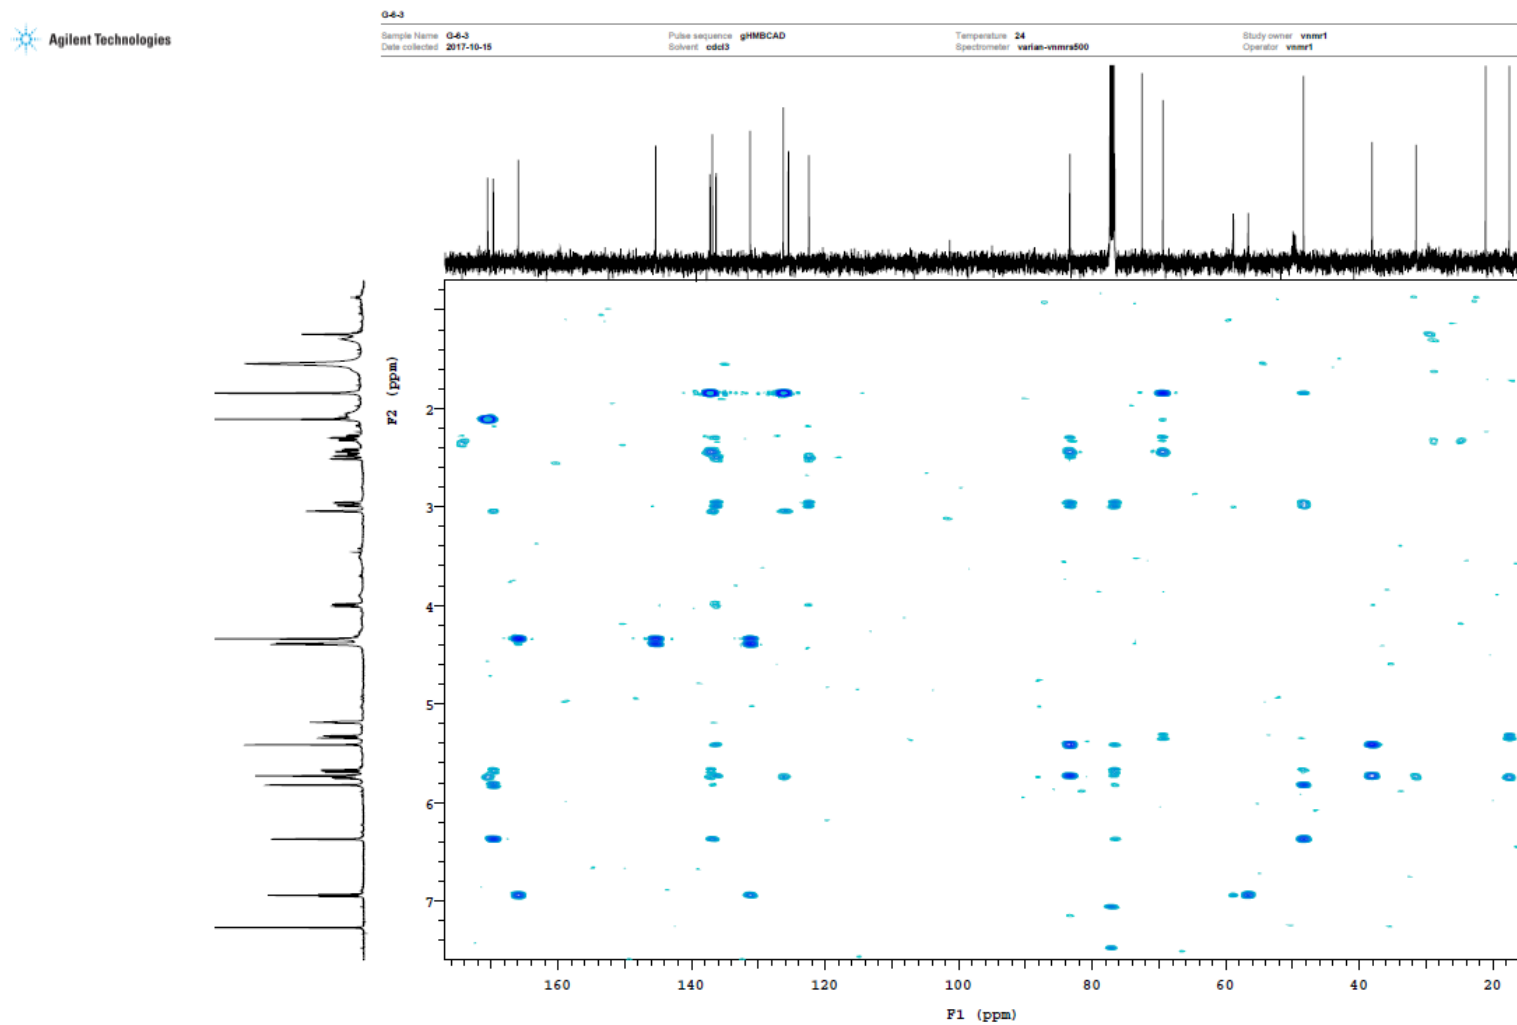

**Figure S14.** NOESY spectrum of **17** (measured in CDCl<sub>3</sub>, 500 MHz).

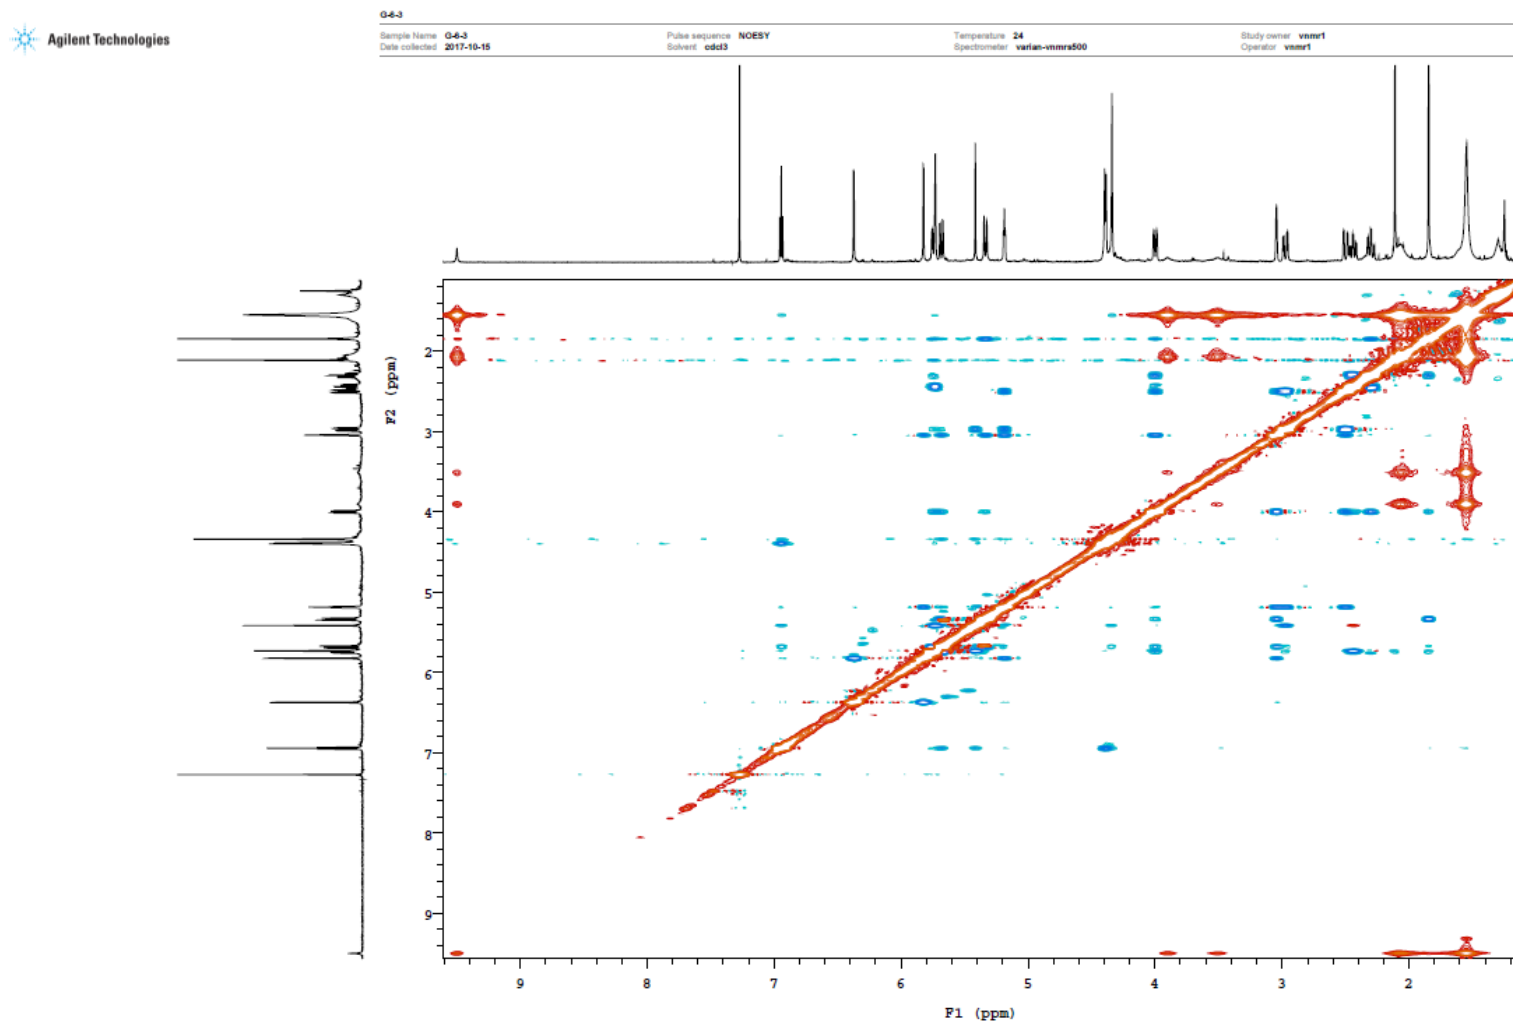

**Figure S15.**  $^1\text{H}$  NMR spectrum of **18** (measured in  $\text{CDCl}_3$ , 500 MHz).

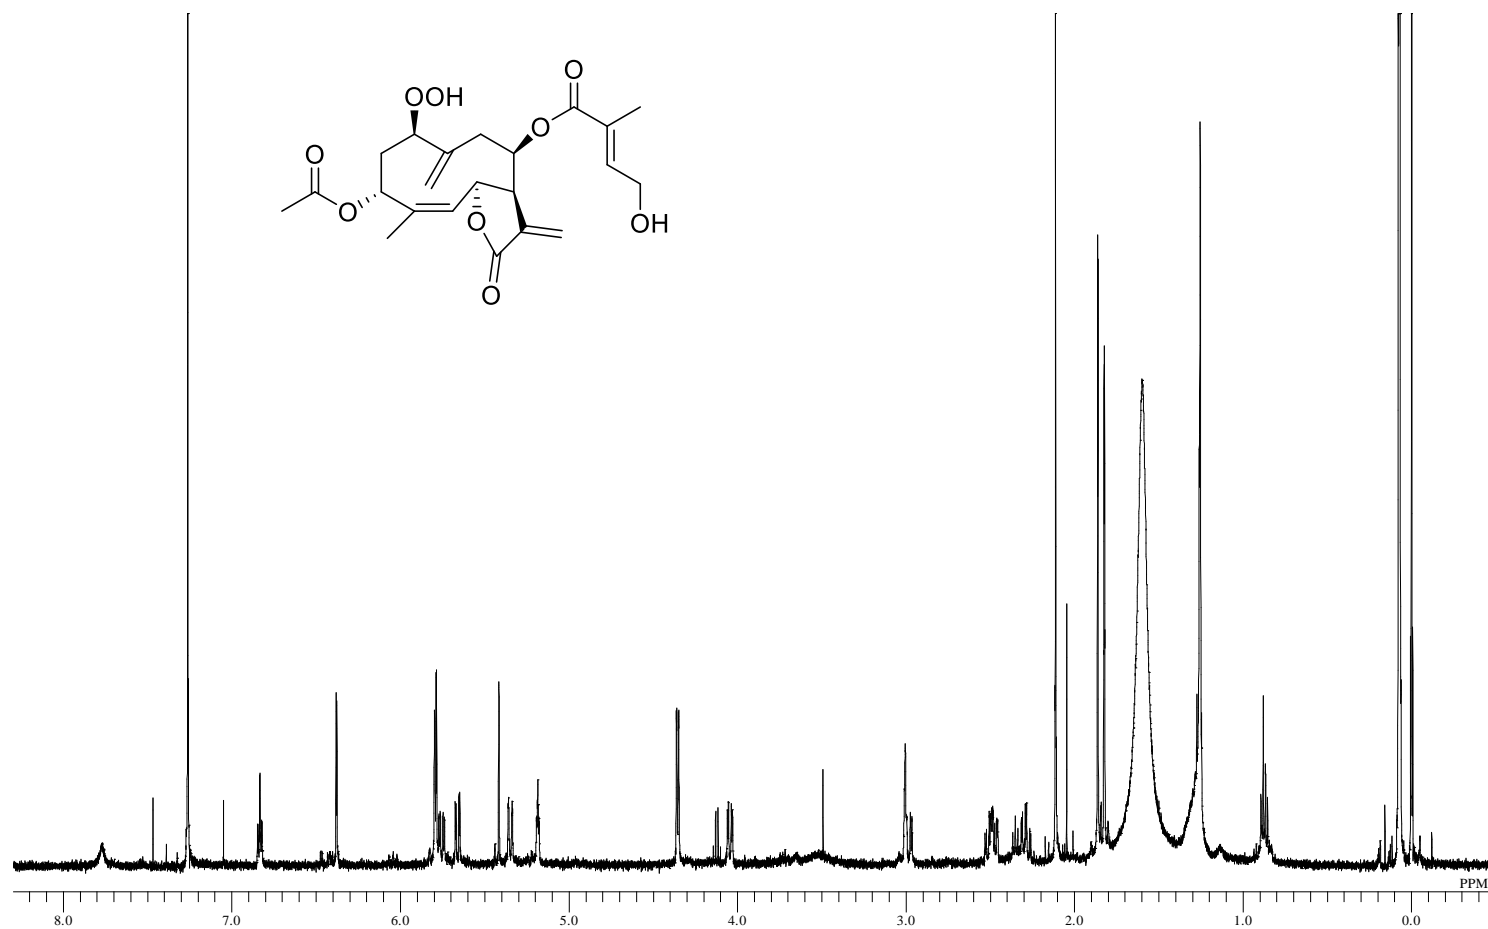

**Figure S16.**  $^{13}\text{C}$  NMR spectrum of **18** (measured in  $\text{CDCl}_3$ , 126 MHz).

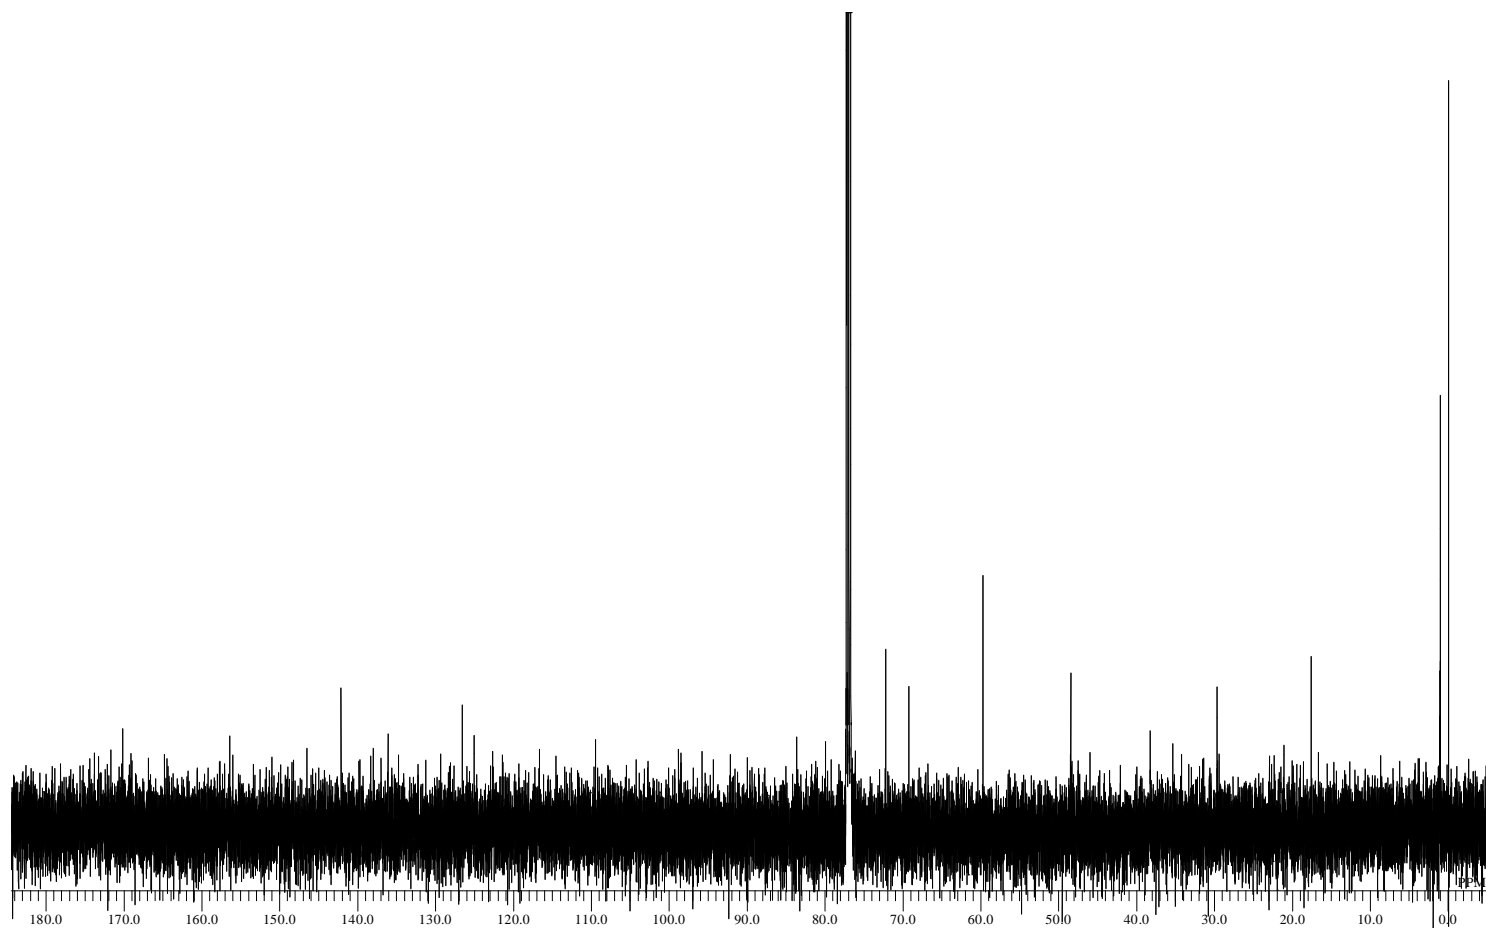



**Figure S17.**  $^1\text{H}$ - $^1\text{H}$  COSY spectrum of **18** (measured in  $\text{CDCl}_3$ , 500 MHz).

HYM-F-2-2-combined1.5mg-COSY\_cdc13

exp6 gCOSY

| SAMPLE         |             | FLAGS         |          |
|----------------|-------------|---------------|----------|
| date           | Jun 12 2017 | hs            | nn       |
| solvent        | cdc13       | sspl          | 7        |
| sample         | hsglv1      | hsglv1        | 6240     |
| ACQUISITION    |             | SPECIAL       |          |
| sw             | 4464.3      | temp          | 24.0     |
| at             | 0.150       | gain          | 50       |
| np             | 1340        | spin          | 0        |
| fb             | 4000        | F2 PROCESSING |          |
| ss             | 32          | ab            | -0.075   |
| dl             | 1.000       | abs           | not used |
| nt             | 4           | fn            | 2048     |
| 2D ACQUISITION |             | F1 PROCESSING |          |
| sw1            | 4464.3      | ab1           | -0.029   |
| ni             | 128         | ab1           | not used |
| d2             | 0           | proc1         | lp       |
| PRESATURATION  | fn1         | 2048          |          |
| satmode        | n           | DISPLAY       |          |
| wet            | n           | sp            | -93.8    |
| TRANSMITTER    | H1          | vp            | 4119.9   |
| tn             | 500.483     | spl           | -124.3   |
| sfrq           | -524.7      | wpl           | 4207.1   |
| tof            | 58          | rfl           | 259.5    |
| tpwr           | 7.500       | rfl1          | 259.5    |
| pw             |             | rfl1          | 259.5    |
| GRADIENTS      | rfl1        | 0             |          |
| gslv1E         | 5208        | PLOT          |          |
| gte            | 0.001000    | wc            | 206.0    |
| EDratio        | 1.000       | sc            | 0        |
| getab          | 0.000500    | wc2           | 206.0    |
| DECOUPLER      | sc2         | 0             |          |
| dn             | C13         | va            | 889      |
| dm             | nnn         | th            | 7        |
|                | ai          | cdc           | av       |

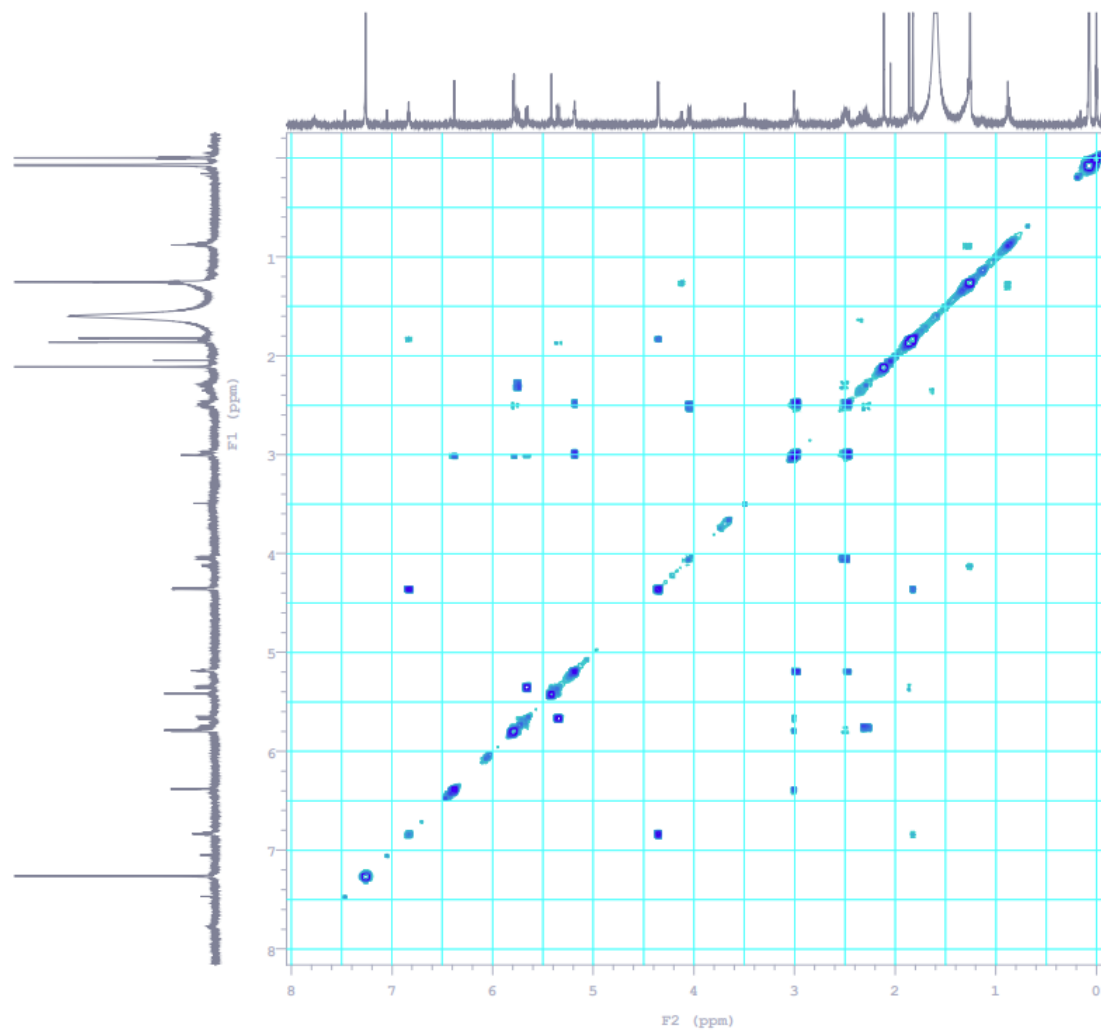

**Figure S18.** HSQC spectrum of **18** (measured in CDCl<sub>3</sub>, 500 MHz).

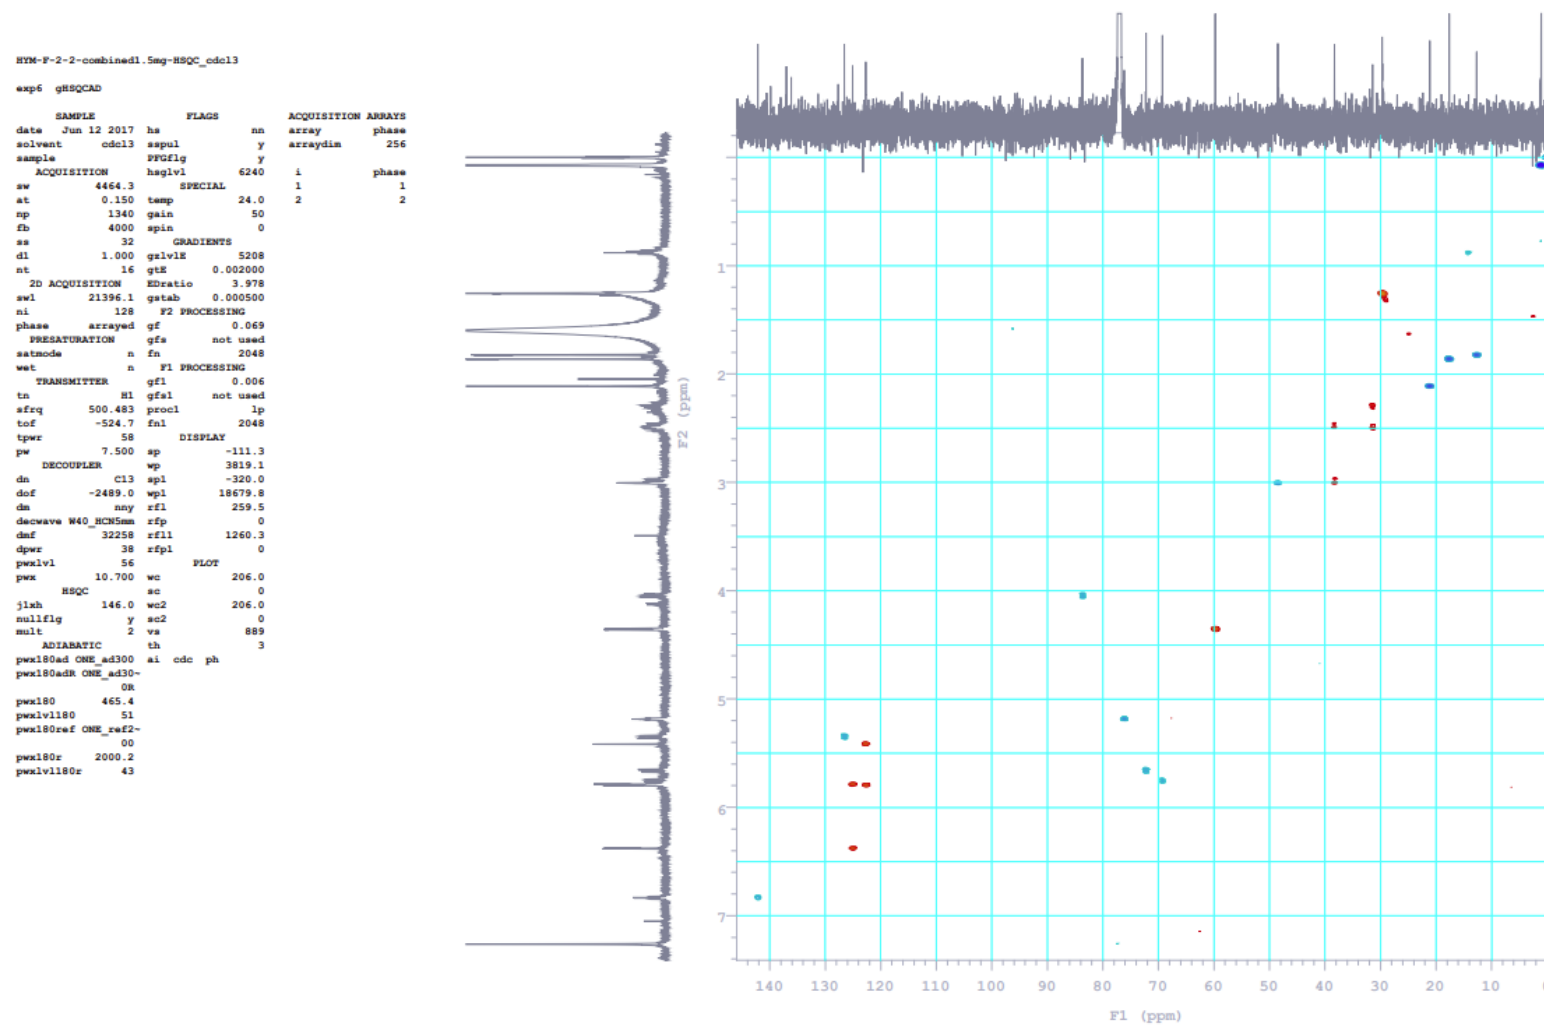

**Figure S19.** HMBC spectrum of **18** (measured in CDCl<sub>3</sub>, 500 MHz).

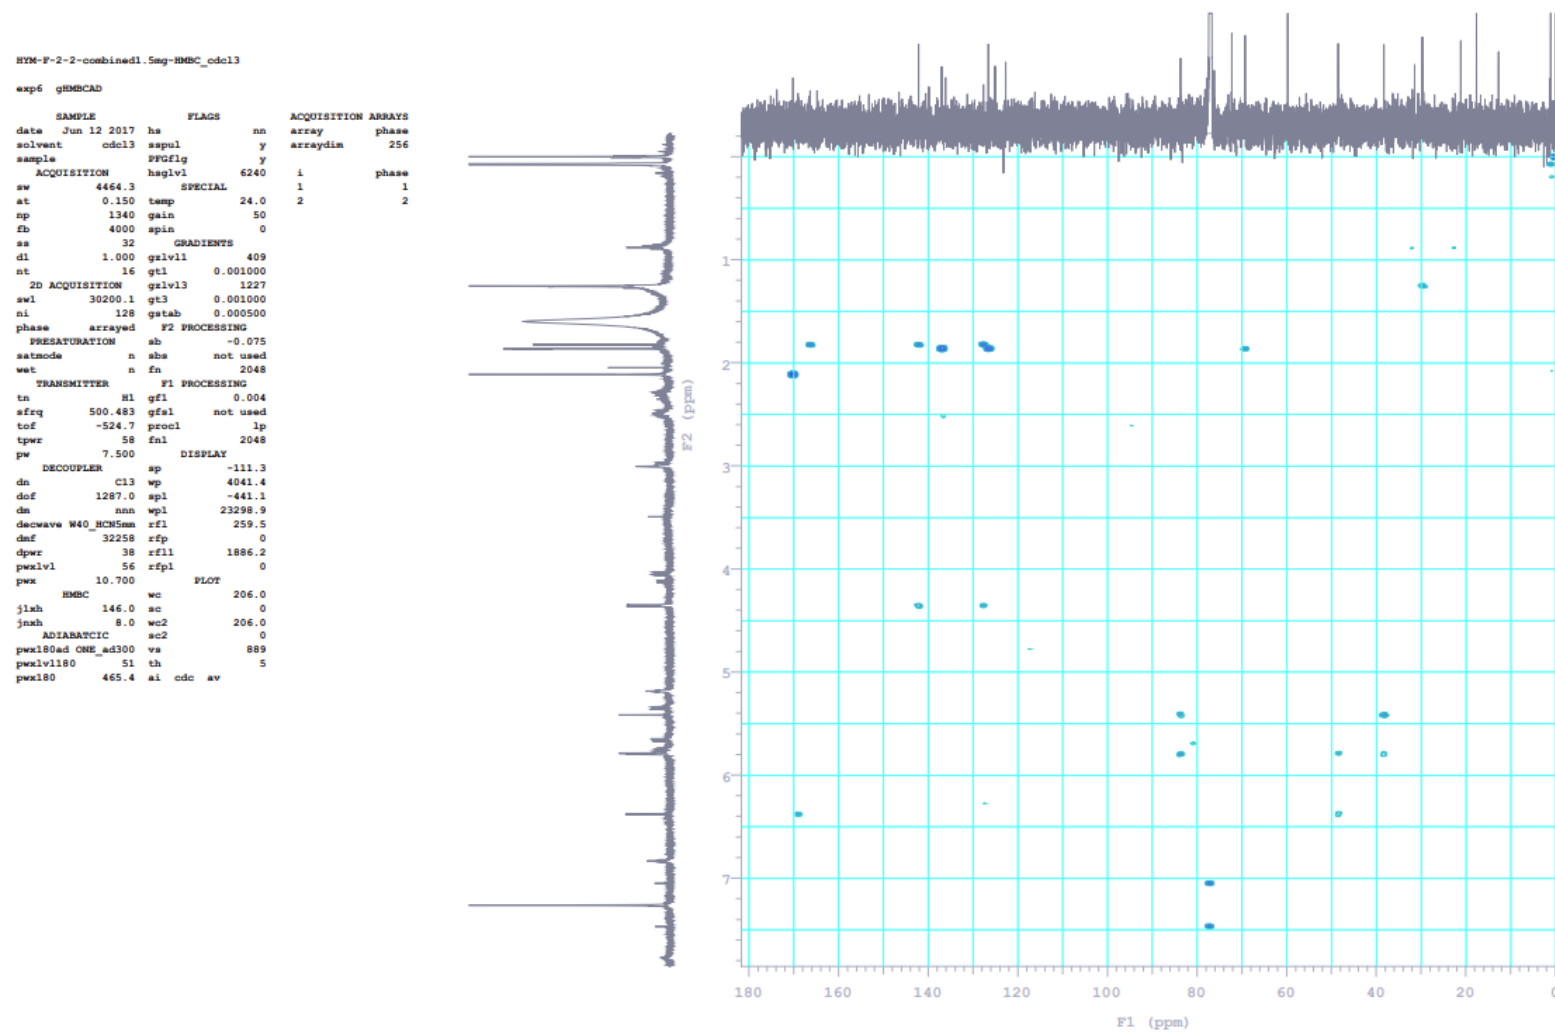

**Figure S20.** NOESY spectrum of **18** (measured in CDCl<sub>3</sub>, 500 MHz).

HYM-F-2-2-combined1.5mg-NOESY\_cdcl3

exp6 NOESY

| SAMPLE         |             | FLAGS         |          |
|----------------|-------------|---------------|----------|
| date           | Jun 12 2017 | hs            | nn       |
| solvent        | cdcl3       | sspl          | y        |
| sample         | PF021g      | y             |          |
| ACQUISITION    | haglv1      | 6240          |          |
| sw             | 4464.3      | SPECIAL       |          |
| at             | 0.150       | temp          | 24.0     |
| np             | 1340        | gain          | 50       |
| fb             | 4000        | spin          | 0        |
| ss             | 32          | F2 PROCESSING |          |
| d1             | 2.000       | gf            | 0.069    |
| nt             | 4           | gfs           | not used |
| 2D ACQUISITION | fn          | 2048          |          |
| sw1            | 4464.3      | F1 PROCESSING |          |
| ni             | 128         | gf1           | 0.026    |
| TRANSMITTER    | gf1         | not used      |          |
| tn             | H1          | procl         | lp       |
| sfrq           | 500.483     | fn1           | 2048     |
| tof            | -524.7      | DISPLAY       |          |
| tpwr           | 58          | sp            | -124.3   |
| pw             | 7.500       | wp            | 4220.1   |
| mixN           | NOESY       | wp1           | -63.3    |
| PRESATURATION  | rf1         | 259.5         |          |
| satmode        | n           | rpf           | 0        |
| wet            | n           | rf11          | 259.5    |
| DECOUPLER      | rpf1        | 0             |          |
| dn             | C13         | PLOT          |          |
| dm             | nnn         | wc            | 206.0    |
|                |             | sc            | 0        |
|                |             | wc2           | 206.0    |
|                |             | sc2           | 0        |
|                |             | va            | 889      |
|                |             | th            | 1        |
|                |             | ai            | ph       |

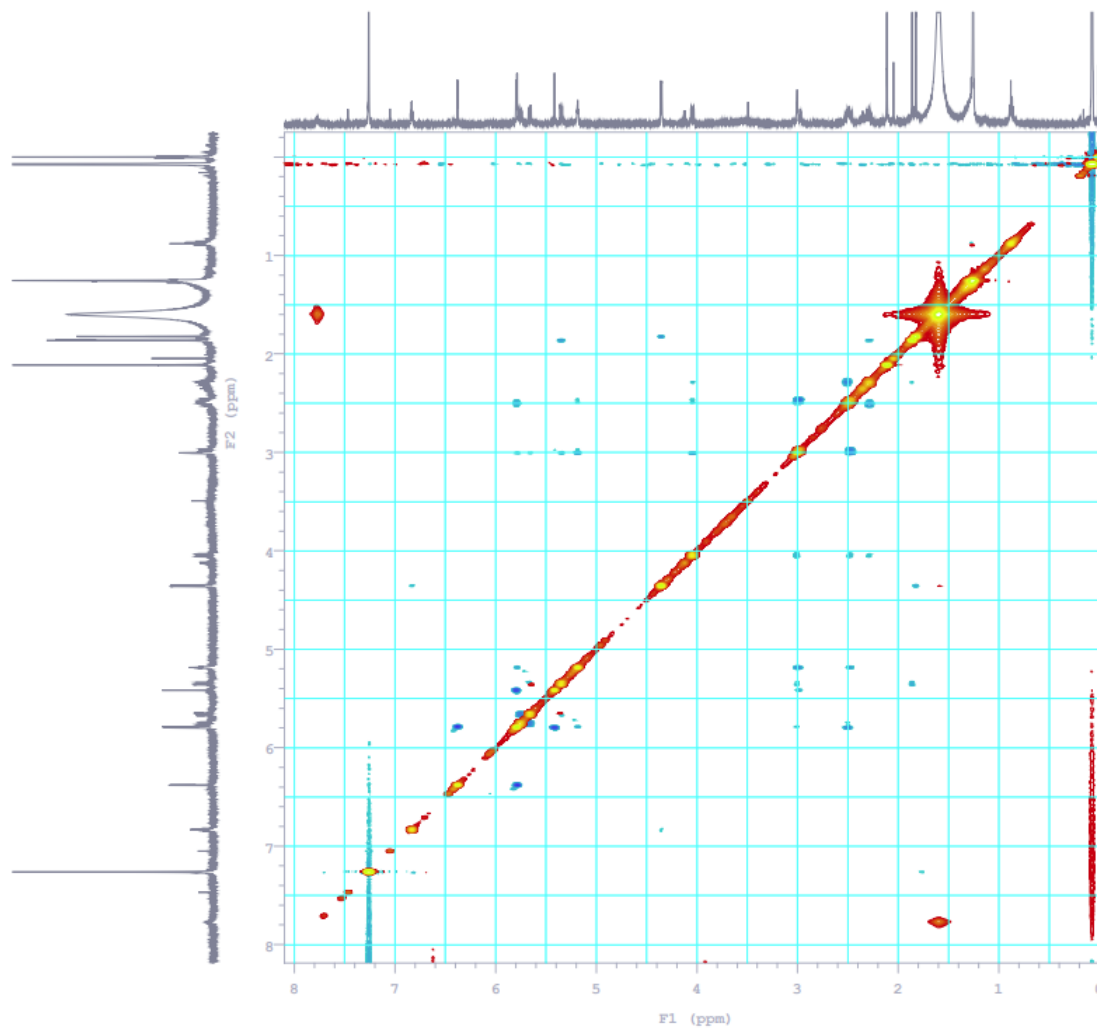

**Figure S21.**  $^1\text{H}$  NMR spectrum of **24** (measured in  $\text{CDCl}_3$ , 500 MHz).

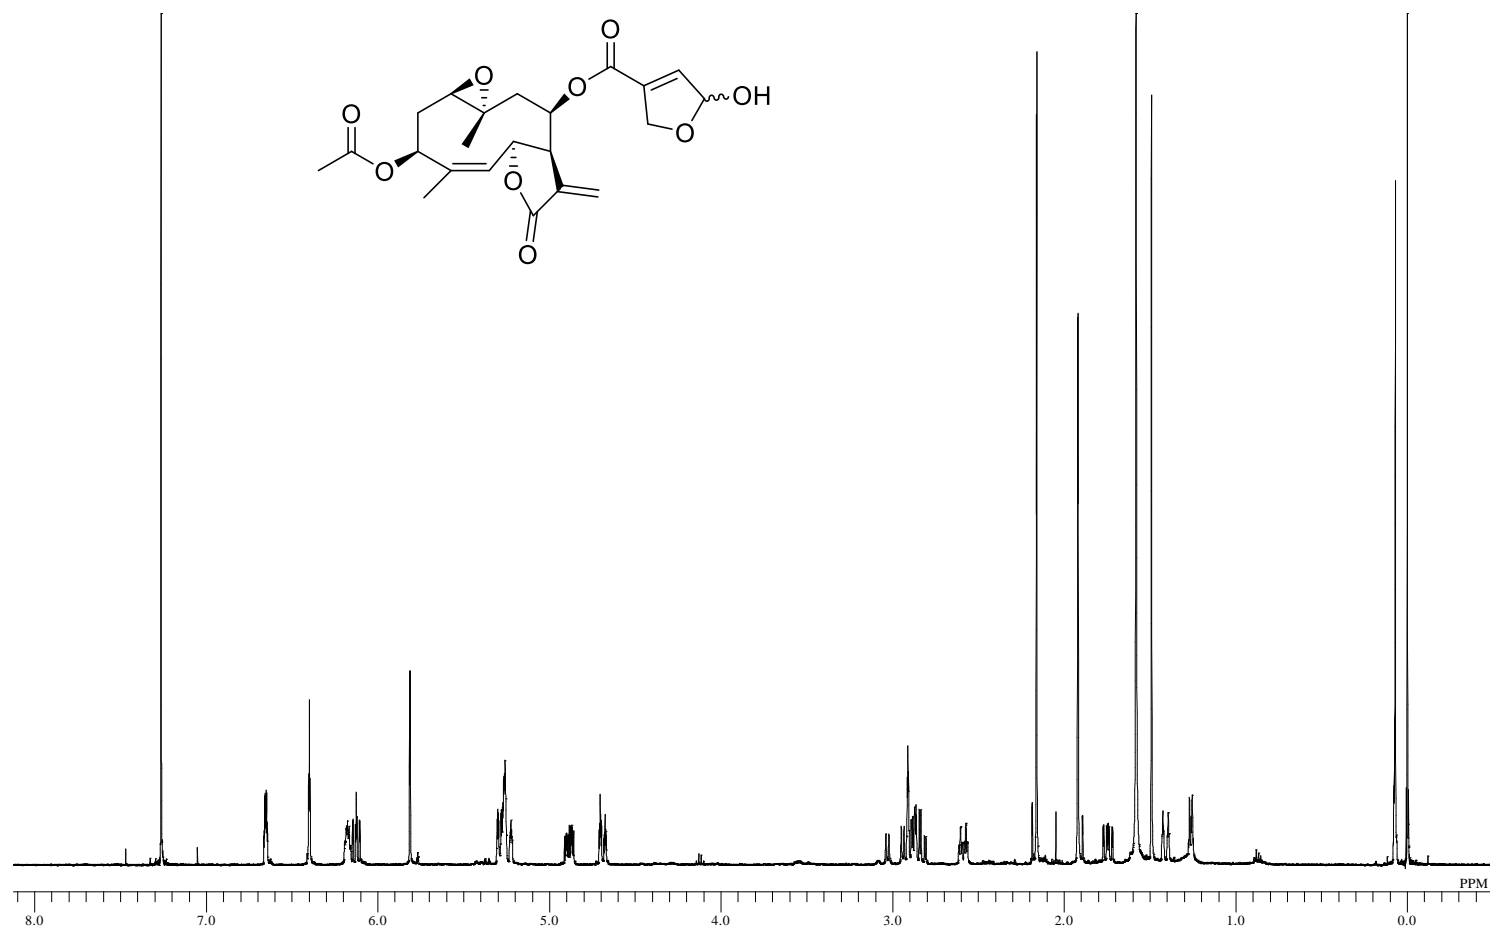

**Figure S22.**  $^{13}\text{C}$  NMR spectrum of **24** (measured in  $\text{CDCl}_3$ , 126 MHz).

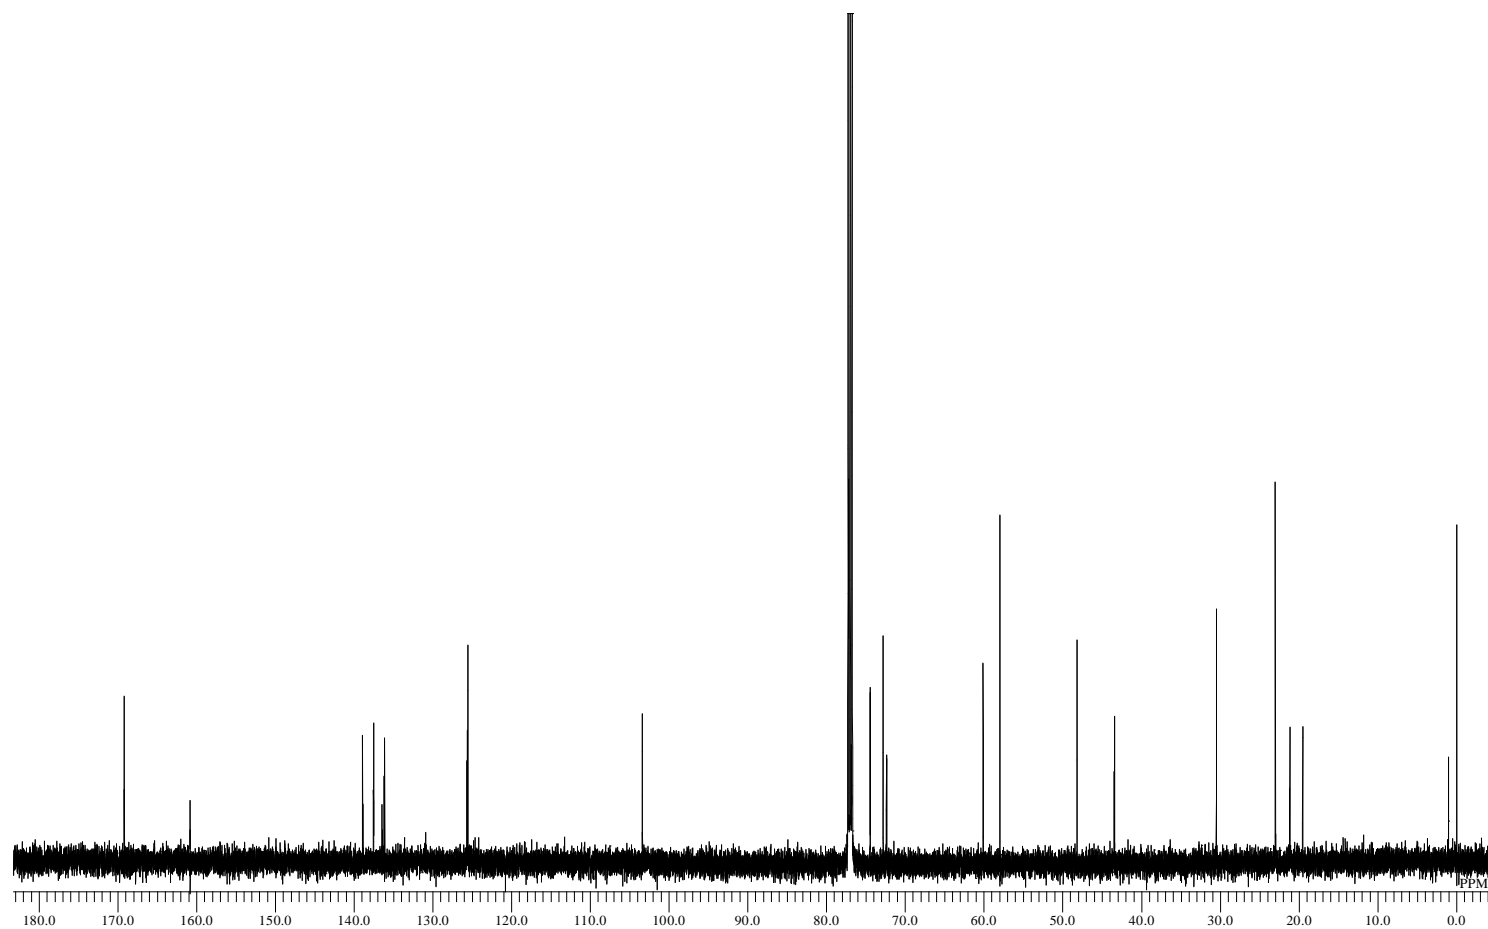

**Figure S23.**  $^1\text{H}$ - $^1\text{H}$  COSY spectrum of **24** (measured in  $\text{CDCl}_3$ , 500 MHz).

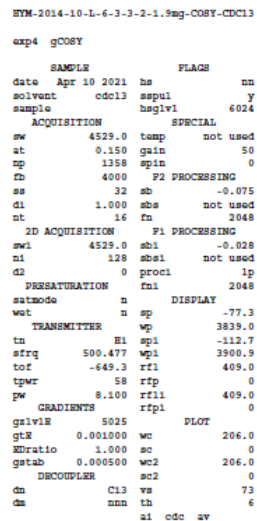

**Figure S24.** HSQC spectrum of **24** (measured in CDCl<sub>3</sub>, 500 MHz).

HYM-2014-10-1-6-3-3-2-1.9mg-HSQC-CDCl3

exp5 HSQCAD

| SAMPLE         |             | FLAGS         |          | ACQUISITION ARRAYS |       |
|----------------|-------------|---------------|----------|--------------------|-------|
| date           | Apr 10 2021 | hs            | nn       | array              | phase |
| solvent        | cdcl3       | aspul         | y        | arraydim           | 256   |
| sample         |             | ppfifig       | y        |                    |       |
| ACQUISITION    | hagivl      | 6024          | 1        | phase              | 1     |
| sw             | 4529.0      | SPHCIAL       | 1        |                    | 1     |
| at             | 0.150       | tamp          | not used | 2                  | 2     |
| up             | 1358        | gain          | 50       |                    |       |
| fb             | 4000        | spin          | 0        |                    |       |
| as             | 32          | F2 PROCESSING |          |                    |       |
| dl             | 1.000       | gf            | 0.069    |                    |       |
| at             | 16          | gfs           | not used |                    |       |
| 2D ACQUISITION | fn          | 2048          |          |                    |       |
| swi            | 25165.1     | F1 PROCESSING |          |                    |       |
| ni             | 128         | gfi           | 0.005    |                    |       |
| phase          | arrayed     | gfsl          | not used |                    |       |
| PRESSATURATION | procl       | lp            |          |                    |       |
| satmode        | n           | fnl           | 2048     |                    |       |
| wet            | n           | DISPLAY       | -24.2    |                    |       |
| TRANSMITTER    | sp          | BI            | 3741.7   |                    |       |
| tn             | 500.477     | sp1           | -273.5   |                    |       |
| tofr           | -649.3      | wp1           | 19611.1  |                    |       |
| tpwr           | 58          | rfl           | 409.0    |                    |       |
| pw             | 8.100       | rfl           | 0        |                    |       |
| DRCOUPLER      | Cl3         | rfl1          | 1256.5   |                    |       |
| dn             | -600.6      | rfl1          | 0        |                    |       |
| dm             | nny         | wc            | 206.0    |                    |       |
| decwave        | W40_BCNsm   | sc            | 0        |                    |       |
| dmf            | 32258       | wc2           | 206.0    |                    |       |
| dpwr           | 38          | sc2           | 0        |                    |       |
| pxwvl          | 56          | va            | 73       |                    |       |
| pxz            | 10.500      | th            | 3        |                    |       |
| HSQC           | ai          | cdc           | ph       |                    |       |
| j1xh           | 146.0       |               |          |                    |       |
| multifig       | y           |               |          |                    |       |
| mult           | 2           |               |          |                    |       |
| ADIABATIC      |             |               |          |                    |       |
| pxw180ad       | ONE         | ad300         |          |                    |       |
| pxw180adr      | ONE         | ad30-         |          |                    |       |
| OR             |             |               |          |                    |       |
| pxw180         | 465.4       |               |          |                    |       |
| pxw1v1180      | 51          |               |          |                    |       |
| pxw180ref      | ONE         | ref2-         |          |                    |       |
| OR             |             |               |          |                    |       |
| pxw180r        | 2000.2      |               |          |                    |       |
| pxw1v1180r     | 43          |               |          |                    |       |

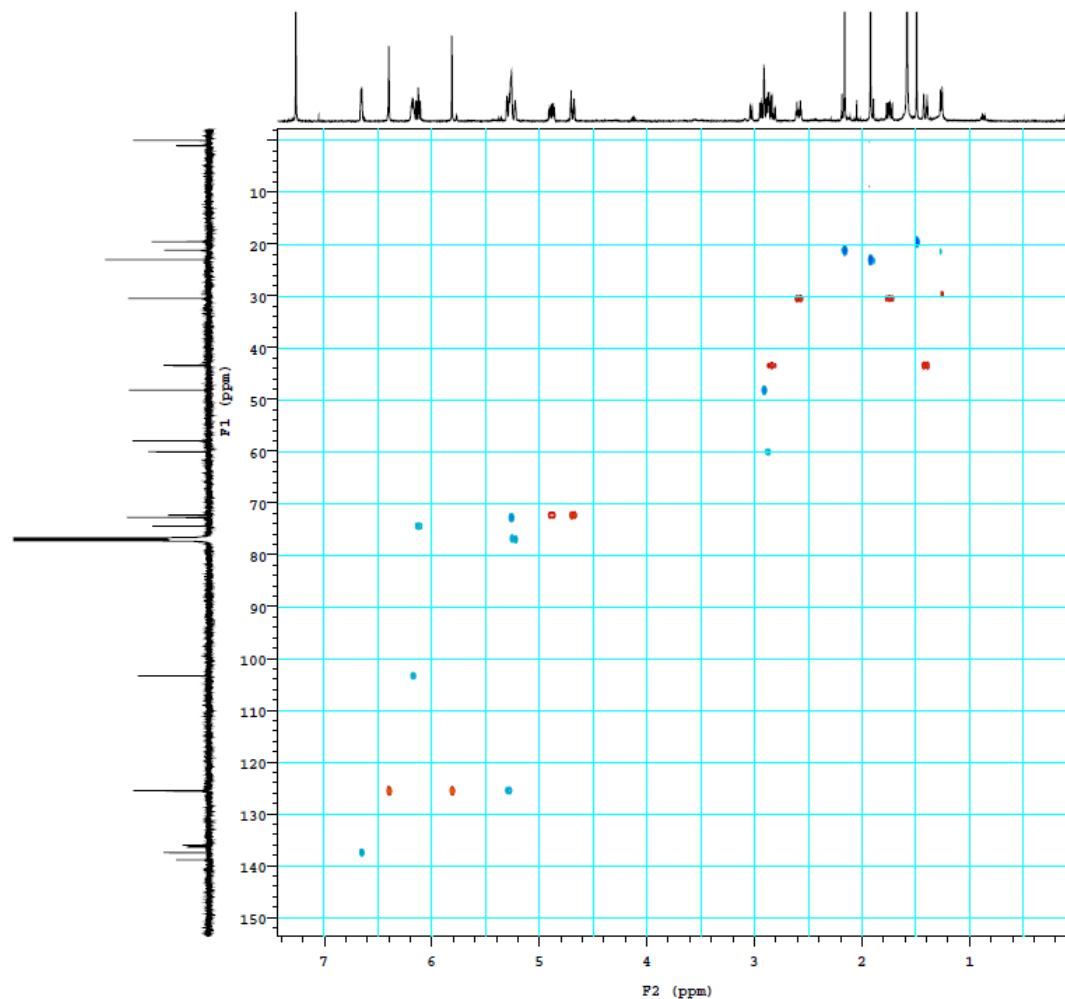



**Figure S25.** HMBC spectrum of **24** (measured in CDCl<sub>3</sub>, 500 MHz).

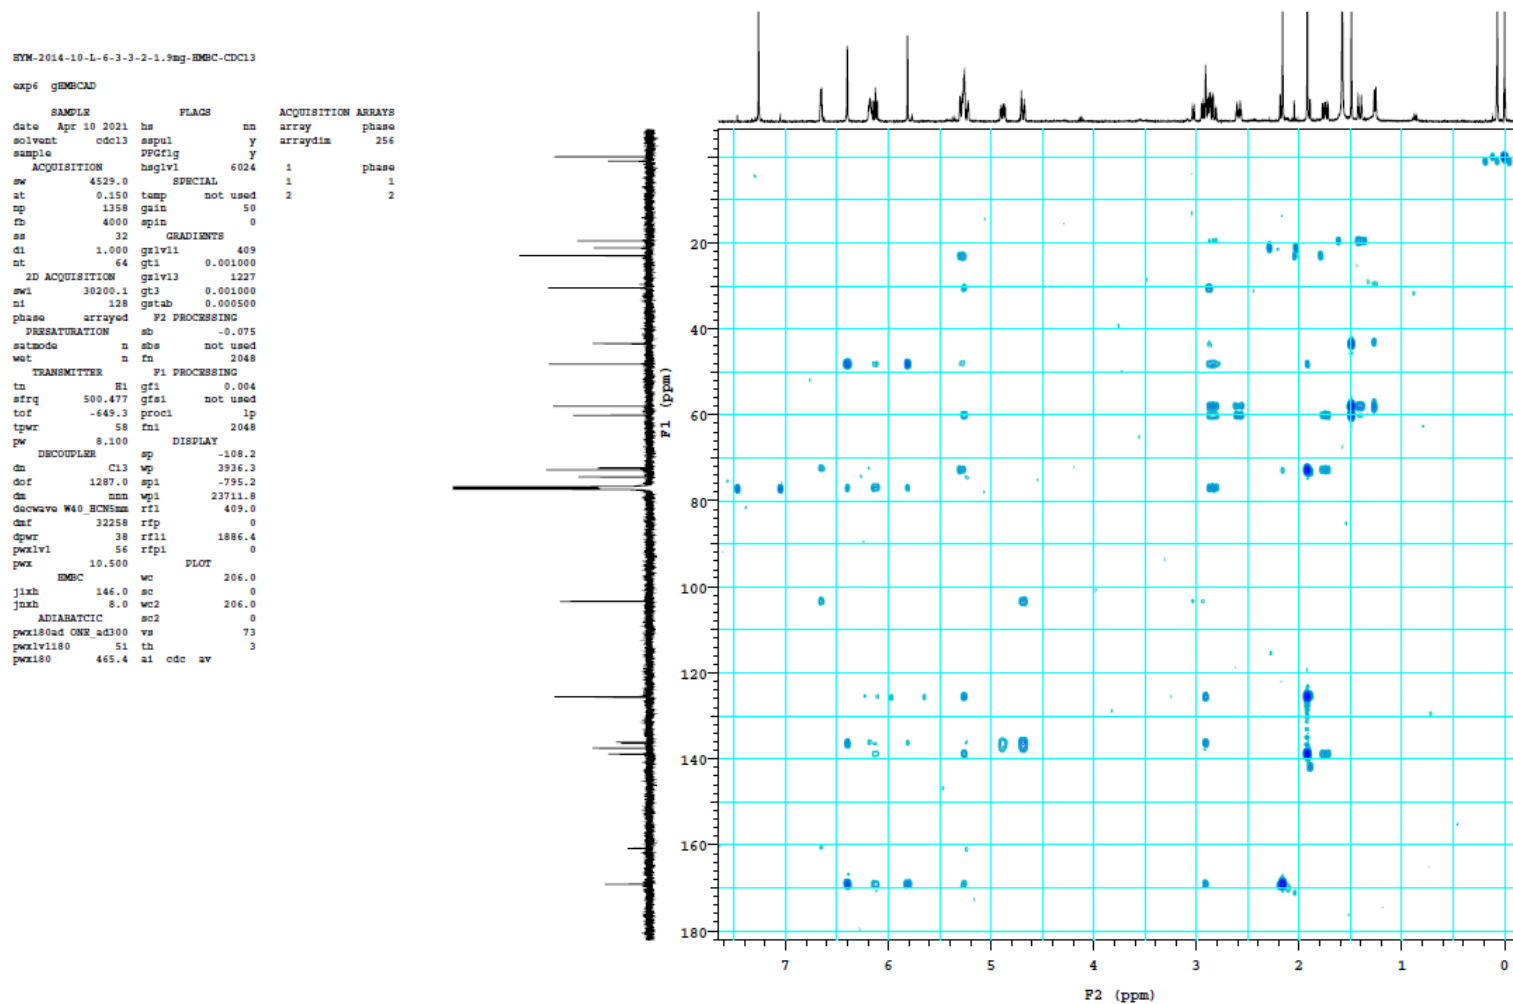

**Figure S26.** NOESY spectrum of **24** (measured in CDCl<sub>3</sub>, 500 MHz).

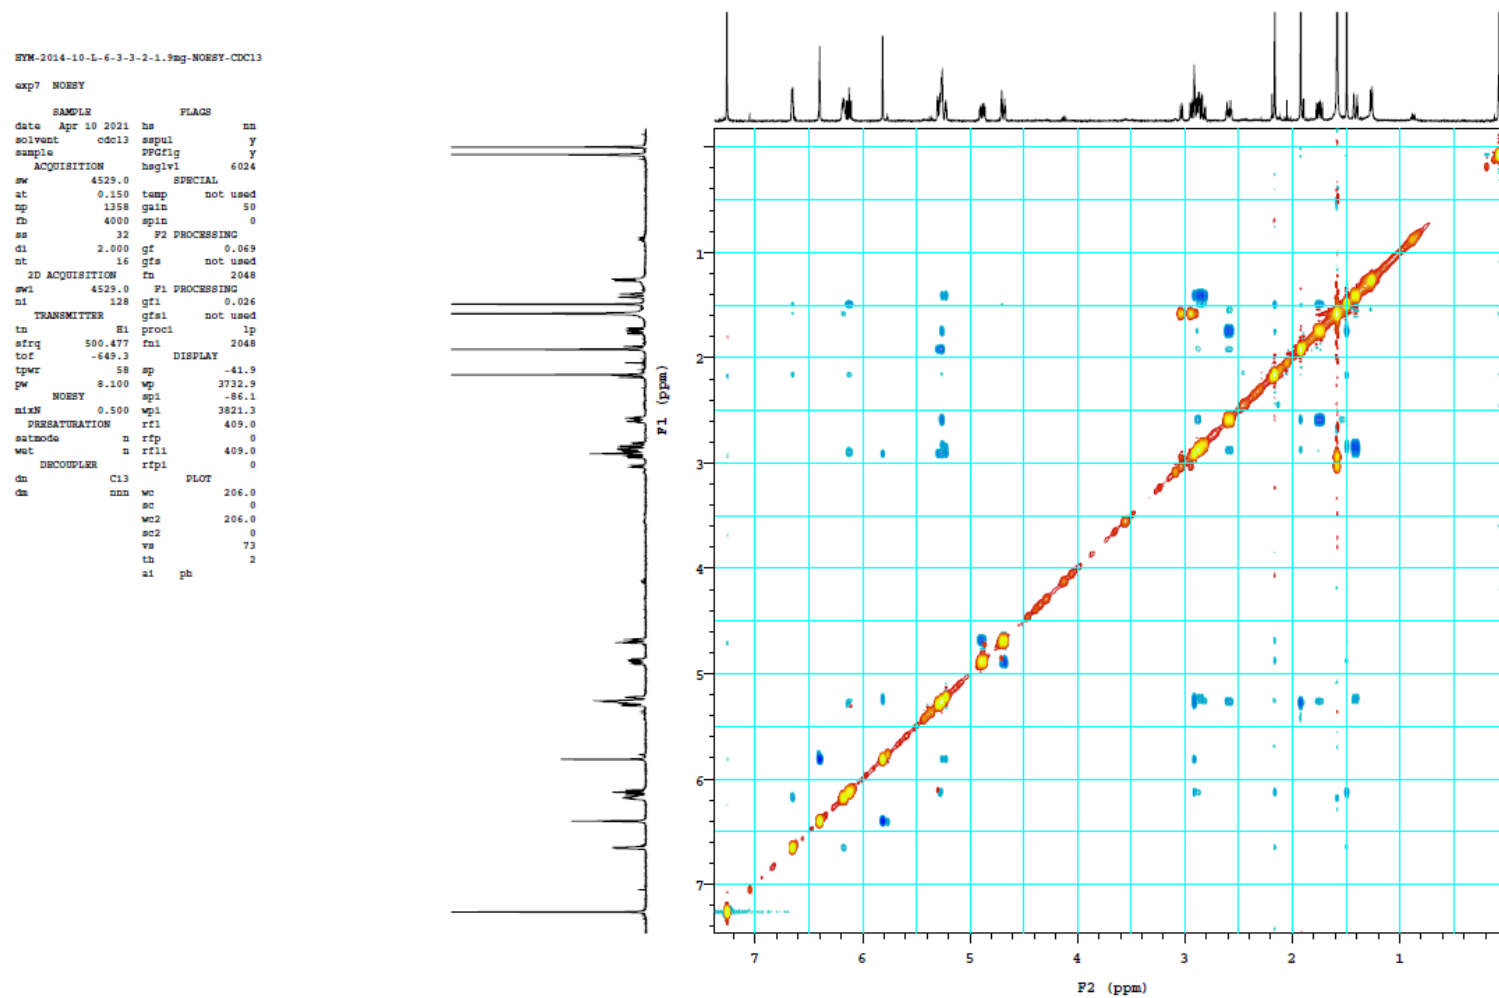

**Figure S27.**  $^1\text{H}$  NMR spectrum of **31** (measured in  $\text{CDCl}_3$ , 500 MHz).

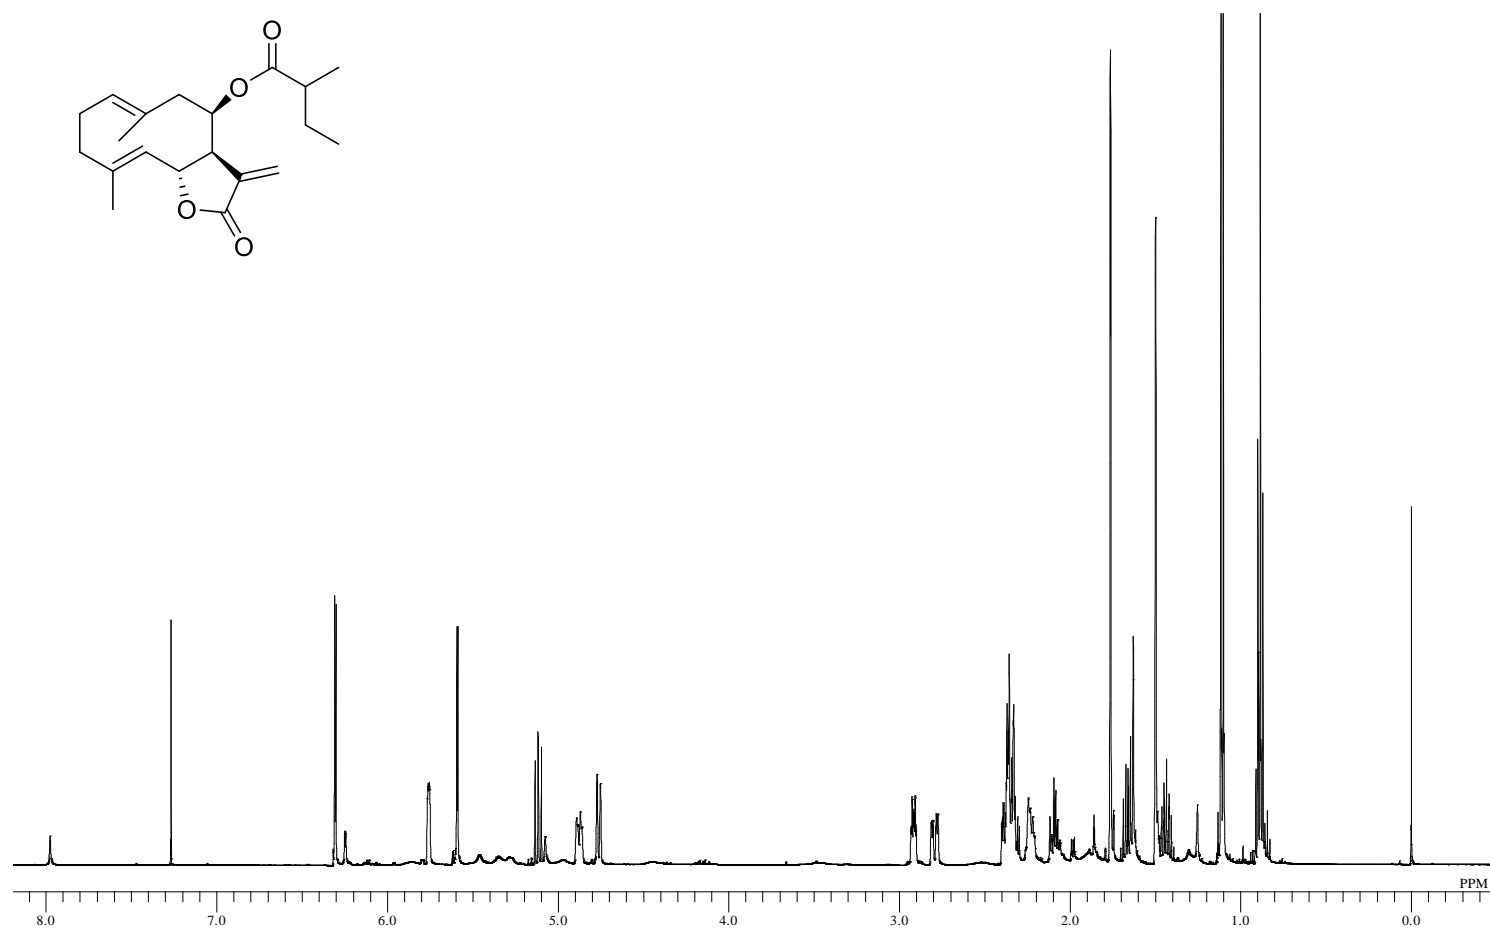

**Figure S28.**  $^{13}\text{C}$  NMR spectrum of **31** (measured in  $\text{CDCl}_3$ , 126 MHz).

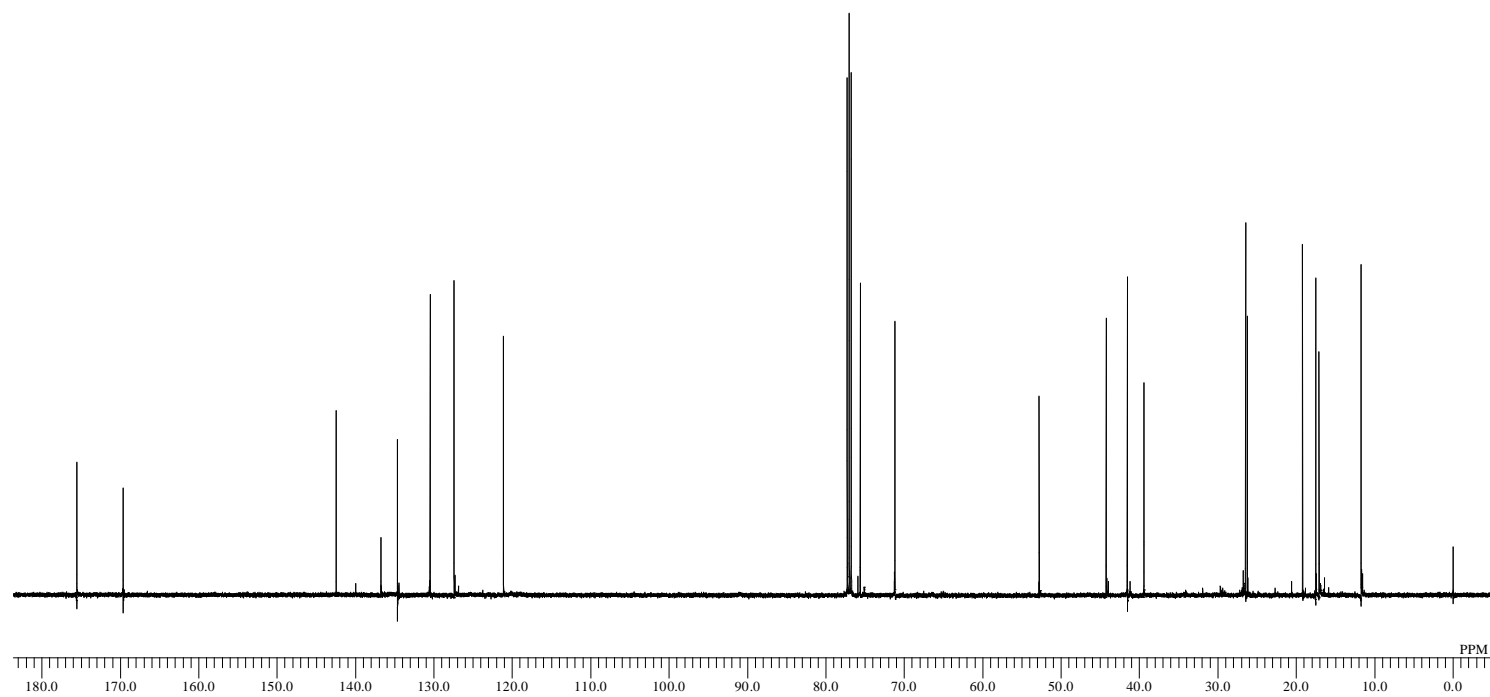

**Figure S29.**  $^1\text{H}$ - $^1\text{H}$  COSY spectrum of **31** (measured in  $\text{CDCl}_3$ , 500 MHz).

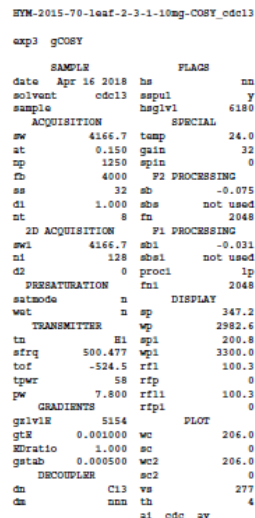

**Figure S30.** HSQC spectrum of **31** (measured in CDCl<sub>3</sub>, 500 MHz).

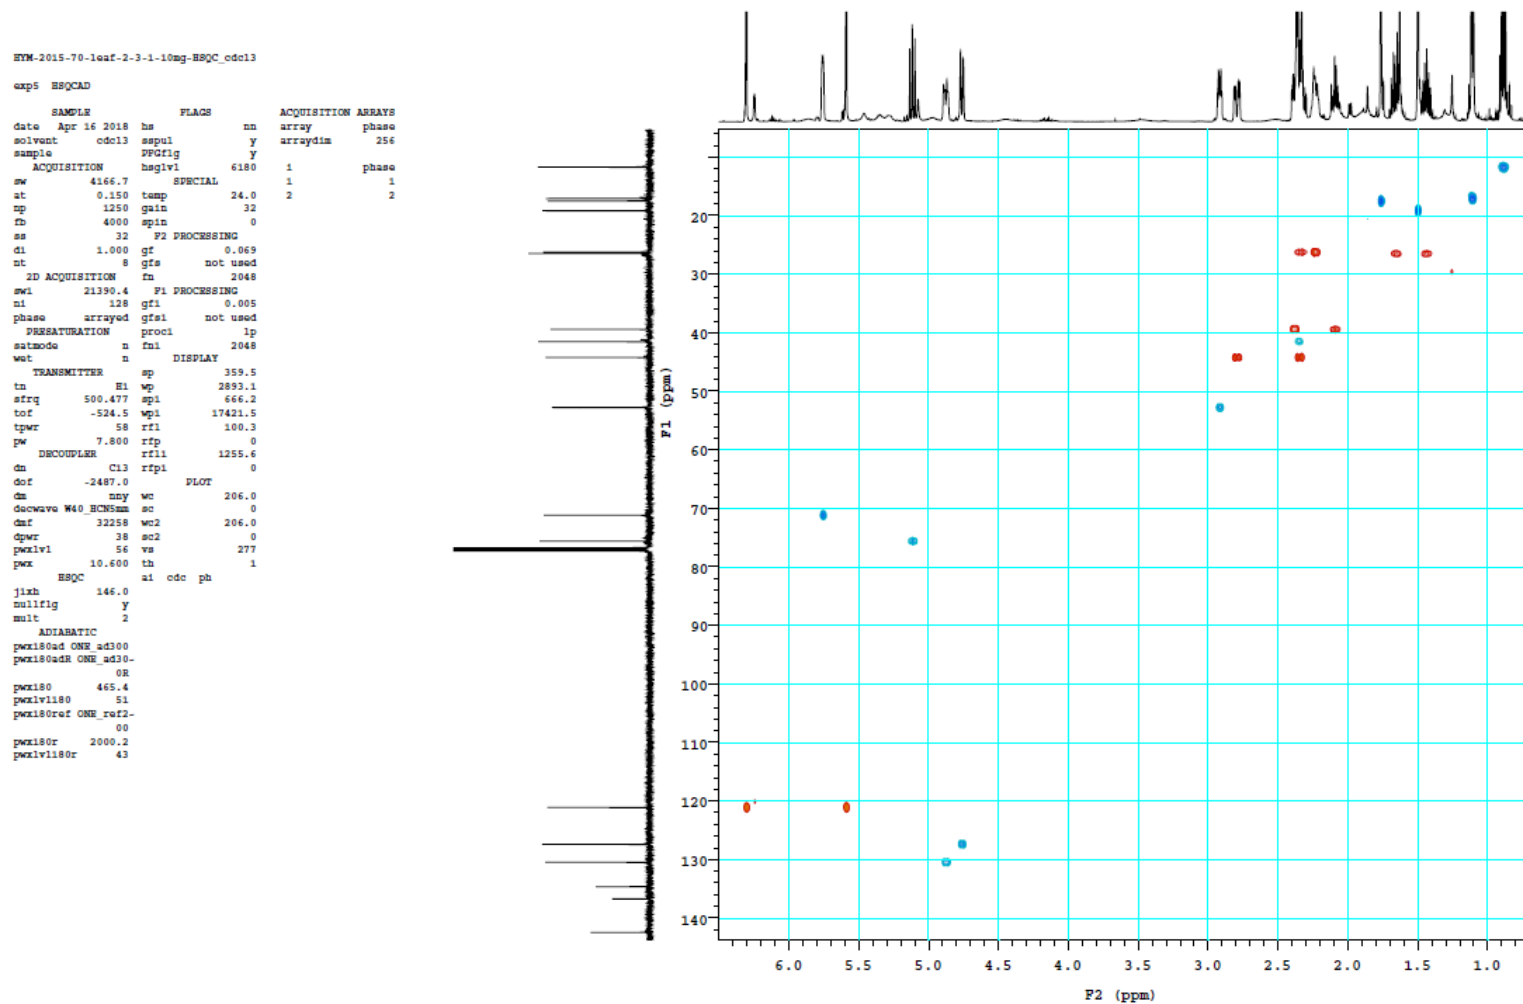

**Figure S31.** HMBC spectrum of **31** (measured in CDCl<sub>3</sub>, 500 MHz).

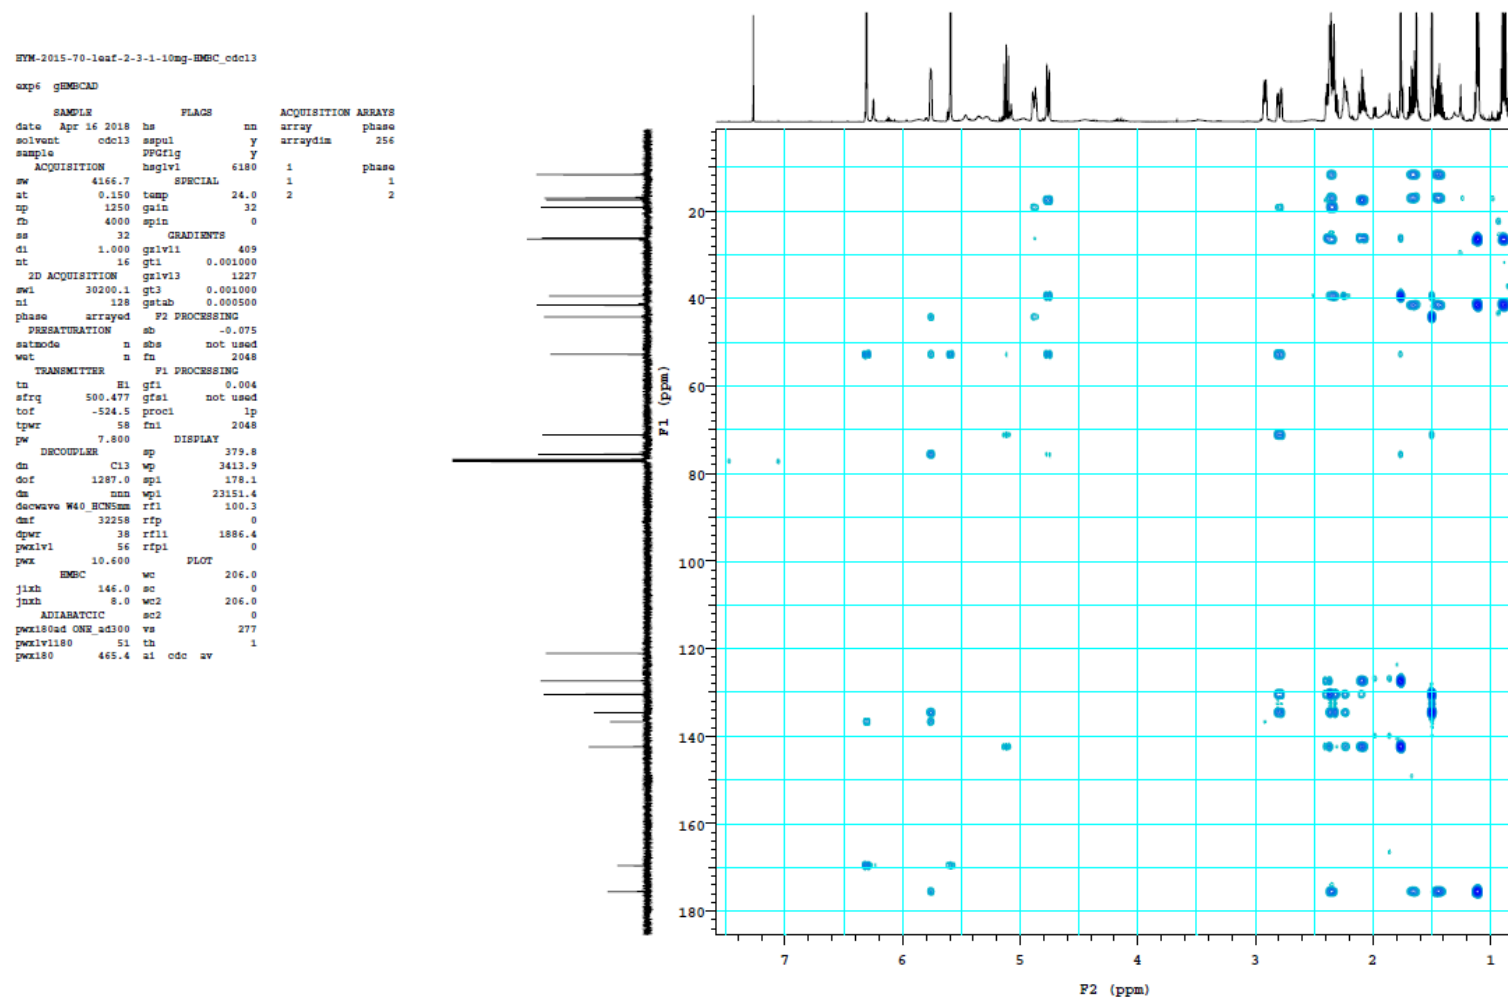

**Figure S32.** NOESY spectrum of **31** (measured in CDCl<sub>3</sub>, 500 MHz).

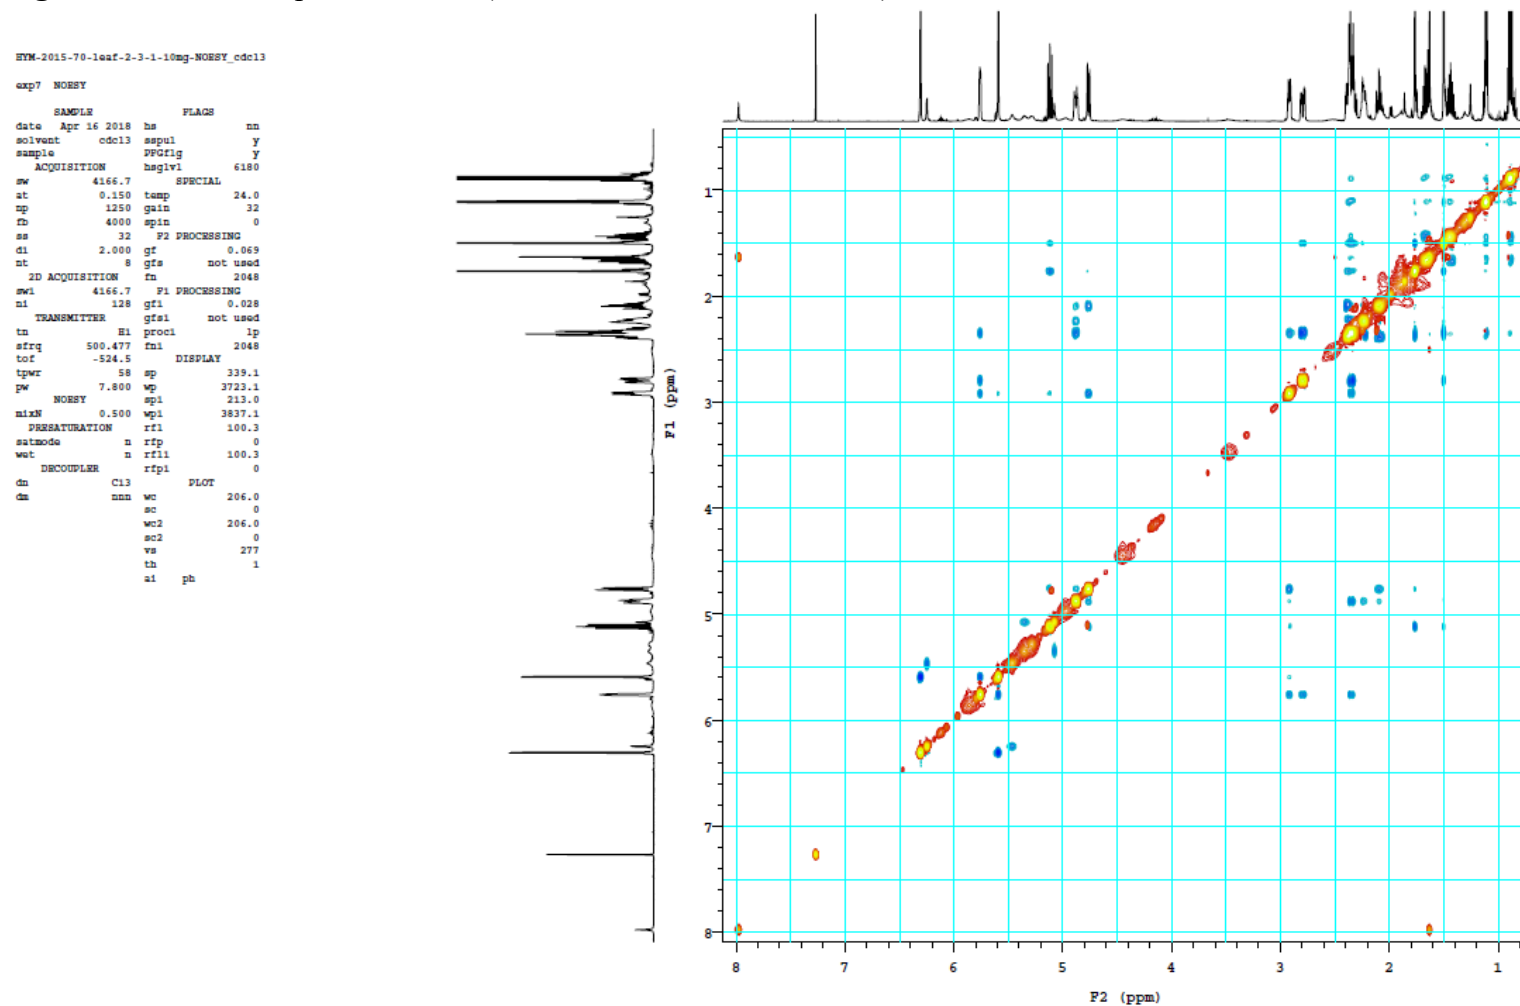



**Figure S33.**  $^1\text{H}$  NMR spectrum of **36** (measured in  $\text{CDCl}_3$ , 500 MHz, 298 K).

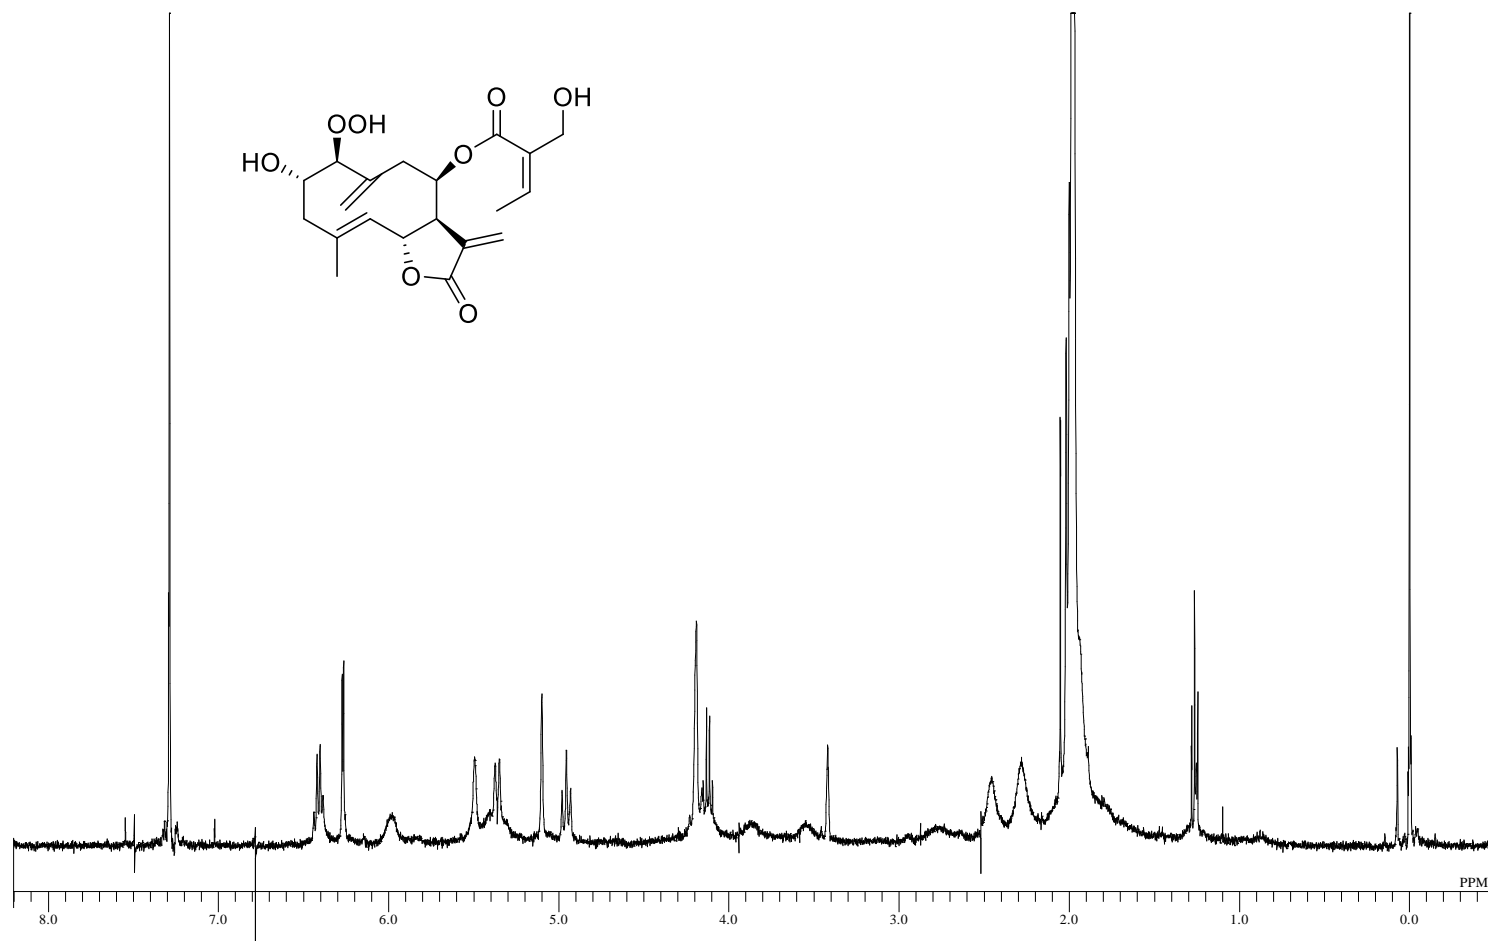

**Figure S34.**  $^1\text{H}$  NMR spectrum of **36** (measured in  $\text{CDCl}_3$ , 400 MHz, 233 K).

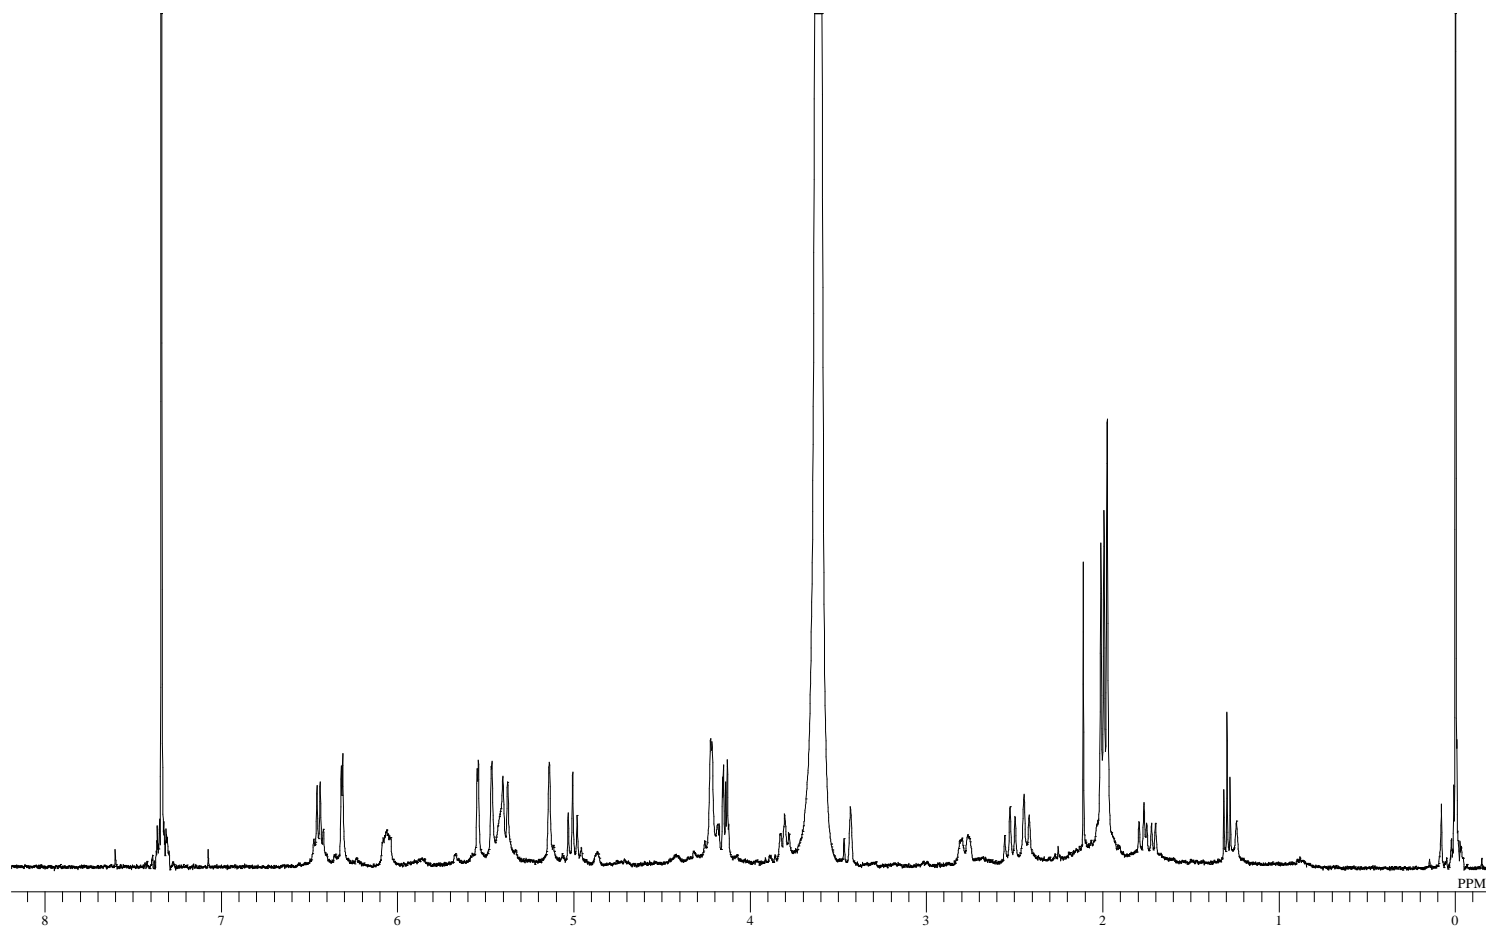

**Figure S35.**  $^{13}\text{C}$  NMR spectrum of **36** (measured in  $\text{CDCl}_3$ , 100 MHz, 233 K).

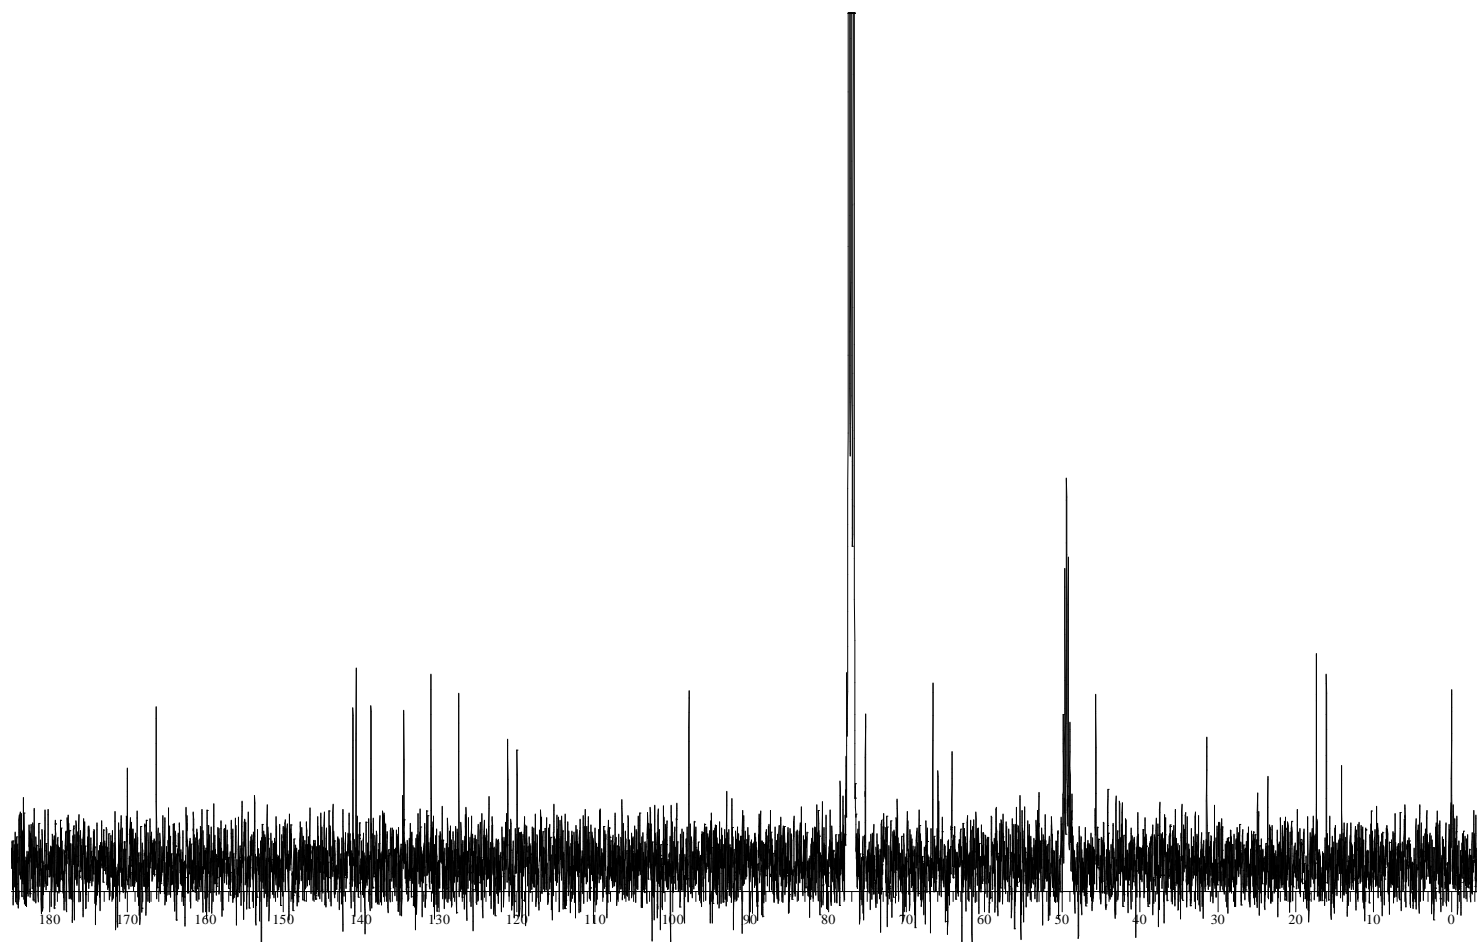

**Figure S36.**  $^1\text{H}$ - $^1\text{H}$  COSY spectrum of **36** (measured in  $\text{CDCl}_3$ , 400 MHz, 233 K).

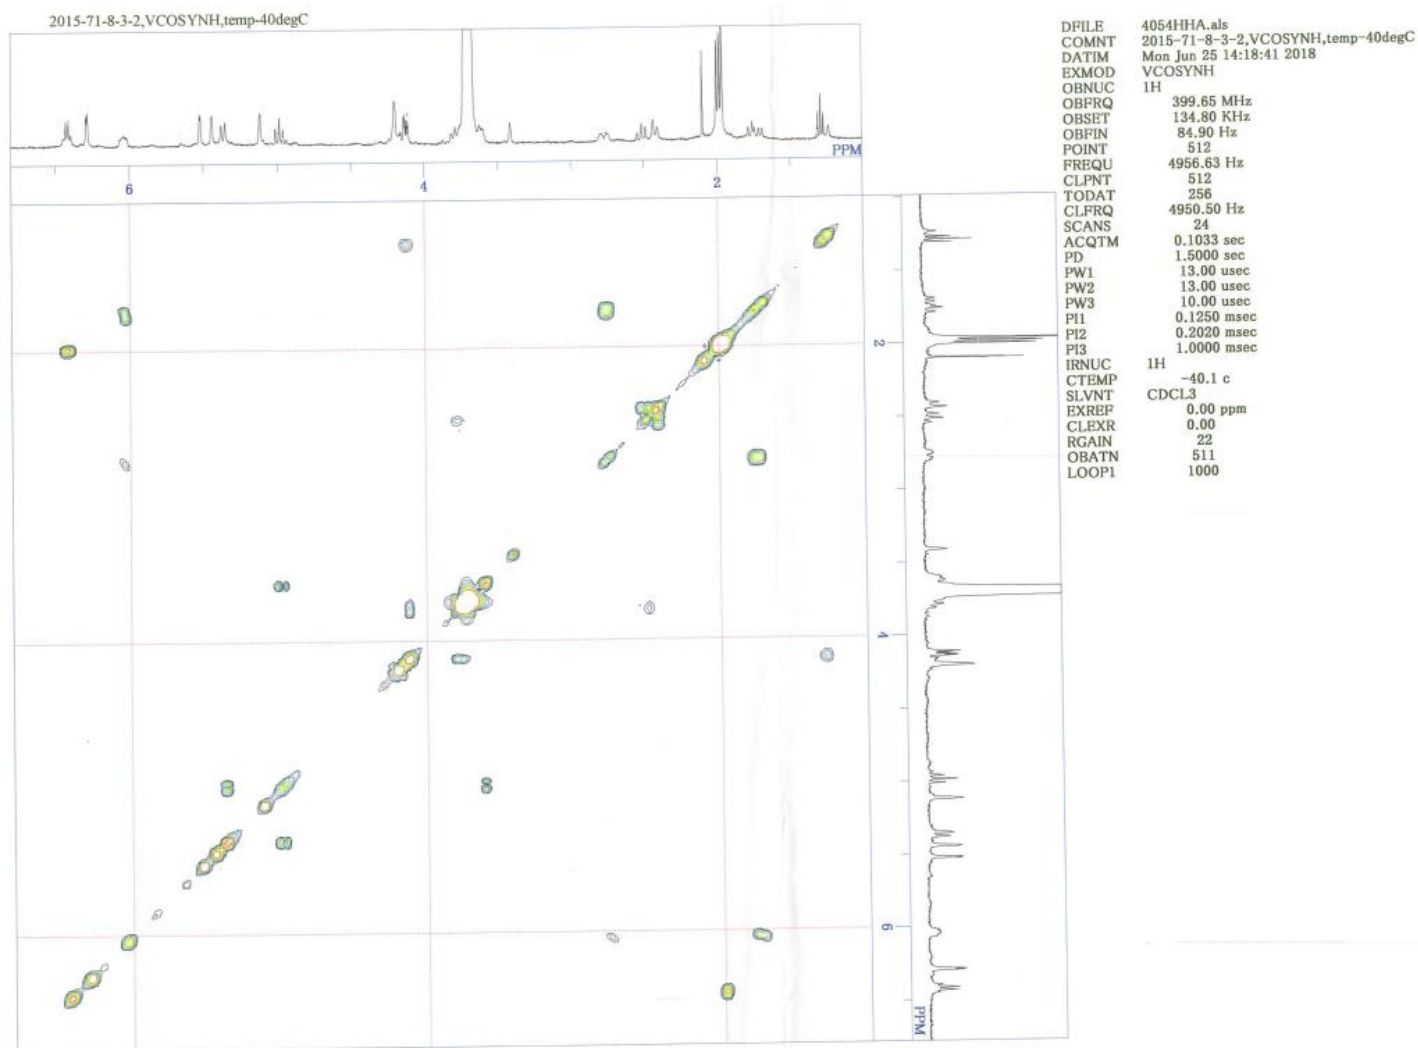

**Figure S37.** HSQC spectrum of **36** (measured in CDCl<sub>3</sub>, 400 MHz, 233 K).

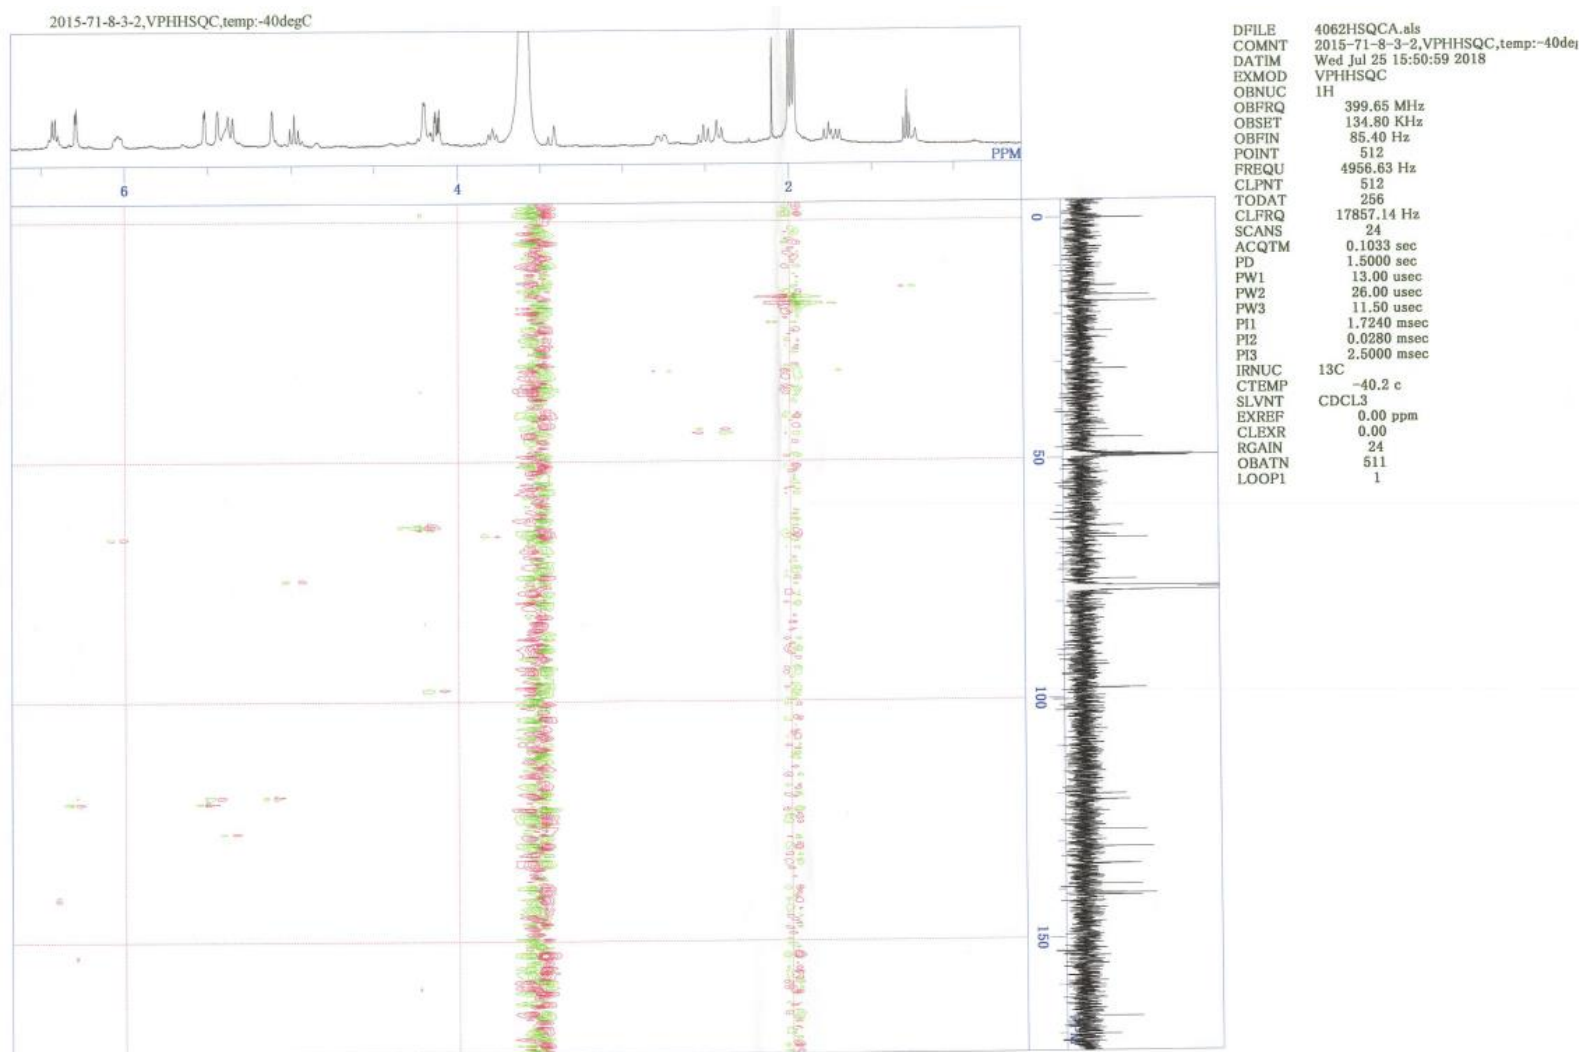

**Figure S38.** HMBC spectrum of **36** (measured in CDCl<sub>3</sub>, 400 MHz, 233 K).

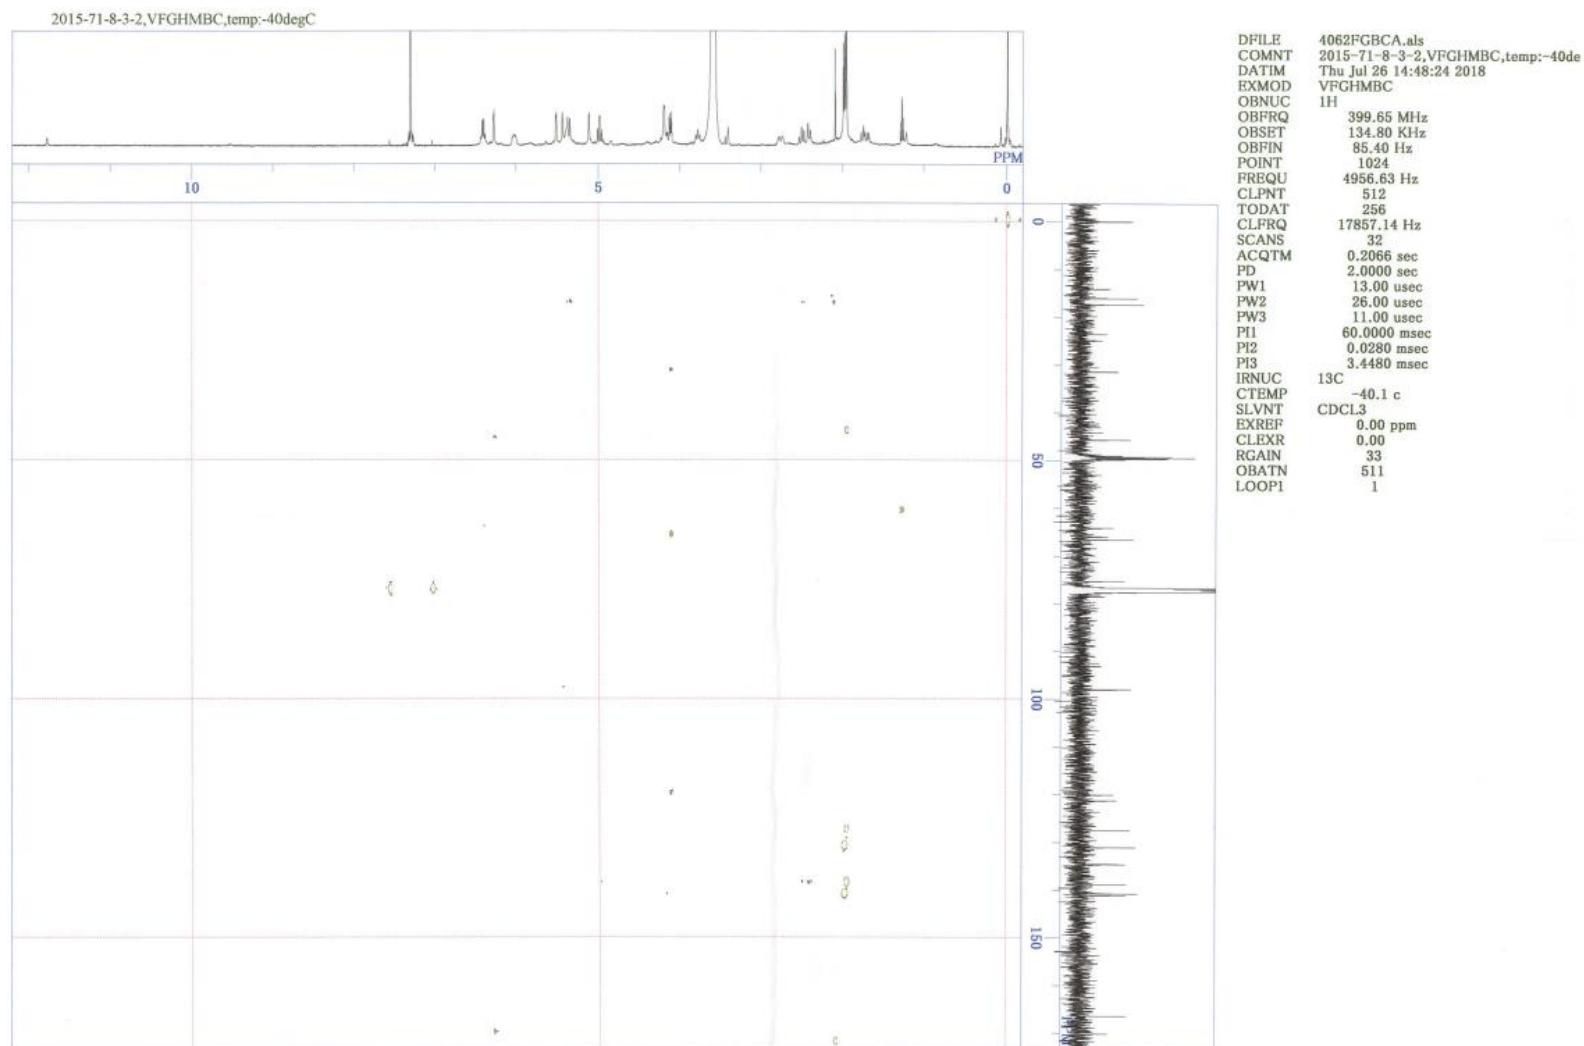

**Figure S39.** NOESY spectrum of **36** (measured in CDCl<sub>3</sub>, 400 MHz, 233 K).

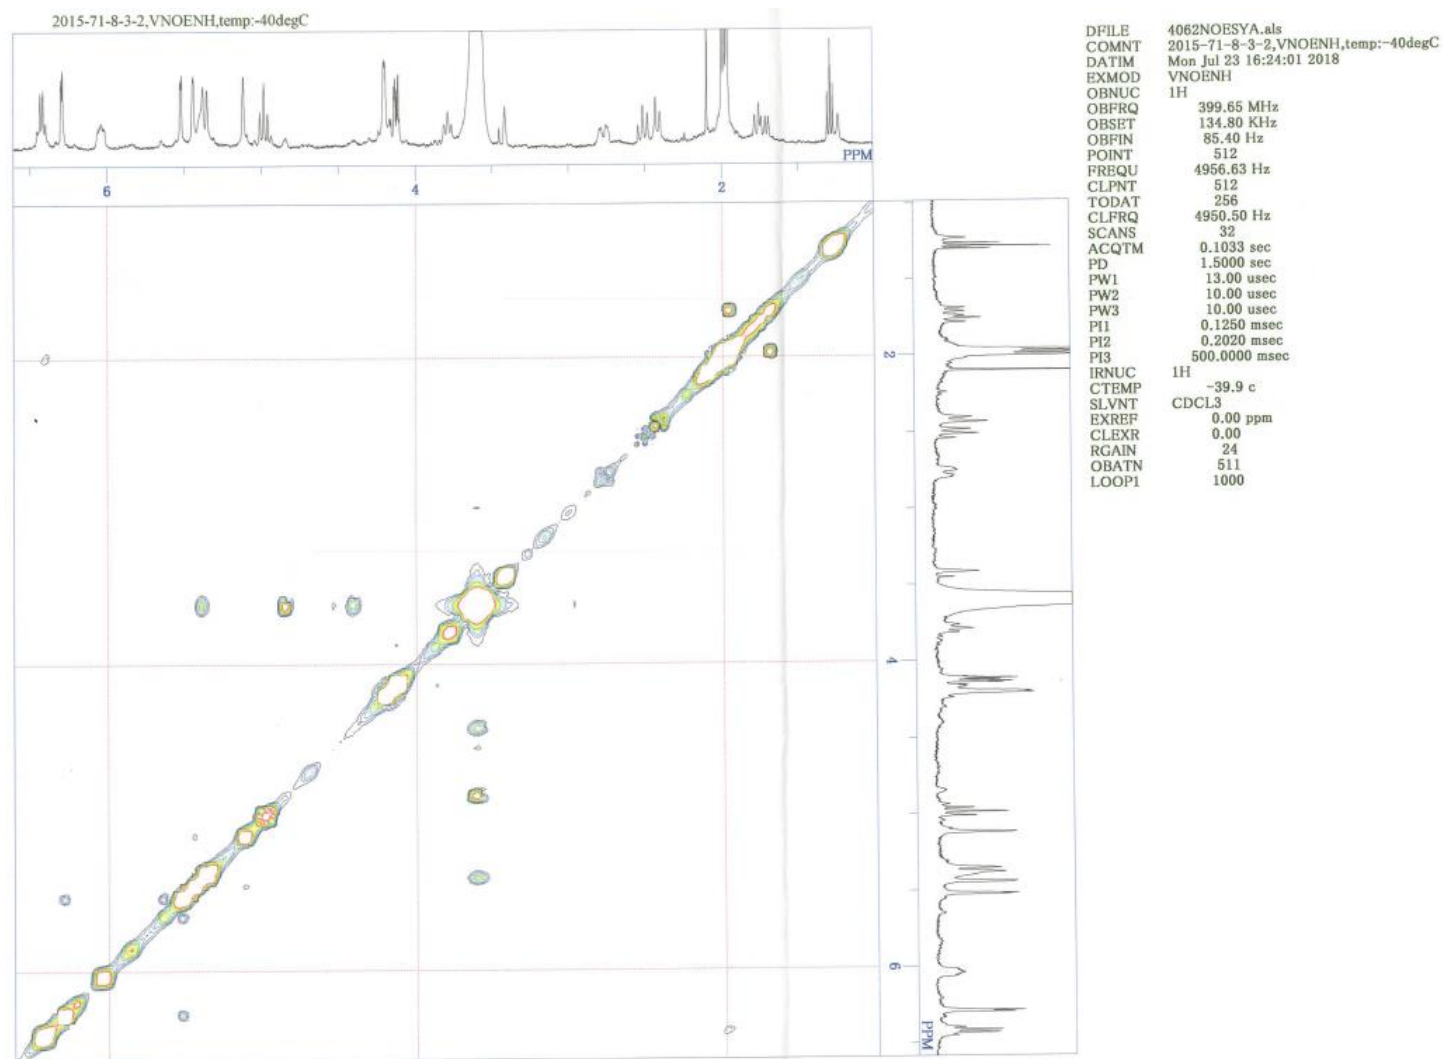

**Figure S40.**  $^1\text{H}$  NMR spectrum of **40** (measured in  $\text{CDCl}_3$ , 500 MHz, 298 K).

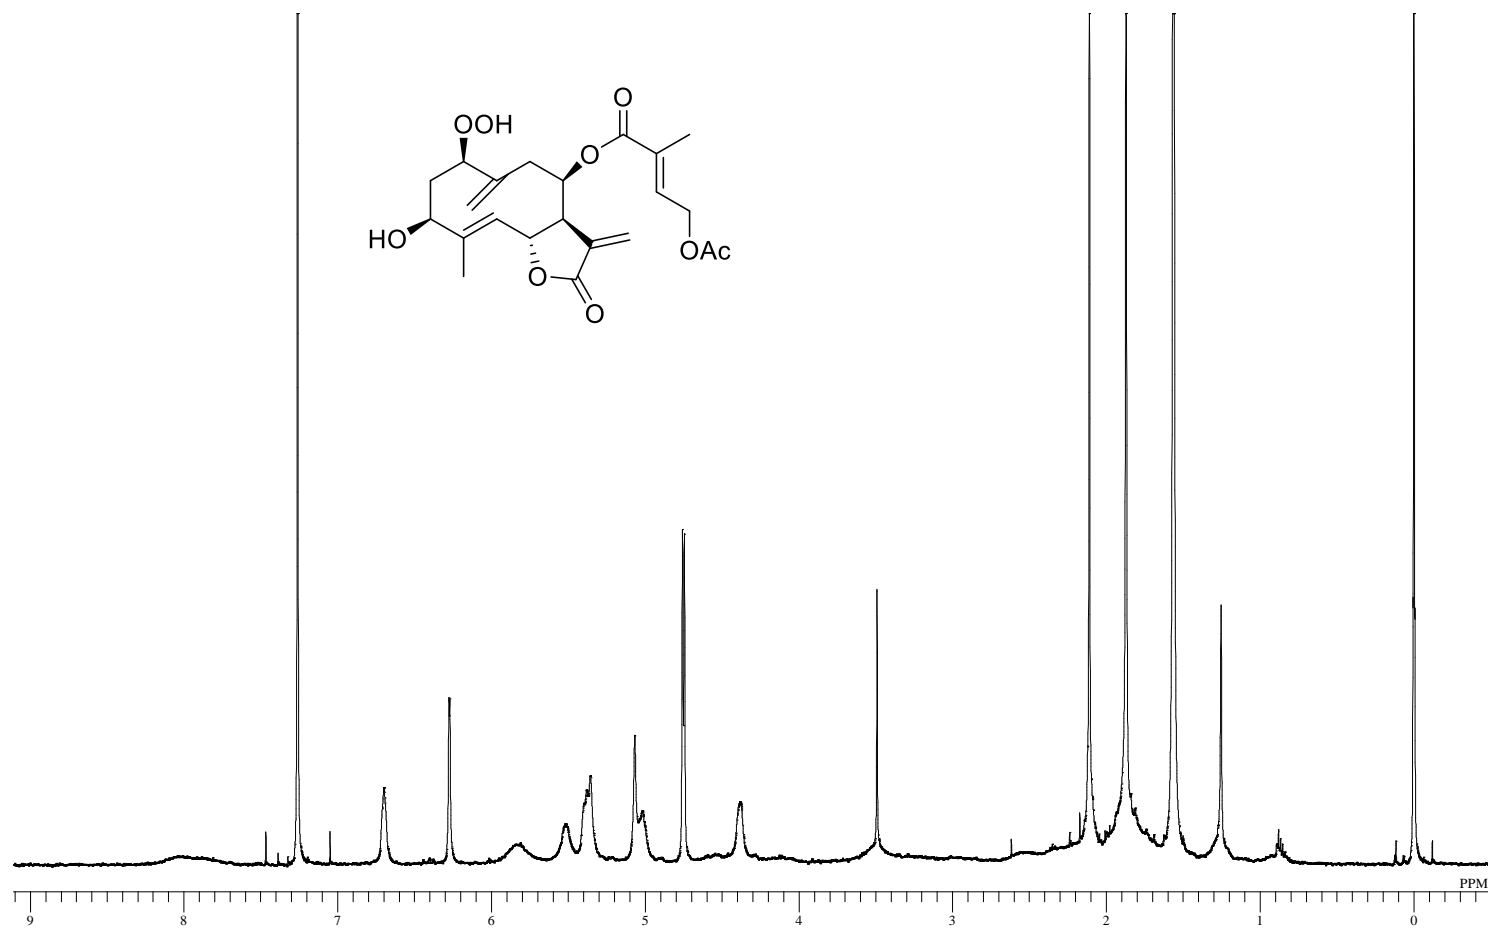



**Figure S41.**  $^1\text{H}$  NMR spectrum of **40** (measured in  $\text{CDCl}_3$ , 400 MHz, 233 K).

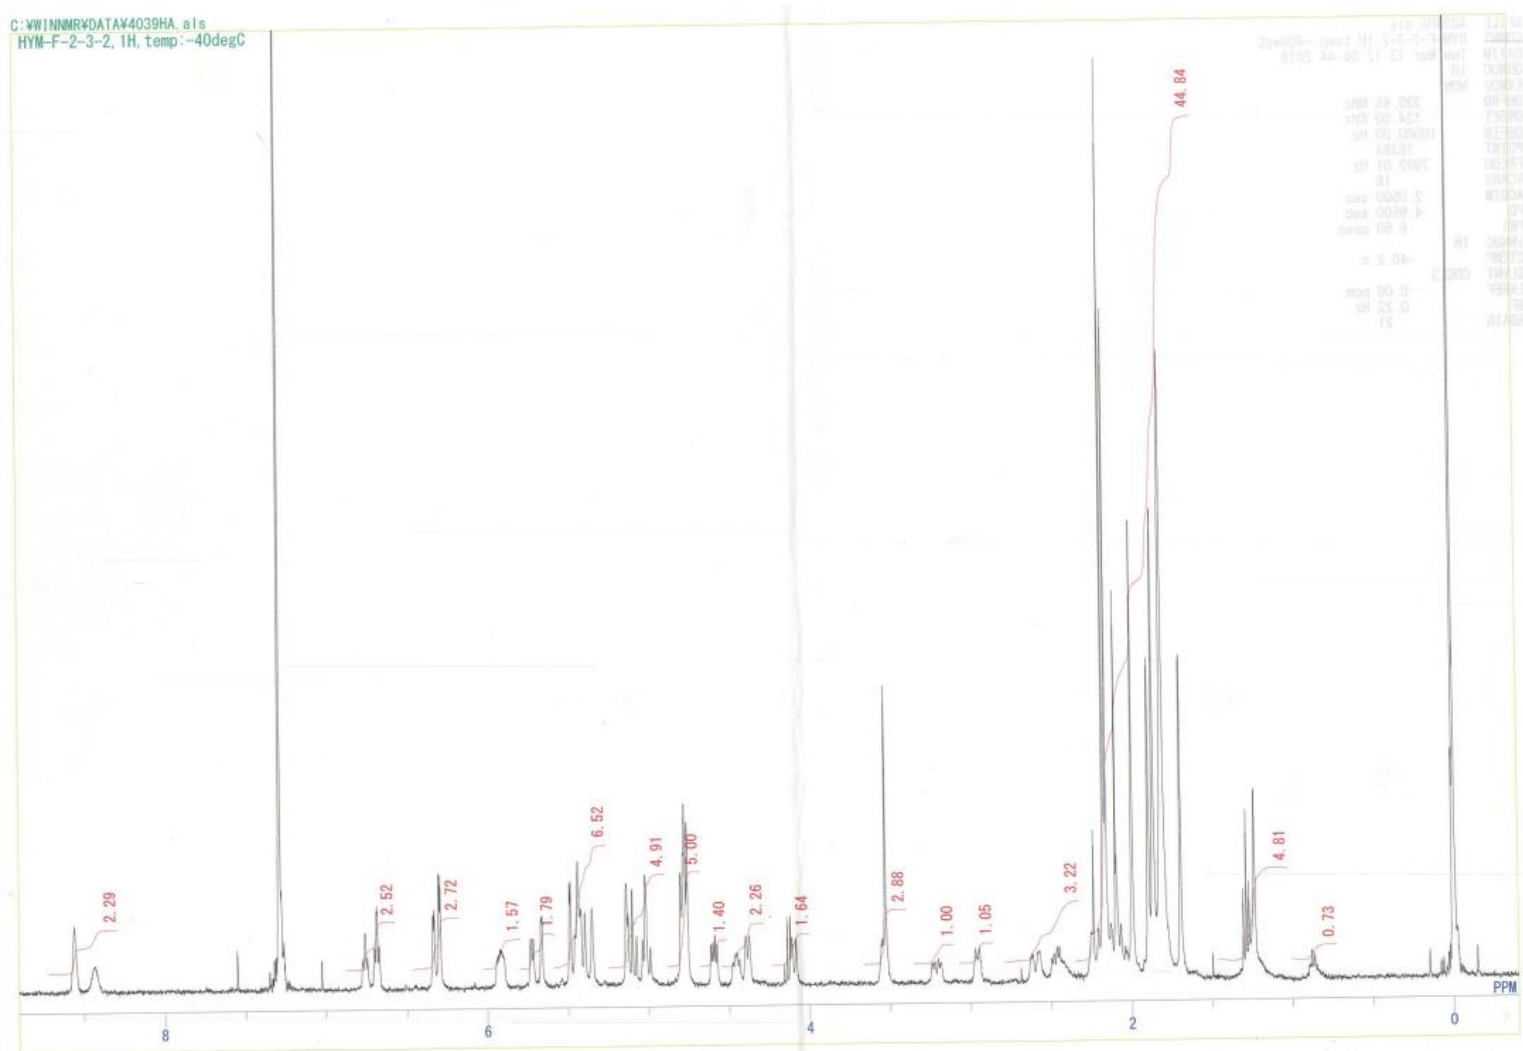

**Figure S42.**  $^1\text{H}$ - $^1\text{H}$  COSY spectrum of **40** (measured in  $\text{CDCl}_3$ , 400 MHz, 233 K).

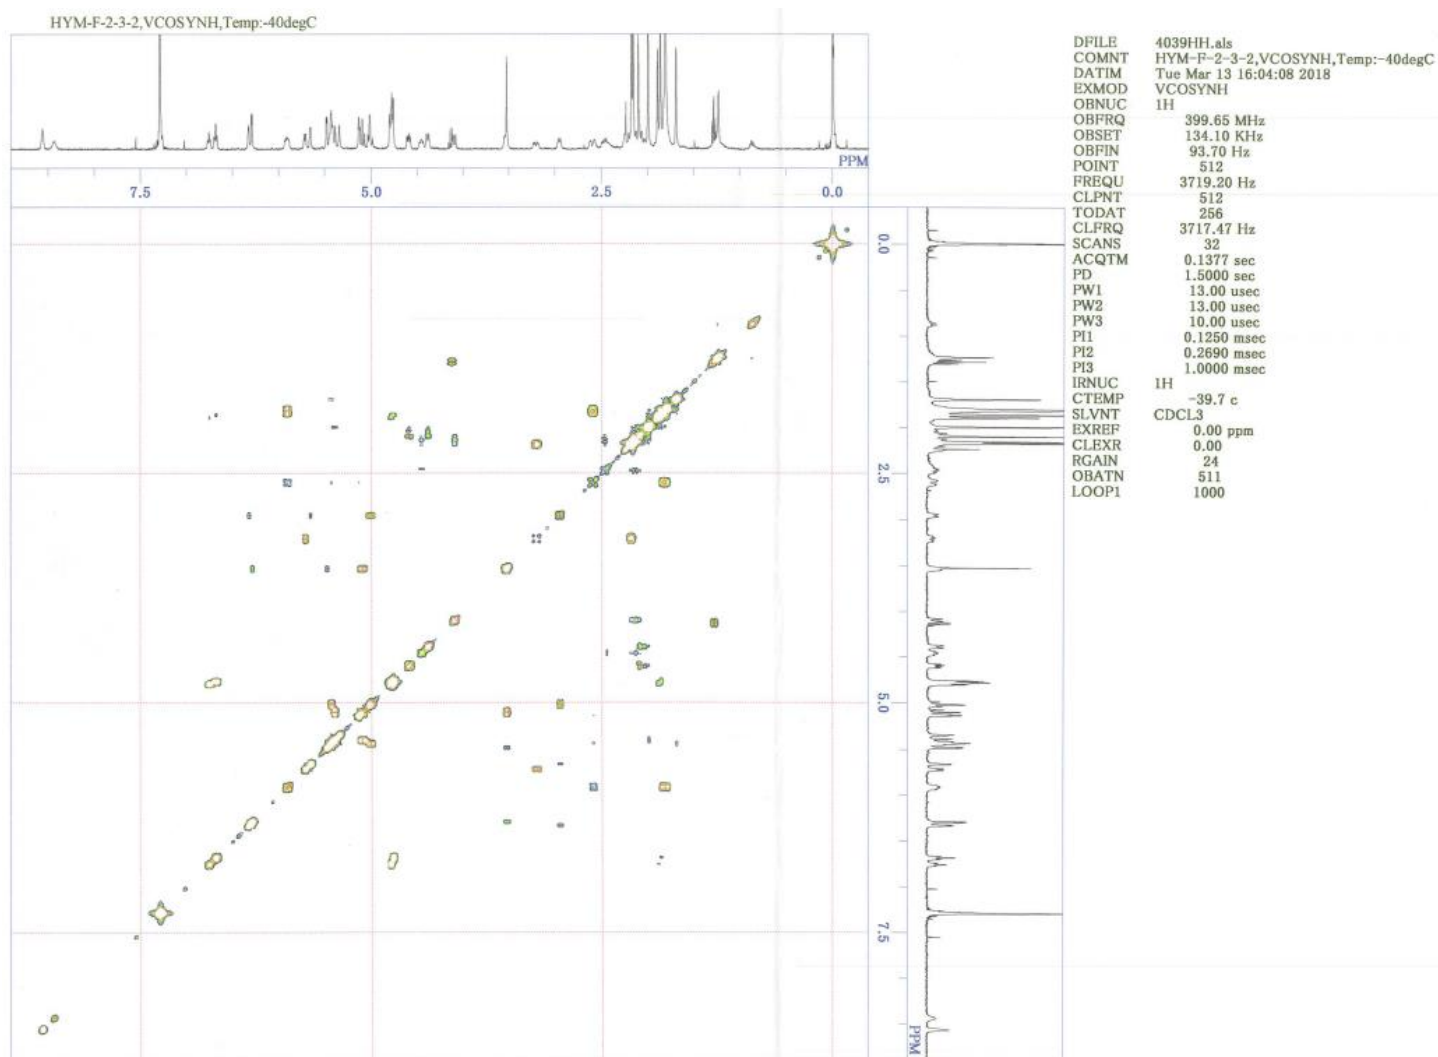

**Figure S43.**  $^1\text{H}$  NMR spectrum of **45** (measured in  $\text{CDCl}_3$ , 500 MHz).

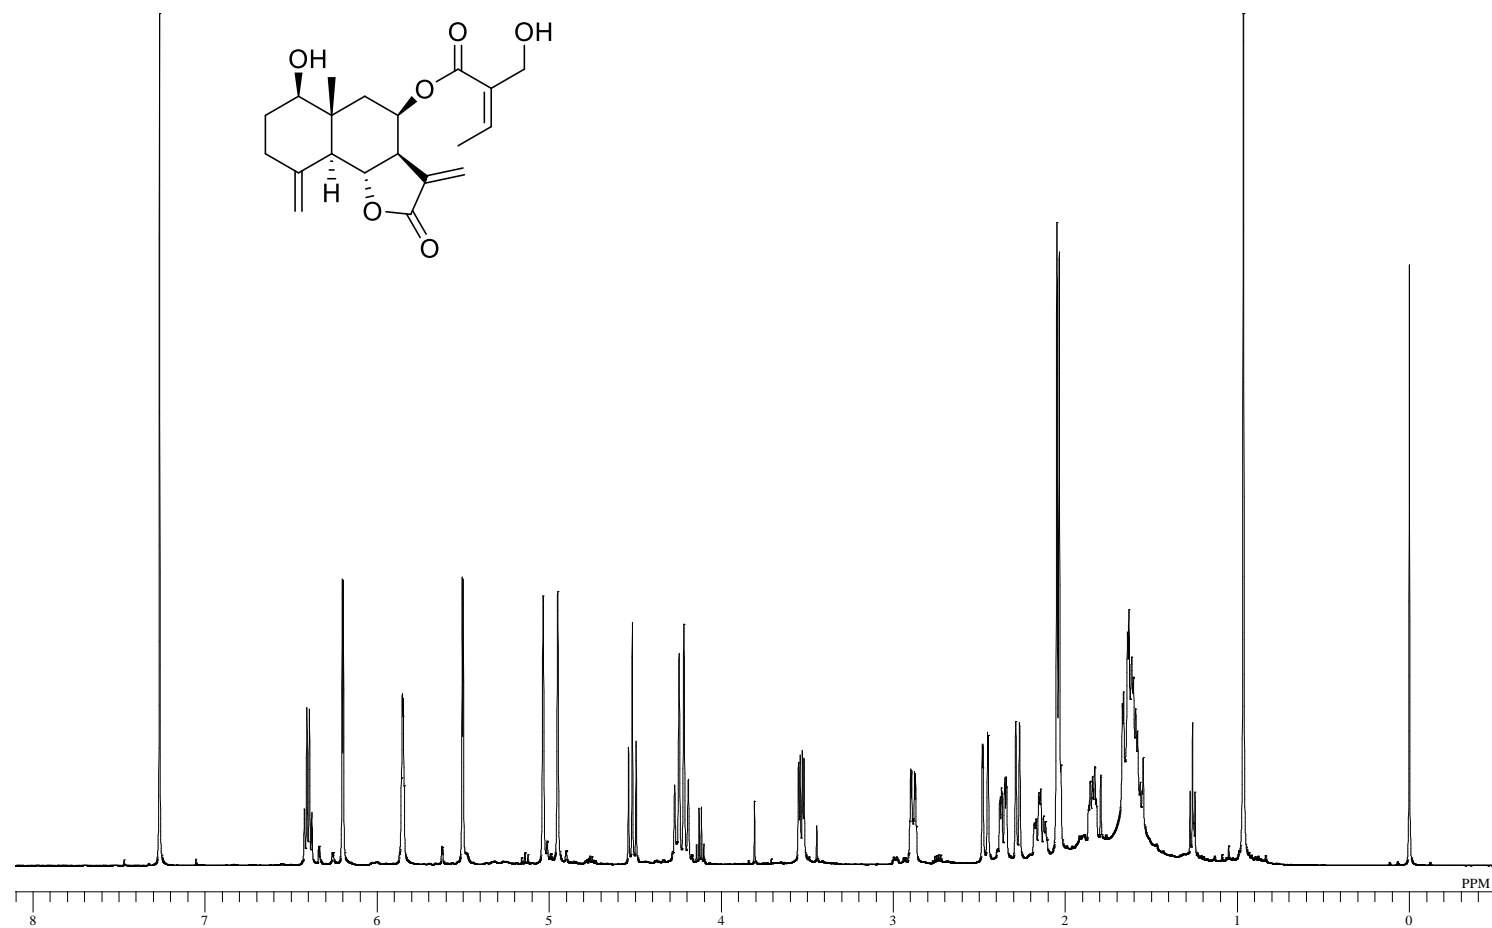

**Figure S44.**  $^{13}\text{C}$  NMR spectrum of **45** (measured in  $\text{CDCl}_3$ , 126 MHz).

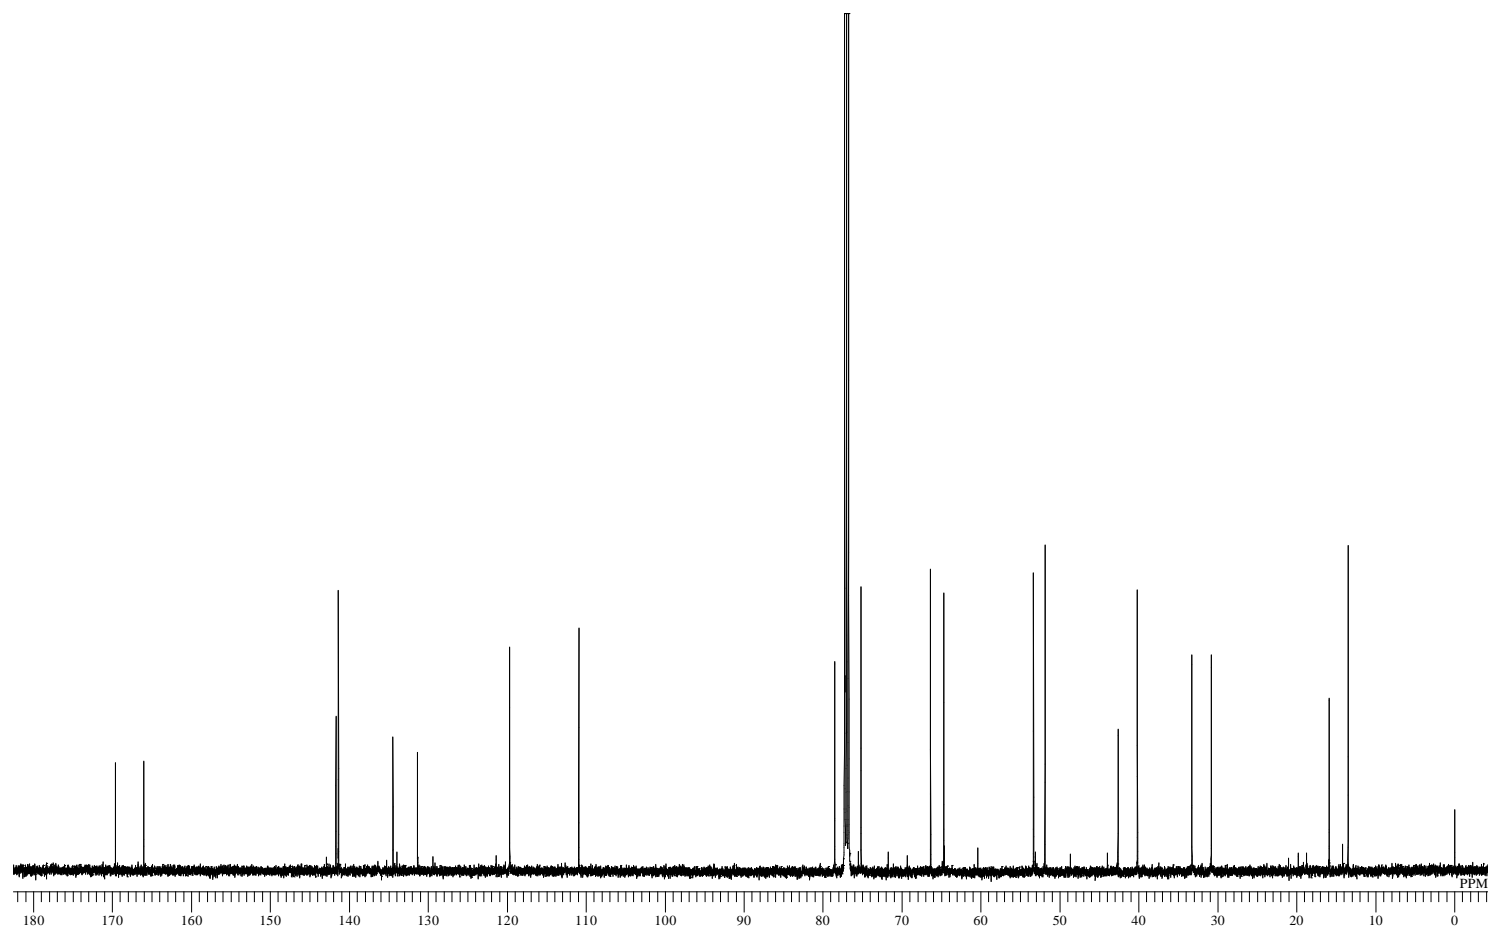

**Figure S45.**  $^1\text{H}$ - $^1\text{H}$  COSY spectrum of **45** (measured in  $\text{CDCl}_3$ , 500 MHz).

HYM-2015-71-8-4-1-4.6mg-COSY\_cdc13

exp4 gCOSY

| SAMPLE         |             | FLAGS         |          |
|----------------|-------------|---------------|----------|
| Date           | Jun 15 2018 | ba            | nb       |
| solvent        | cdc13       | aspul         | y        |
| sample         | huglv1      | 6180          |          |
| ACQUISITION    |             | SPECIAL       |          |
| sw             | 4058.4      | temp          | 24.0     |
| at             | 0.150       | gain          | 40       |
| sp             | 1218        | spin          | 0        |
| rb             | 4000        | F2 PROCESSING |          |
| ss             | 32          | sb            | -0.075   |
| dl             | 1.000       | sbs           | not used |
| nt             | 8           | fn            | 2048     |
| 2D ACQUISITION |             | F1 PROCESSING |          |
| sw1            | 4058.4      | sb1           | -0.032   |
| ni             | 128         | sbs1          | not used |
| d2             | 0           | proci         | lp       |
| DESSATURATION  |             | F1            |          |
| satmode        | n           | tn1           | 2048     |
| TRANSMITTER    |             | DISPLAY       |          |
| wet            | n           | sp            | 305.6    |
| tn             | H1          | vp1           | 3024.0   |
| sfrq           | 500.477     | vp1           | 254.0    |
| torf           | -677.8      | rf1           | 3198.4   |
| tpwr           | 59          | rfp           | 201.7    |
| pw             | 7.400       | rf11          | 201.7    |
| GRADIENTS      |             | rfp1          |          |
| gslvr          | 5154        | rfp1          | 0        |
| gtR            | 0.001000    | wo            | 206.0    |
| EDratio        | 1.000       | ec            | 0        |
| gstab          | 0.000500    | ec2           | 206.0    |
| DECOUPLER      |             | ec2           |          |
| dn             | Cl3         | vs            | 251      |
| dm             | mn          | th            | 5        |
|                | al          | cdc           | av       |

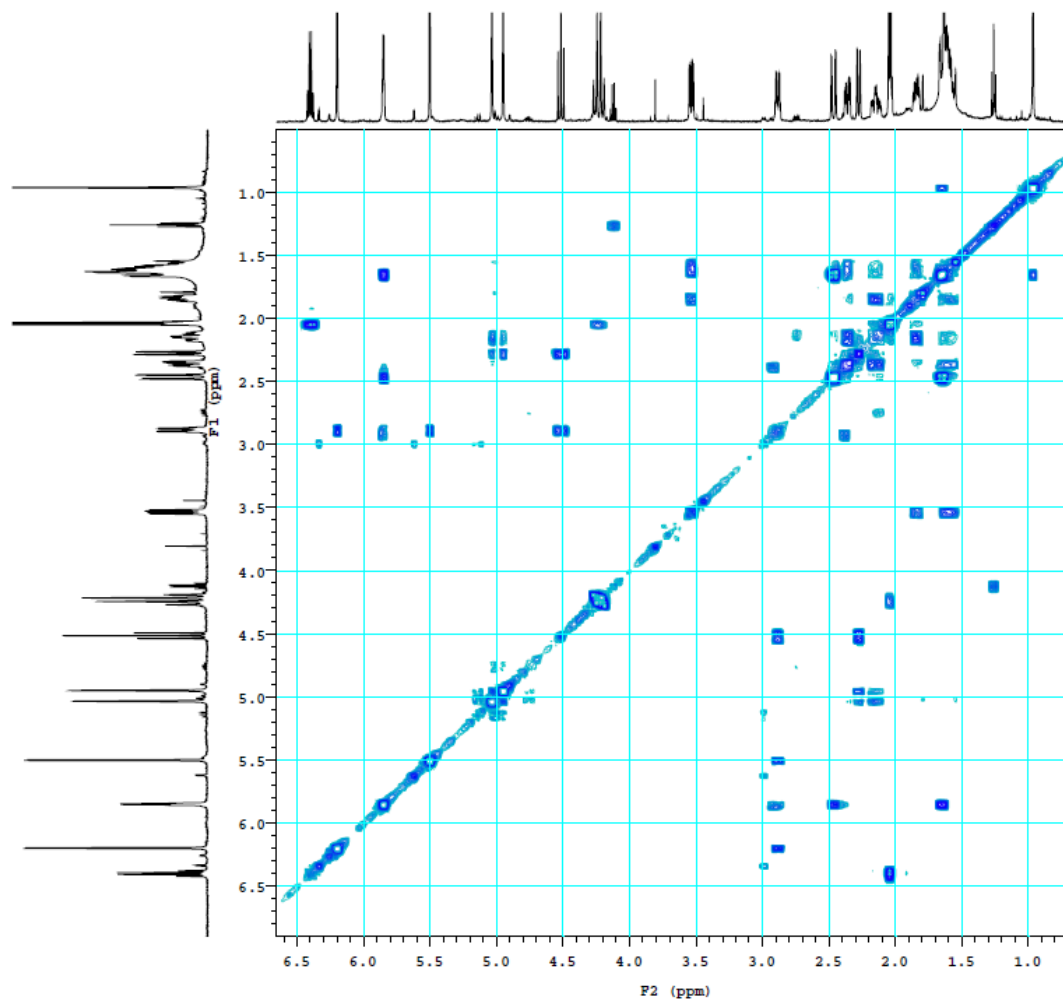

**Figure S46.** HSQC spectrum of **45** (measured in CDCl<sub>3</sub>, 500 MHz).

HYM-2015-71-8-4-1-4.6mg-HSQC\_cdc13

exp5 HSQCAD

| SAMPLE              |             | FLAGS         | ACQUISITION ARRAYS |          |
|---------------------|-------------|---------------|--------------------|----------|
| date                | Jun 15 2018 | hs            | nn                 | array    |
| solvent             | cdc13       | sspul         | y                  | arraydim |
| sample              | PPGrlg      | PPGrlg        | y                  | phase    |
| ACQUISITION         | haglvi      | 6180          | 1                  | phase    |
| sw                  | 4058.4      | SPECIAL       | 24.0               | 1        |
| st                  | 0.150       | temp          | 40                 | 2        |
| up                  | 1218        | gain          | 0                  |          |
| rb                  | 4000        | spin          |                    |          |
| ss                  | 32          | F2 PROCESSING |                    |          |
| dl                  | 1.000       | gf            | 0.069              |          |
| st                  | 8           | gfs           | not used           |          |
| 2D ACQUISITION      | tn          | 2048          |                    |          |
| swi                 | 21390.4     | F1 PROCESSING |                    |          |
| ni                  | 128         | gf1           | 0.006              |          |
| phase               | arrayed     | gf1           | not used           |          |
| PRESSATURATION      | proci       | lp            |                    |          |
| satmode             | n           | fnl           | 2048               |          |
| wet                 | n           | DISPLAY       |                    |          |
| TRANSMITTER         | sp          | 384.8         |                    |          |
| tn                  | EL          | wp            | 2905.1             |          |
| sfrq                | 500.477     | sp1           | 352.9              |          |
| tof                 | -677.8      | wp1           | 18841.9            |          |
| tpwr                | 59          | rf1           | 201.7              |          |
| pw                  | 7.400       | rfp           | 0                  |          |
| DRYCOUPLER          | rf1l        | 1255.6        |                    |          |
| dn                  | Cl3         | rfpl          | 0                  |          |
| dof                 | -2487.0     | PLOT          |                    |          |
| dm                  | nmv         | wc            | 206.0              |          |
| decouwave W40_BCN5m | sc          | 0             |                    |          |
| dmf                 | 32258       | wc2           | 206.0              |          |
| dpwr                | 38          | sc2           | 0                  |          |
| pwzlv1              | 56          | va            | 251                |          |
| pwz                 | 11.000      | th            | 2                  |          |
| j1xh                | 146.0       | ai            | cdc                | pu       |
| multifig            | y           |               |                    |          |
| mult                | 2           |               |                    |          |
| ADIABATIC           |             |               |                    |          |
| pwz180ad            | ONE         | ad300         |                    |          |
| pwz180adr           | ONE         | ad30-         |                    |          |
| OR                  |             |               |                    |          |
| pwz180              | 465.4       |               |                    |          |
| pwzlv1180           | 51          |               |                    |          |
| pwz180ref           | ONE         | ref2-         |                    |          |
| OR                  |             |               |                    |          |
| pwz180r             | 2000.2      |               |                    |          |
| pwzlv1180r          | 43          |               |                    |          |

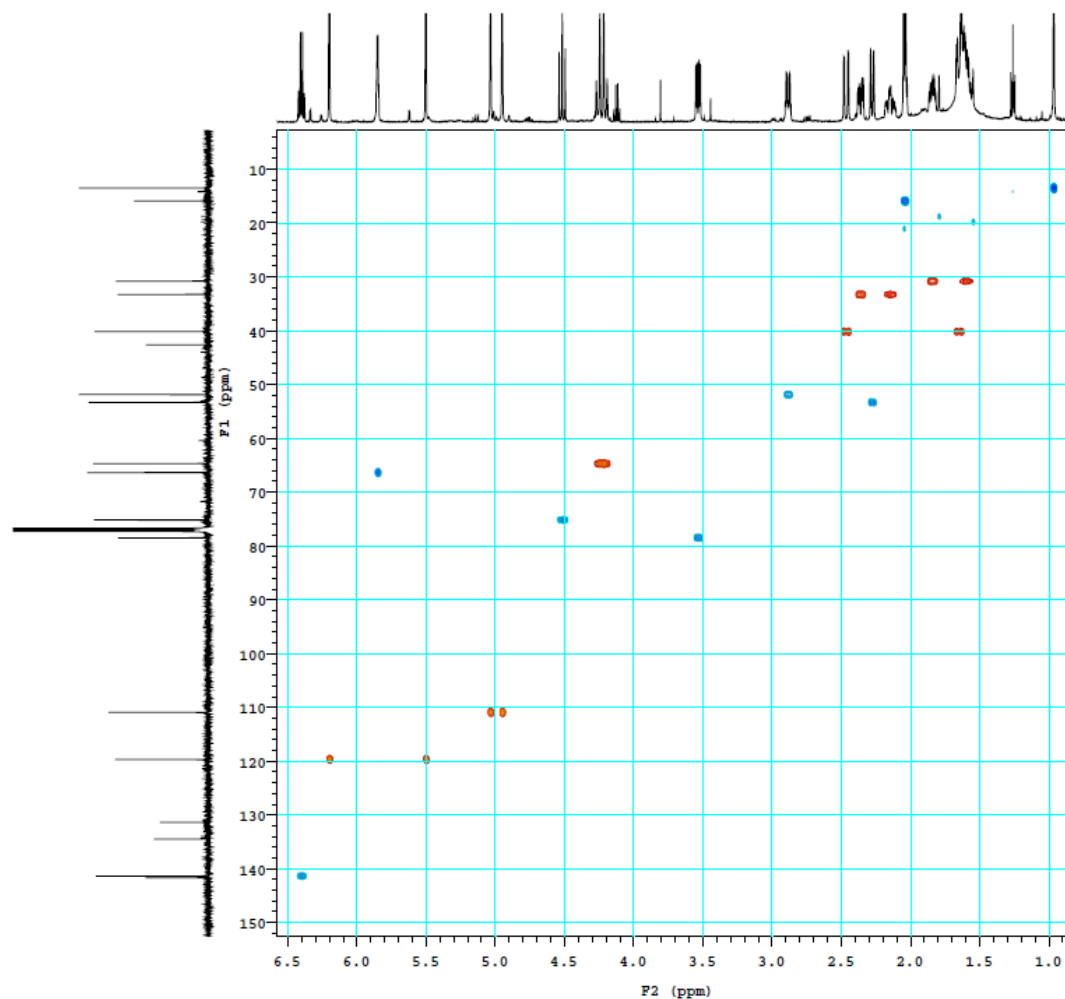

**Figure S47.** HMBC spectrum of **45** (measured in CDCl<sub>3</sub>, 500 MHz).

HYM-2015-71-8-4-1-4.6mg-HMBC\_cdc13

exp6 gEMBCAD

| SAMPLE         |             | FLAGS         | ACQUISITION ARRAYS |          |
|----------------|-------------|---------------|--------------------|----------|
| date           | Jun 15 2018 | ns            | nn                 | array    |
| solvent        | cdcl3       | sspl          | y                  | arraydim |
| sample         |             | PPGrlg        | y                  | 256      |
| ACQUISITION    |             | haglvi        | 6180               | 1        |
| sw             | 4058.4      | SPECIAL       | 1                  | 1        |
| at             | 0.150       | tamp          | 24.0               | 2        |
| sp             | 1218        | gain          | 40                 |          |
| fd             | 4000        | spin          | 0                  |          |
| ss             | 32          | GRADIENTS     |                    |          |
| d1             | 1.000       | gslvli        | 409                |          |
| nt             | 16          | gtl           | 0.001000           |          |
| 2D ACQUISITION |             | gslvli3       | 1227               |          |
| swi            | 30200.1     | gt3           | 0.001000           |          |
| ni             | 128         | gslab         | 0.000500           |          |
| phase          | arrayed     | F2 PROCESSING |                    |          |
| PRESATURATION  |             | sb            | -0.075             |          |
| satmode        | n           | sbs           | not used           |          |
| wet            | n           | fn            | 2048               |          |
| TRANSMITTER    |             | F1 PROCESSING |                    |          |
| tn             | Bl          | gfl           | 0.004              |          |
| sfrq           | 500.477     | gfl           | not used           |          |
| tot            | -677.8      | procl         | lp                 |          |
| tpwr           | 59          | tnl           | 2048               |          |
| pw             | 7.400       | DISPLAY       |                    |          |
| DECOUPLER      |             | sp            | 345.2              |          |
| dn             | Cl3         | wp            | 2972.5             |          |
| dot            | 1287.0      | spi           | -559.3             |          |
| dn             | nnn         | wpl           | 24508.1            |          |
| decoupler      | W40_BCHNsm  | rfl           | 201.7              |          |
| dnc            | 32258       | rflp          | 0                  |          |
| dpwr           | 38          | rfl1          | 1886.4             |          |
| pwz1v1         | 56          | rflp1         | 0                  |          |
| pwz            | 11.000      | PLOT          |                    |          |
| EMBC           |             | wc            | 206.0              |          |
| j1xh           | 146.0       | sc            | 0                  |          |
| j1xh           | 8.0         | wc2           | 206.0              |          |
| ADIBATIC       |             | sc2           | 0                  |          |
| pwz180ad       | ONR_ad300   | vs            | 251                |          |
| pwz1v180       | 51          | th            | 3                  |          |
| pwz180         | 465.4       | ai            | cdc av             |          |

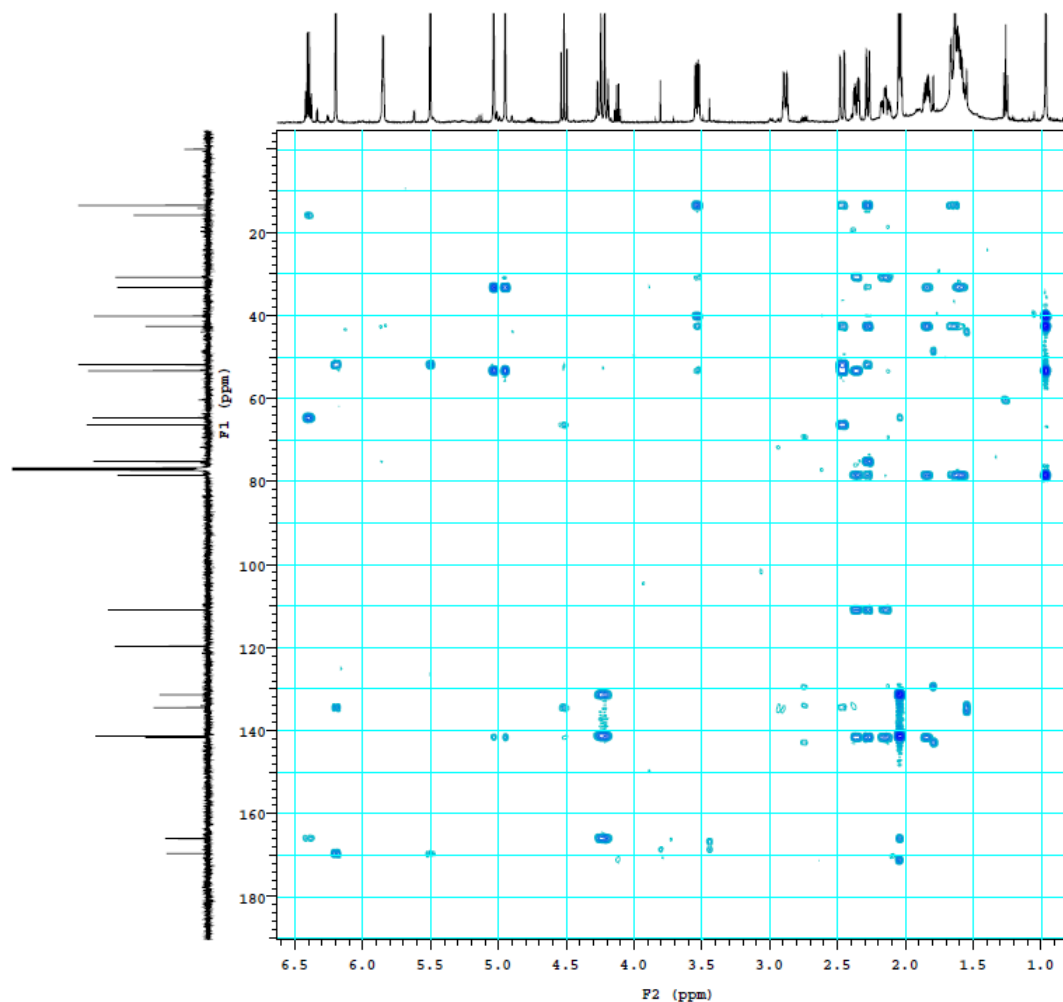

**Figure S48.** NOESY spectrum of **45** (measured in CDCl<sub>3</sub>, 500 MHz).

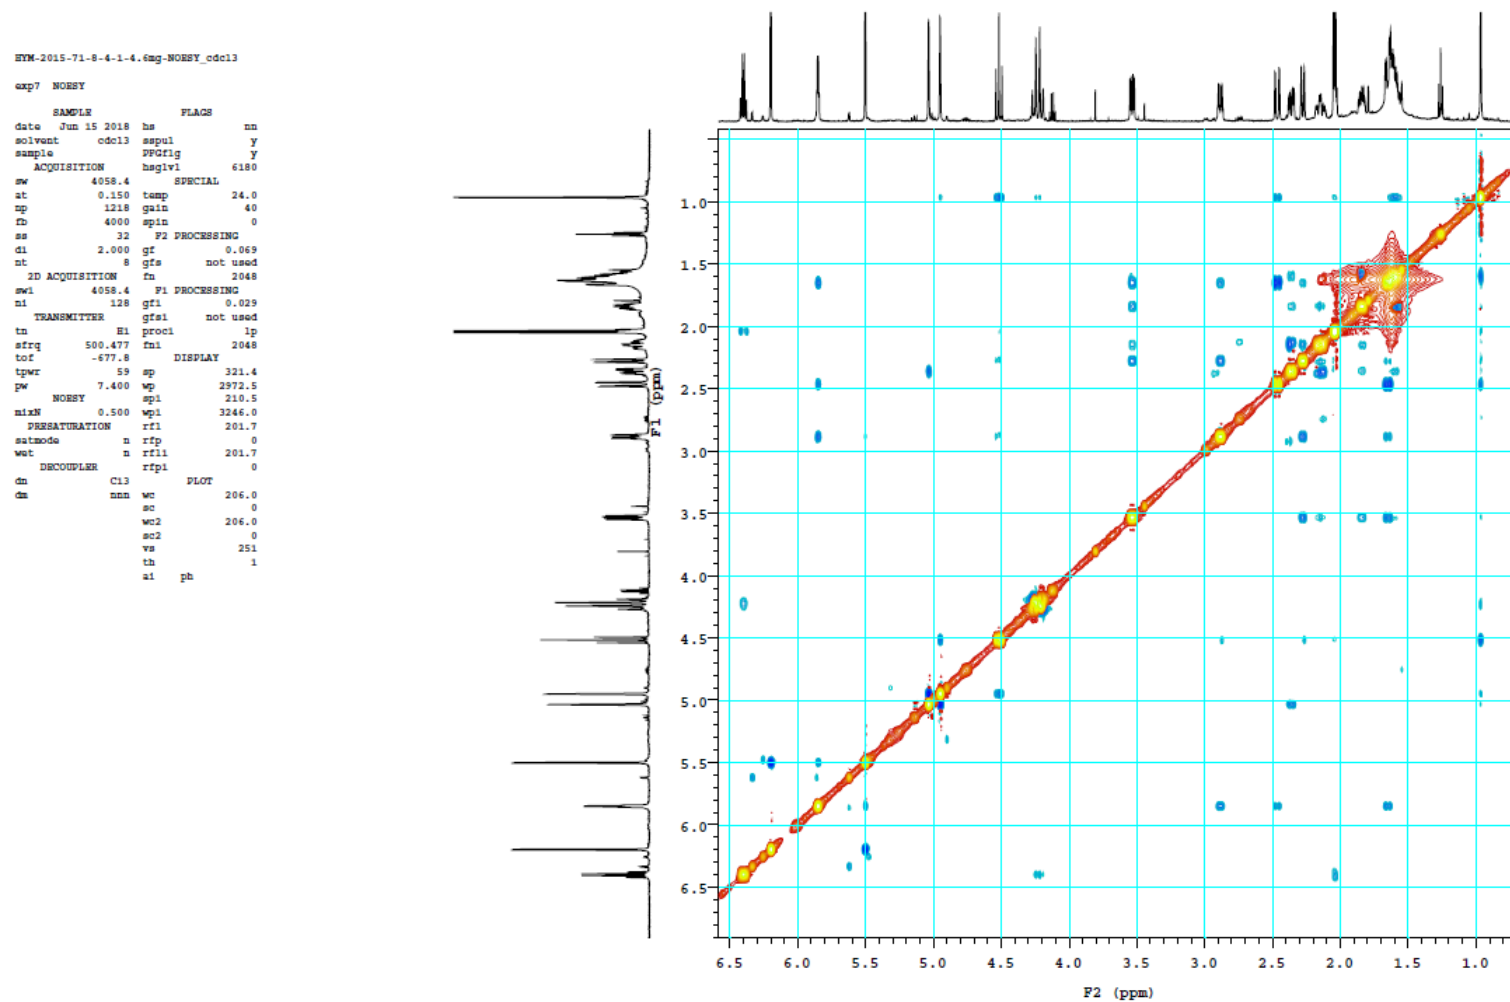



**Figure S49.**  $^1\text{H}$  NMR spectrum of **50** (measured in  $\text{CDCl}_3$ , 500 MHz).

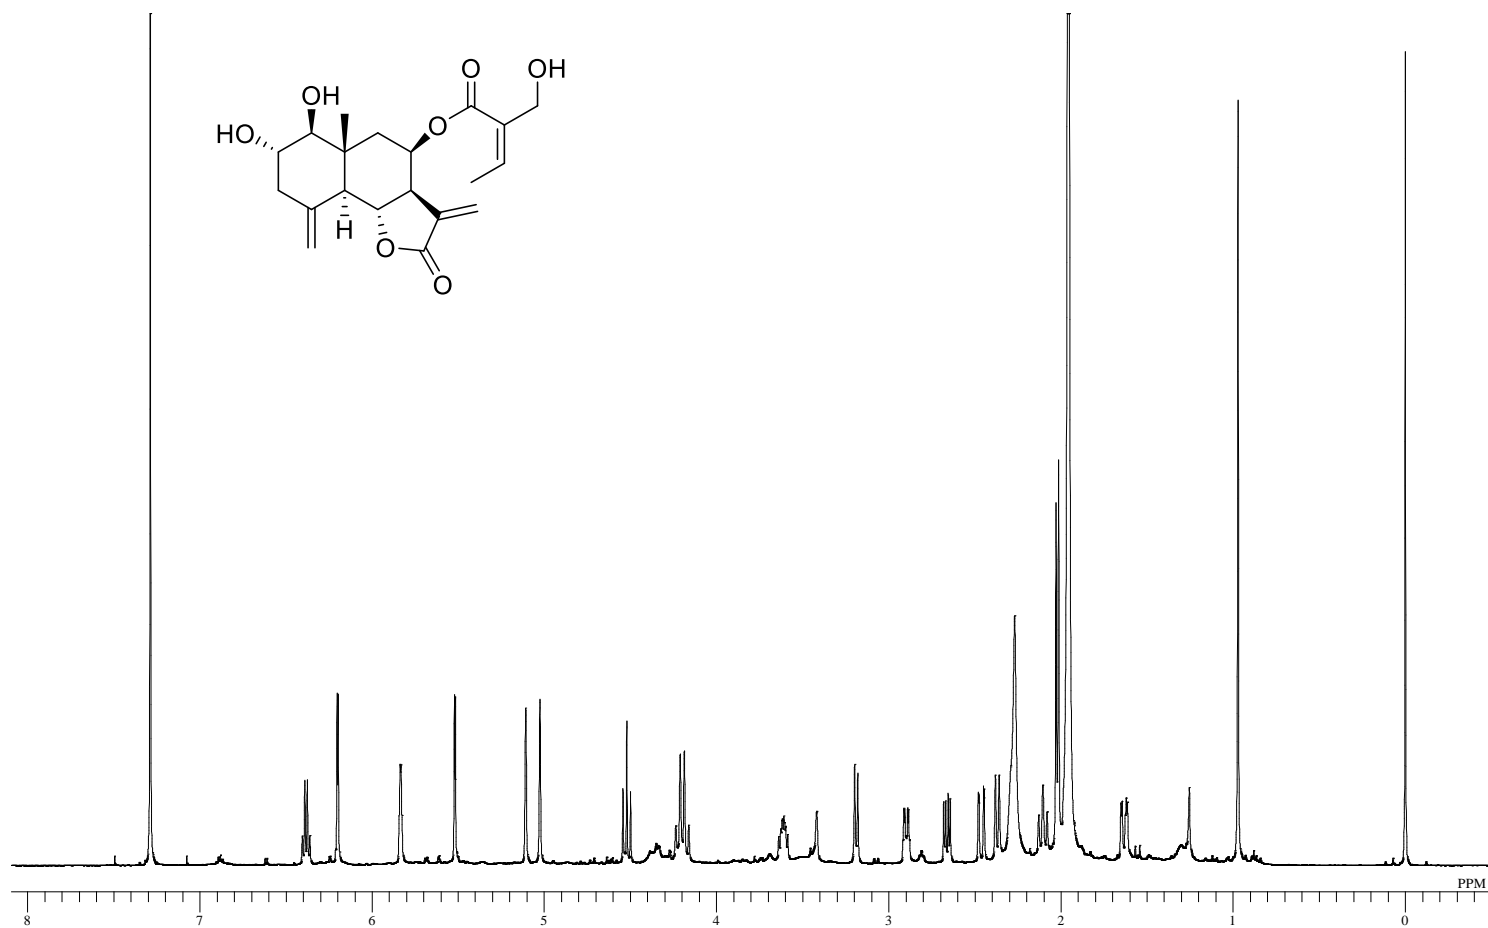

**Figure S50.**  $^{13}\text{C}$  NMR spectrum of **50** (measured in  $\text{CDCl}_3$ , 126 MHz).

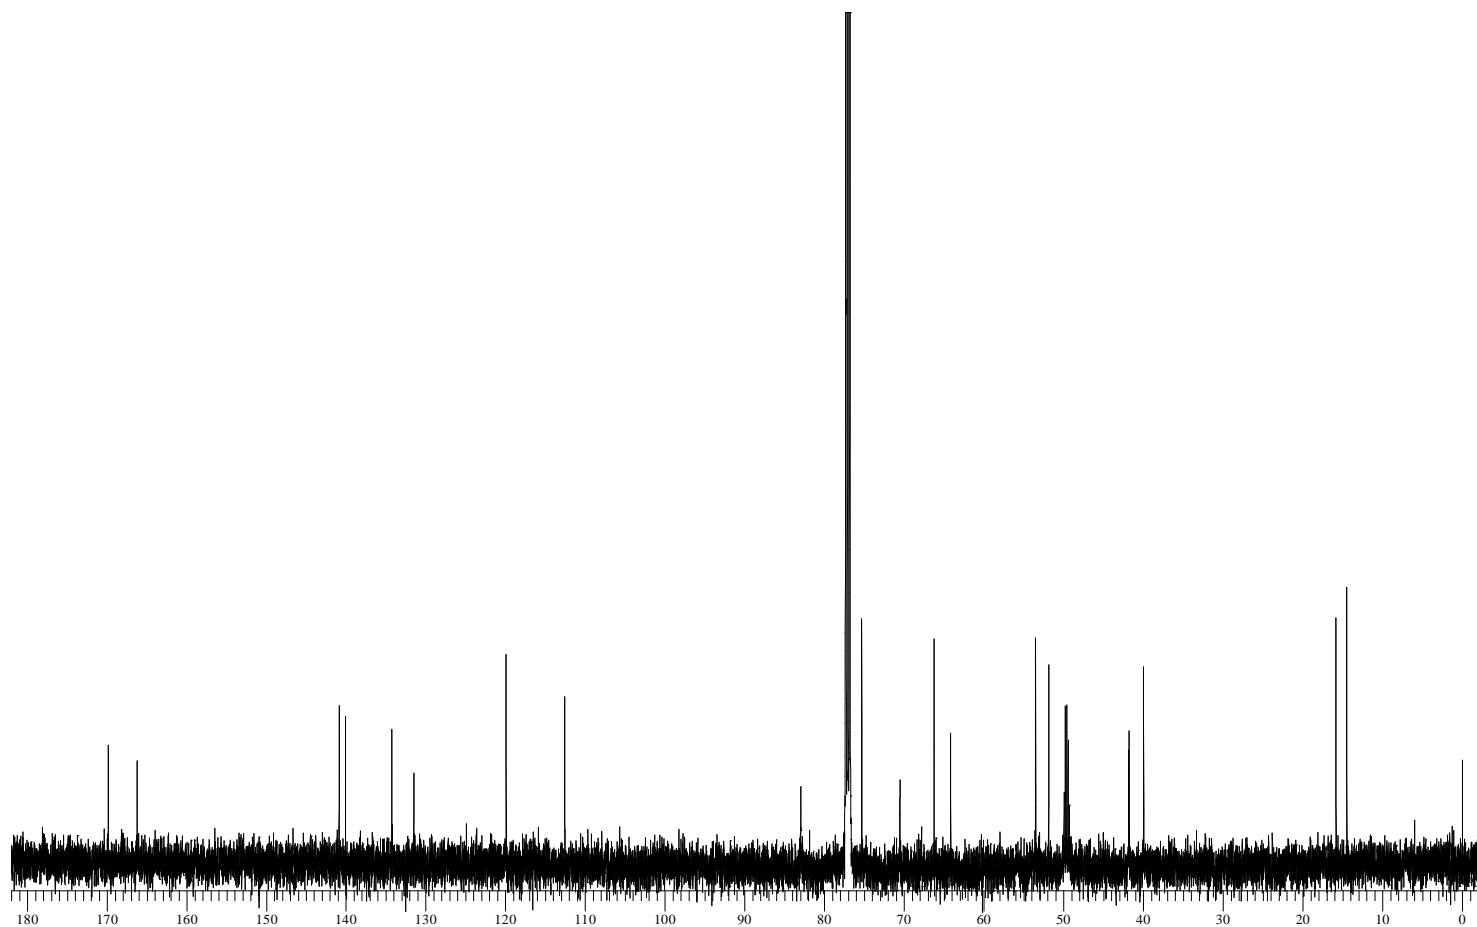

**Figure S51.**  $^1\text{H}$ - $^1\text{H}$  COSY spectrum of **50** (measured in  $\text{CDCl}_3$ , 500 MHz).

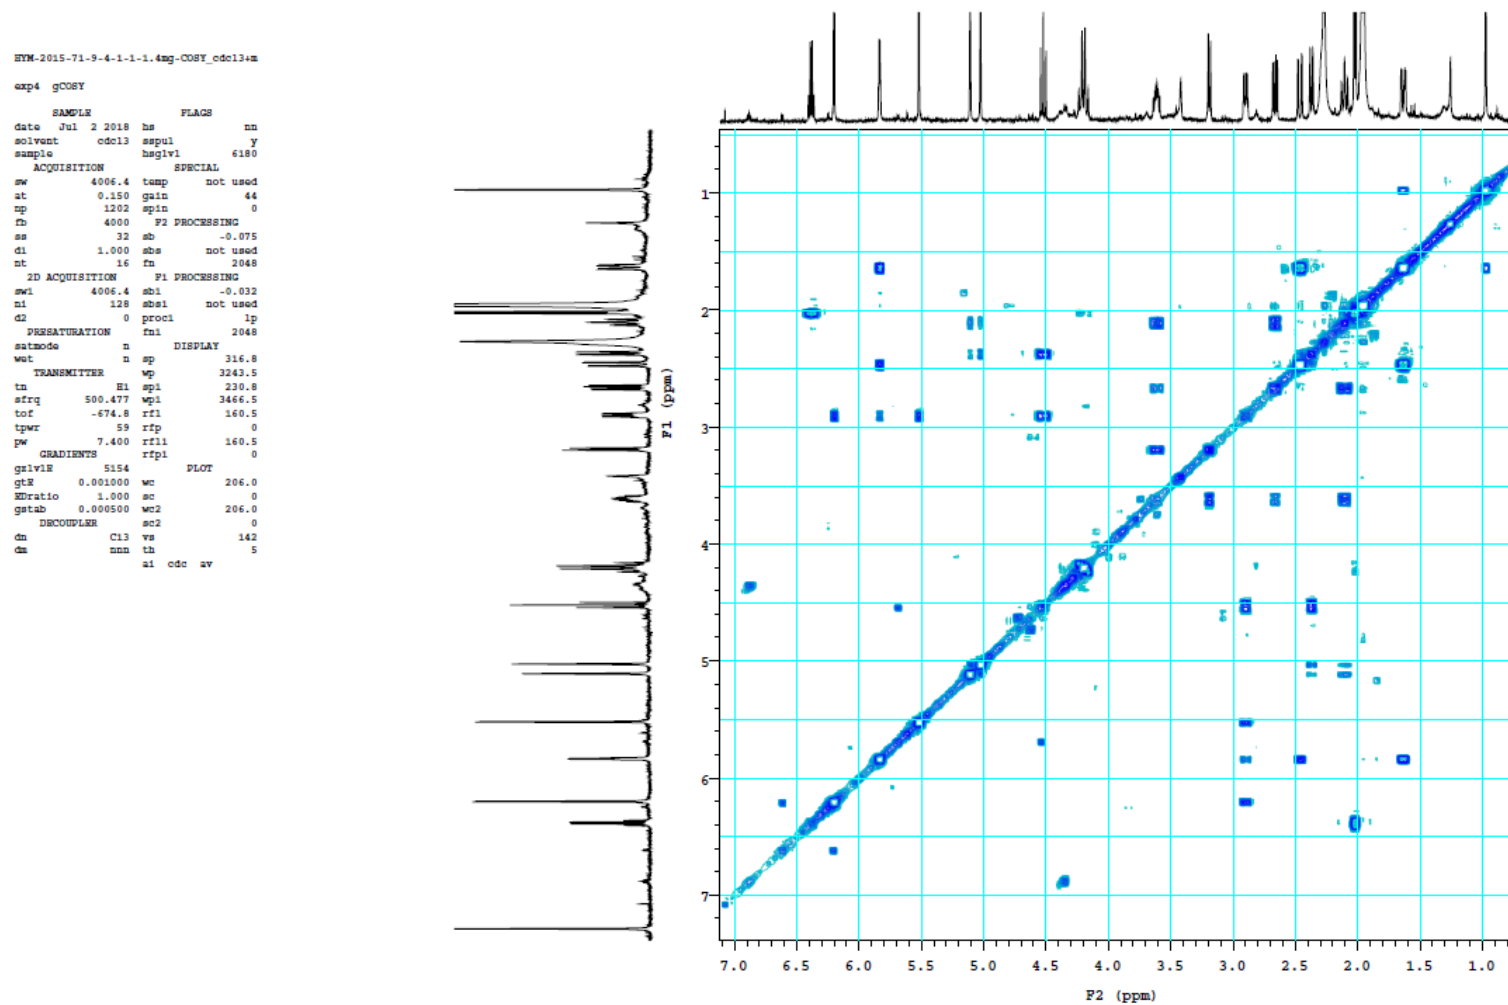

**Figure S52.** HSQC spectrum of **50** (measured in CDCl<sub>3</sub>, 500 MHz).

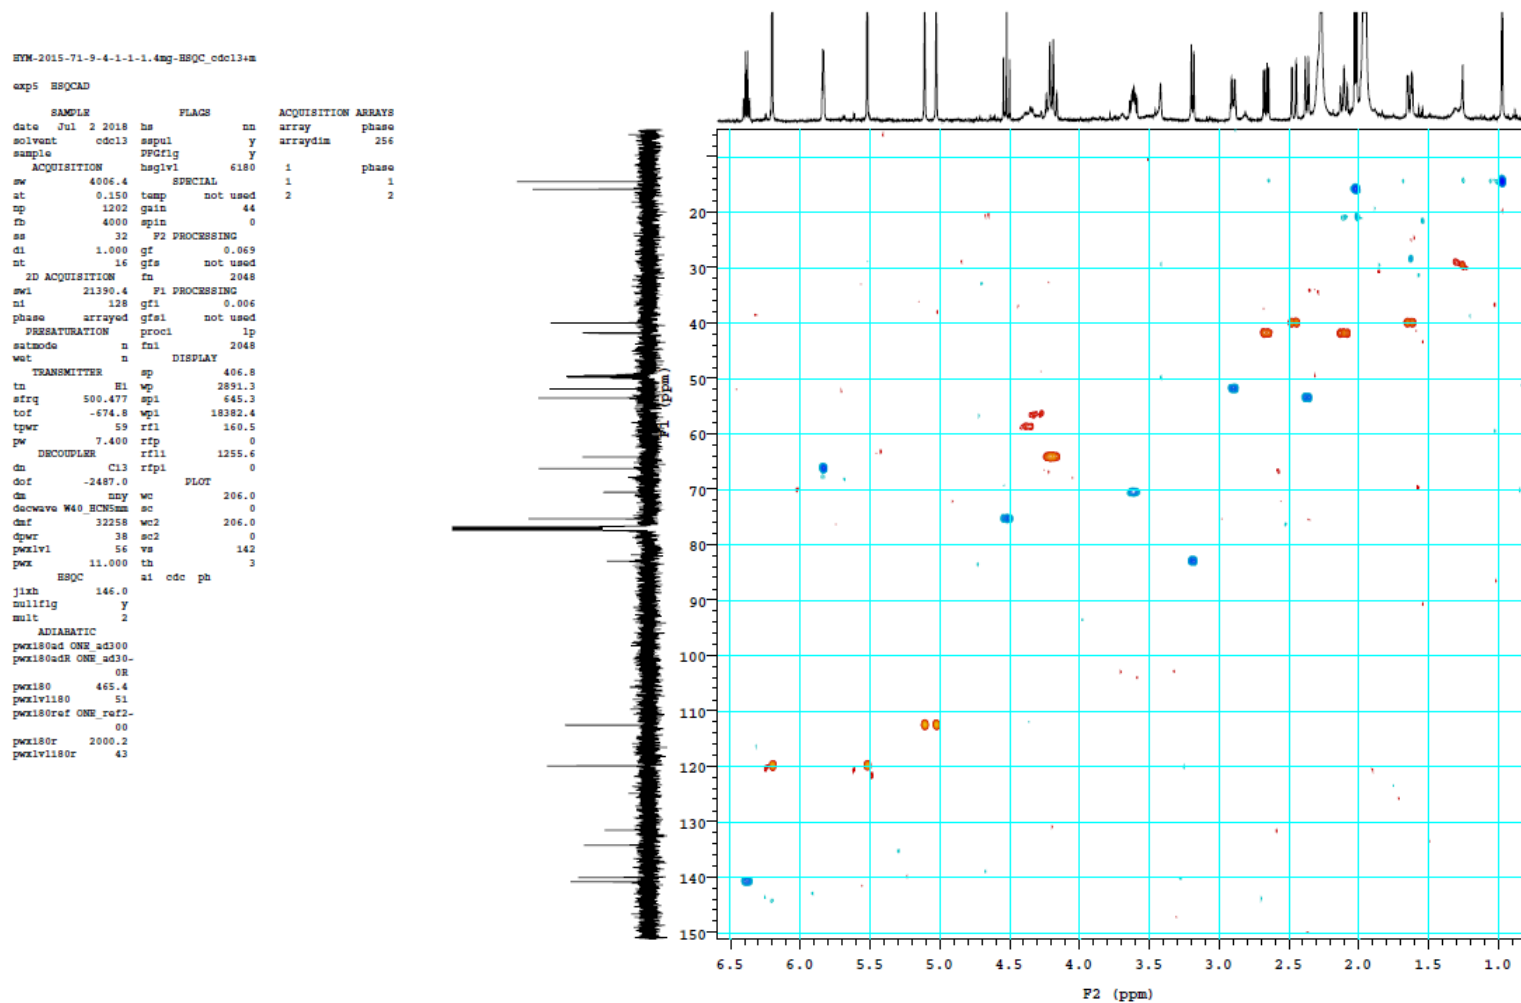

**Figure S53.** HMBC spectrum of **50** (measured in CDCl<sub>3</sub>, 500 MHz).

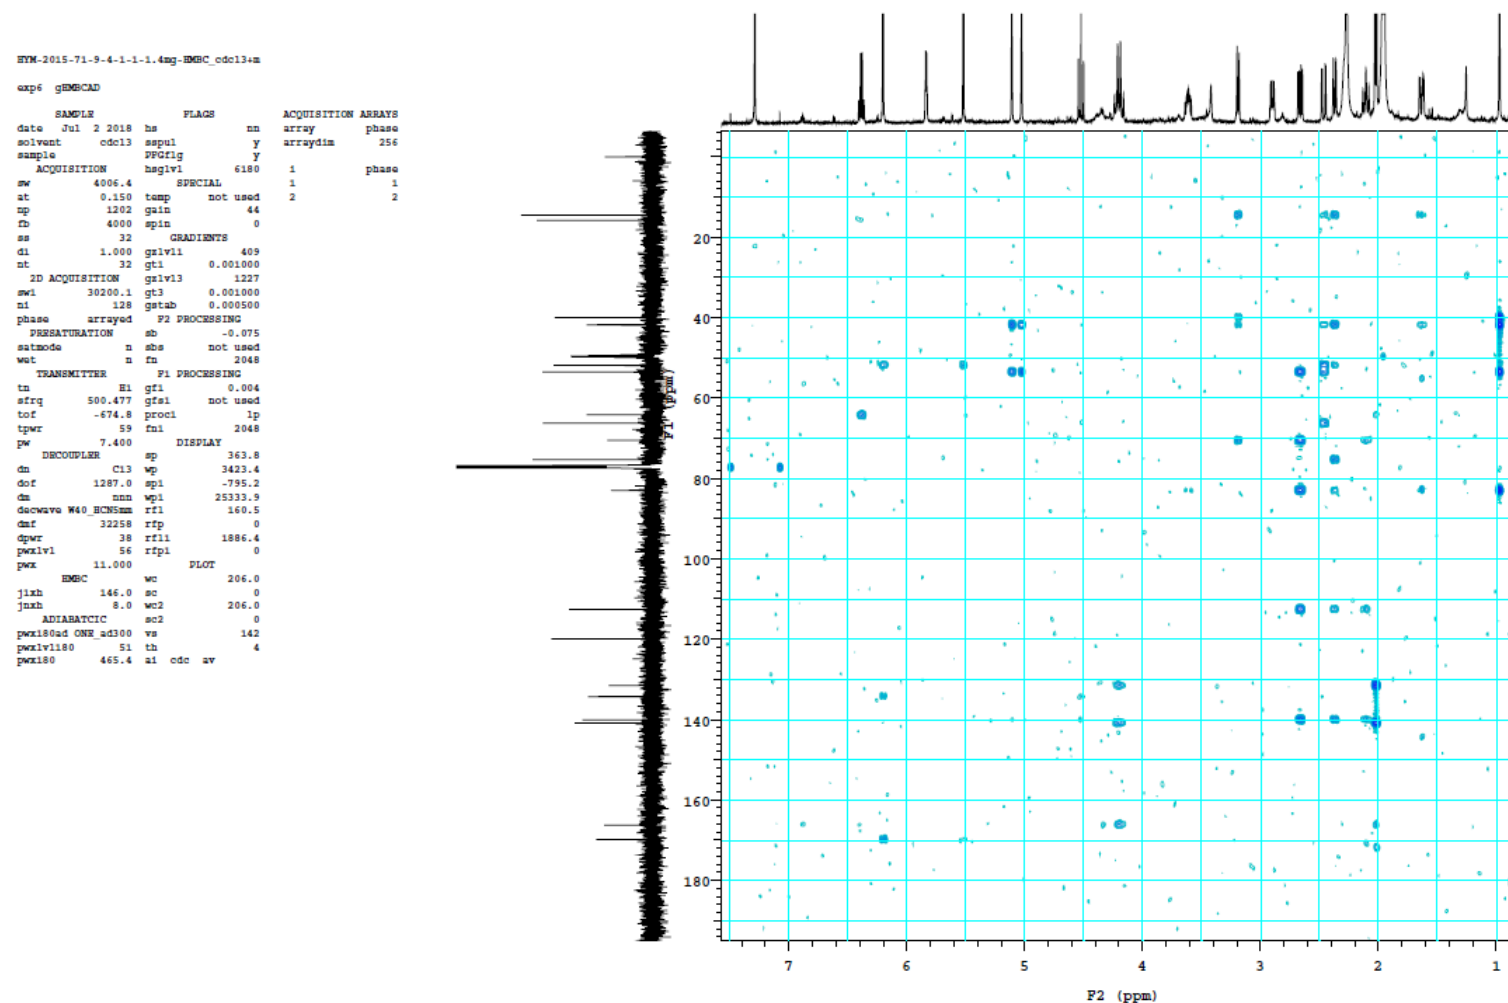

**Figure S54.** NOESY spectrum of **50** (measured in CDCl<sub>3</sub>, 500 MHz).

HYM-2015-71-9-4-1-1-1.4mg-NOESY\_0dc134m

exp7 NOESY

| SAMPLE         |            | FLAGS         |          |
|----------------|------------|---------------|----------|
| date           | Jul 2 2018 | hs            | nn       |
| solvent        | 0dc13      | sspl          | y        |
| sample         | 50         | spflg         | y        |
| ACQUISITION    |            | haglvl        | 6180     |
| sw             | 4006.4     | SPECIAL       |          |
| at             | 0.150      | tamp          | not used |
| tp             | 1202       | gain          | 44       |
| fb             | 4000       | spin          | 0        |
| ss             | 32         | F2 PROCESSING |          |
| d1             | 2.000      | gf            | 0.069    |
| st             | 0          | gfs           | not used |
| 2D ACQUISITION |            | fn            | 2048     |
| sw1            | 4006.4     | F1 PROCESSING |          |
| ni             | 128        | gf1           | 0.029    |
| TRANSMITTER    |            | gfsl          | not used |
| tn             | H1         | procl         | lp       |
| sfsq           | 500.477    | fn1           | 2048     |
| tof            | -674.8     | DISPLAY       |          |
| tpwr           | 59         | sp            | 320.7    |
| pw             | 7.400      | wp            | 3008.7   |
| NOESY          |            | ep1           | 195.5    |
| mixN           | 0.500      | wp1           | 3243.5   |
| PRESATURATION  |            | rf1           | 160.5    |
| satmode        | n          | rfp           | 0        |
| wa5            | n          | rf11          | 160.5    |
| DECOUPLER      |            | rfp1          | 0        |
| dn             | C13        | PLOT          |          |
| ds             | nnn        | wc            | 206.0    |
|                |            | sc            | 0        |
|                |            | wc2           | 206.0    |
|                |            | sc2           | 0        |
|                |            | va            | 142      |
|                |            | th            | 1        |
|                |            | a1            | ph       |

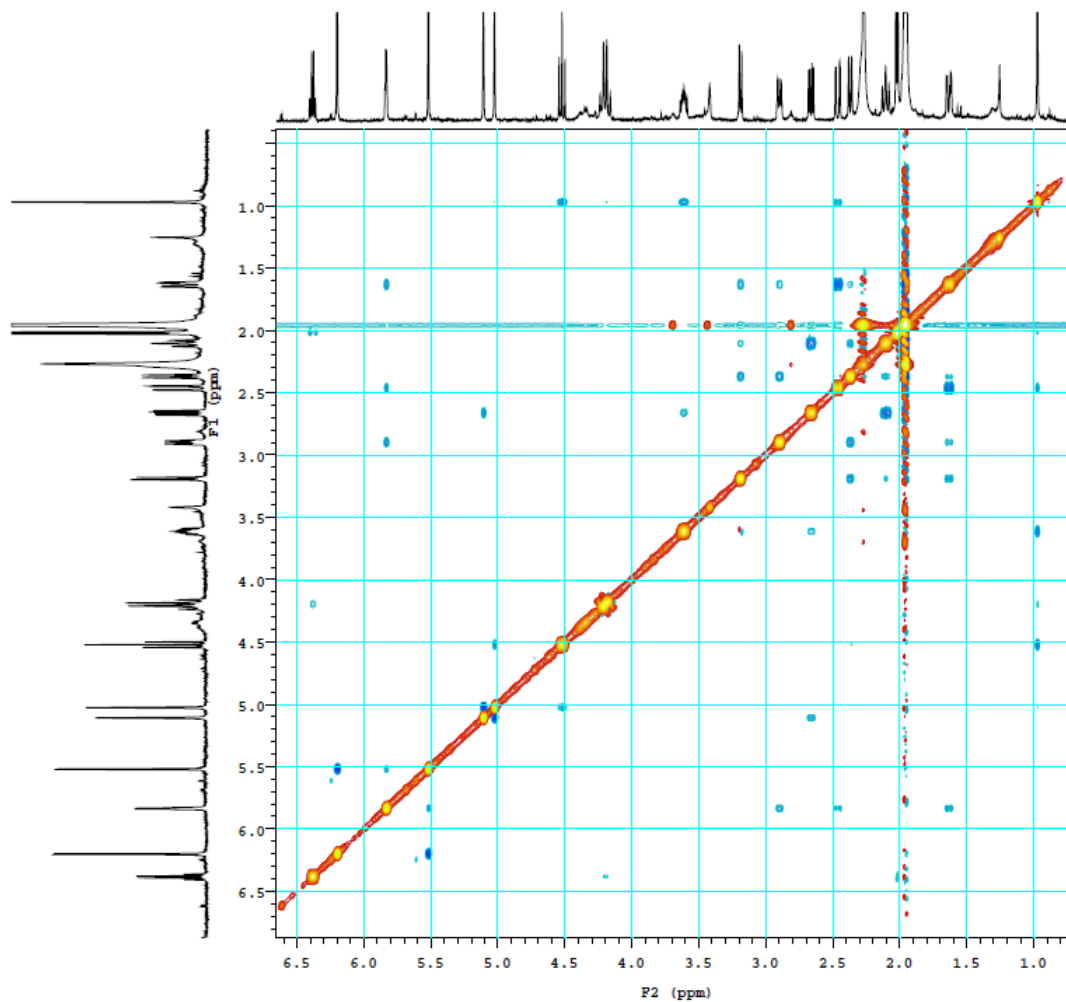

**Figure S55.**  $^1\text{H}$  NMR spectrum of **51** (measured in  $\text{CDCl}_3$ , 500 MHz).

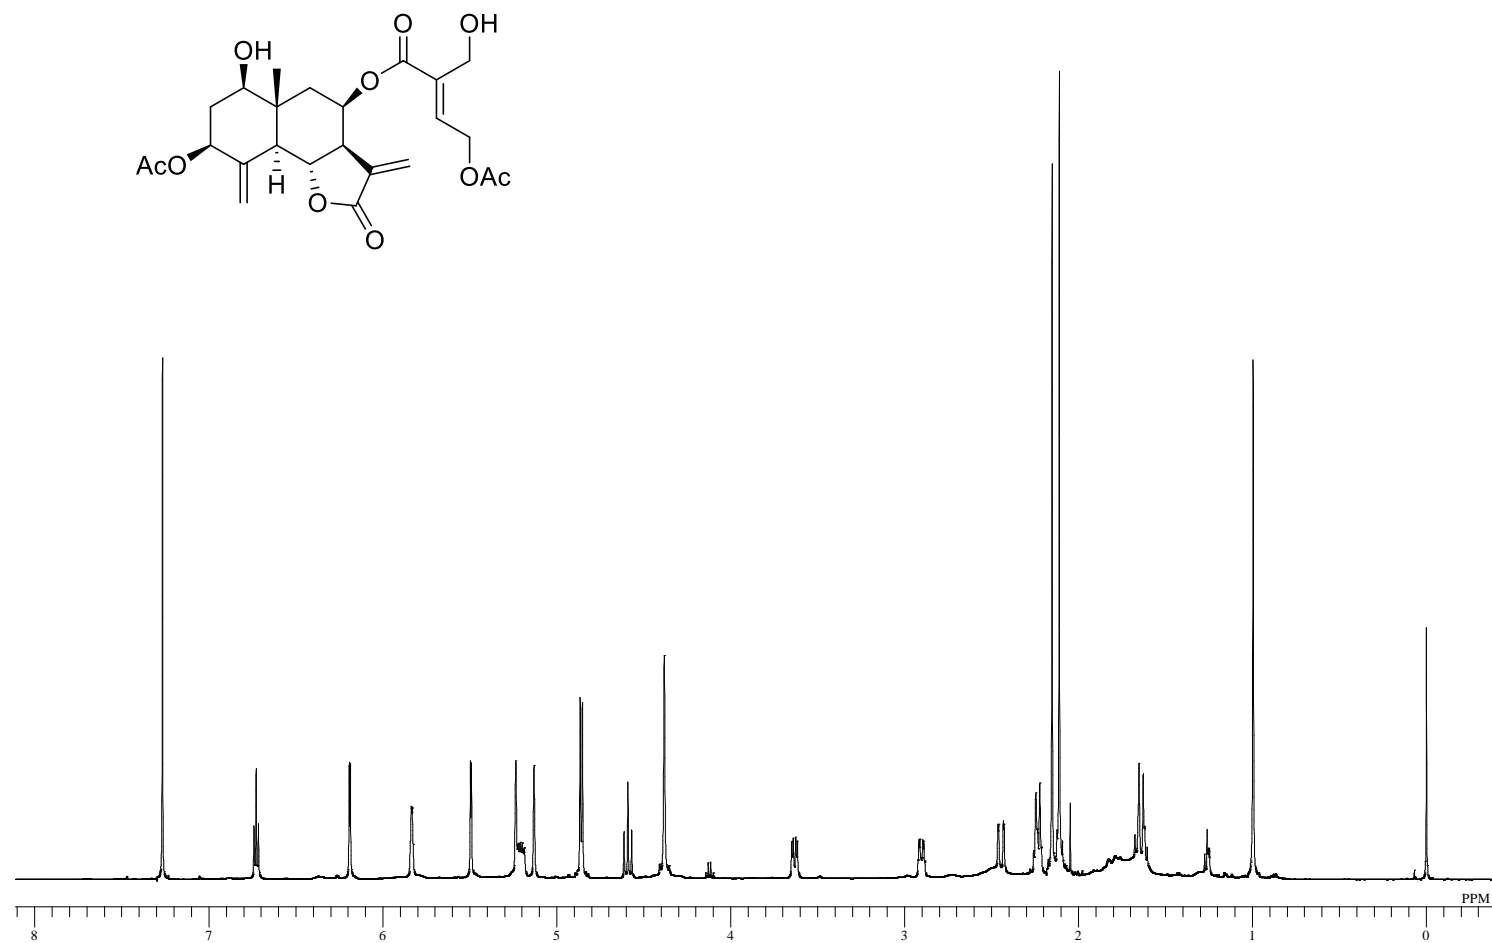

**Figure S56.**  $^{13}\text{C}$  NMR spectrum of **51** (measured in  $\text{CDCl}_3$ , 126 MHz).

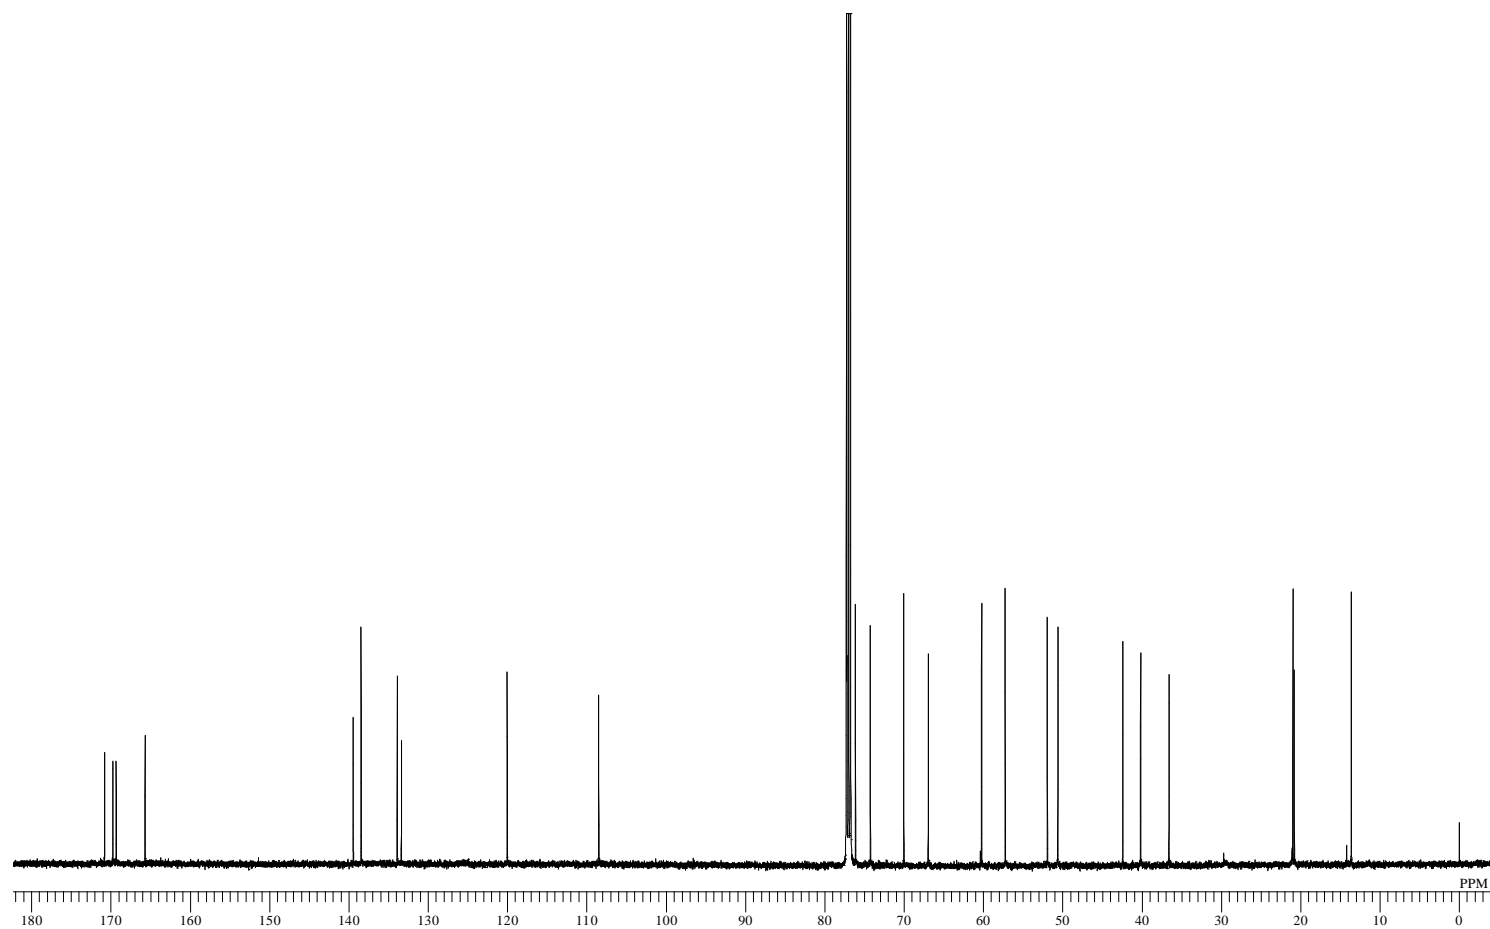



**Figure S57.**  $^1\text{H}$ - $^1\text{H}$  COSY spectrum of **51** (measured in  $\text{CDCl}_3$ , 500 MHz).

HYM-2014-48-L-8-1-1-7.4mg-COSY- $\text{CDCl}_3$

exp4 gCOSY

| SAMPLE         |                 | FLAGS         |          |
|----------------|-----------------|---------------|----------|
| Date           | Apr 1 2021      | hs            | nn       |
| solvent        | $\text{cdcl}_3$ | sspl          | y        |
| sample         | hnglv1          | 6144          |          |
| ACQUISITION    |                 | SPECIAL       |          |
| sw             | 4464.3          | temp          | not used |
| at             | 0.150           | gain          | 28       |
| sp             | 1340            | spin          | 0        |
| fb             | 4000            | F2 PROCESSING |          |
| ss             | 32              | sb            | -0.075   |
| dl             | 1.000           | sbs           | not used |
| nt             | 8               | fn            | 2048     |
| 2D ACQUISITION |                 | F1 PROCESSING |          |
| sw1            | 4464.3          | sb1           | -0.029   |
| n1             | 128             | sbs1          | not used |
| d2             | 0               | procl         | 1p       |
| PRESSATURATION |                 | fml           |          |
| satmode        | n               | DISPLAY       | 2048     |
| wet            | n               | sp            | -25.7    |
| TRANSMITTER    |                 | mp            |          |
| tn             | H1              | sp1           | 3697.0   |
| sfrq           | 500.477         | wp1           | -43.2    |
| tof            | -688.1          | rf1           | 3740.6   |
| tpwr           | 58              | rfp           | 413.7    |
| pw             | 7.800           | rf11          | 0        |
| GRADIENTS      |                 | rfp1          |          |
| gplvr          | 5025            | PLOT          | 0        |
| gtr            | 0.001000        | wc            | 206.0    |
| edratio        | 1.000           | sc            | 0        |
| gstab          | 0.000500        | wc2           | 206.0    |
| DECOUPLER      |                 | sc2           |          |
| dm             | $\text{Cl}_3$   | vs            | 584      |
| dm             | nnn             | th            | 6        |
|                | a1              | cdc           | av       |

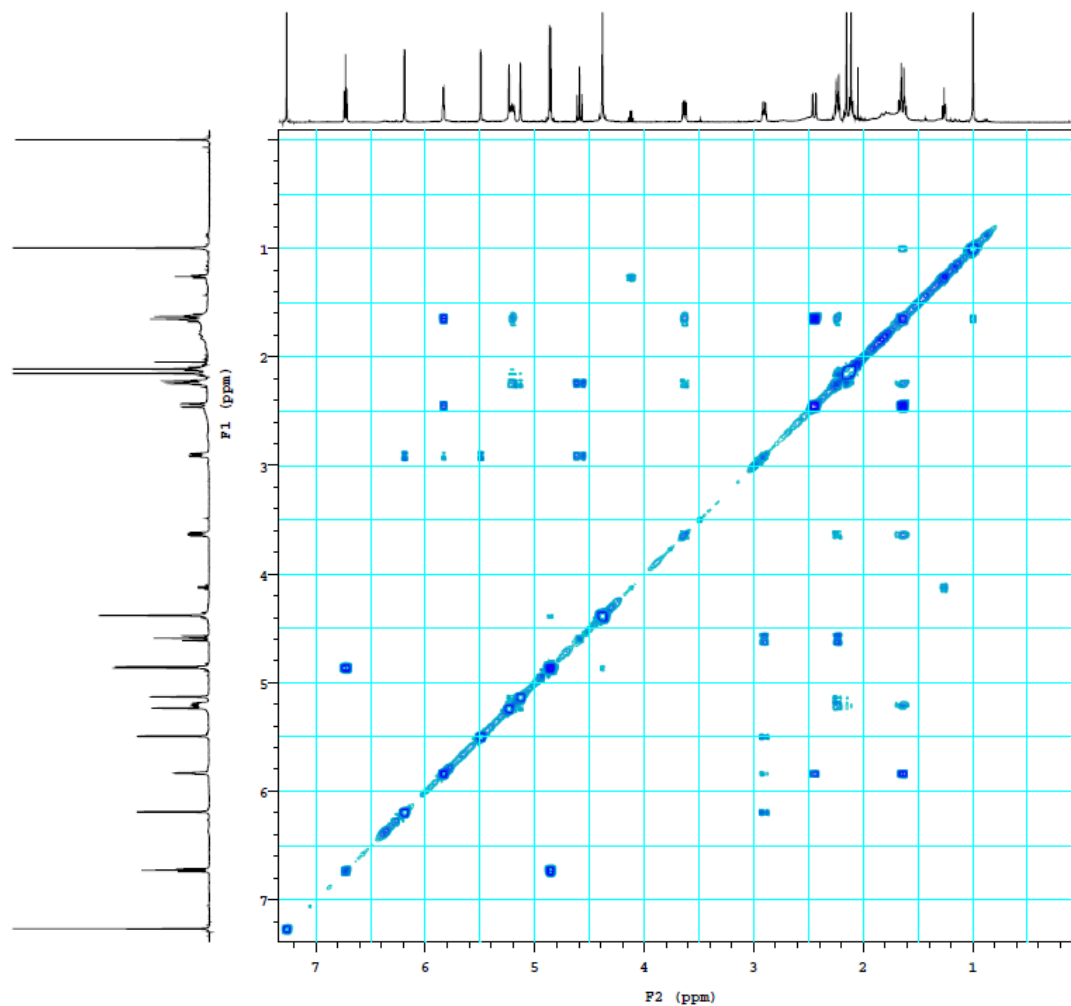

**Figure S58.** HSQC spectrum of **51** (measured in CDCl<sub>3</sub>, 500 MHz).

HYM-2014-48-L-8-1-1-7.4mg-HSQC-CDCl3

exp5 HSQCAD

| SAMPLE         |            | FLAGS         | ACQUISITION ARRAYS |          |
|----------------|------------|---------------|--------------------|----------|
| date           | Apr 1 2021 | hs            | nn                 | phase    |
| solvent        | cdcl3      | aspul         | y                  | arraydim |
| sample         |            | PPGflg        | y                  | 256      |
| ACQUISITION    |            | haglvl        | 6144               | 1        |
| sw             | 4464.3     | SPECIAL       | 1                  | 1        |
| at             | 0.150      | temp          | not used           | 2        |
| sp             | 1340       | gain          | 28                 |          |
| fb             | 4000       | spin          | 0                  |          |
| ss             | 32         | F2 PROCESSING |                    |          |
| dl             | 1.000      | gf            | 0.069              |          |
| nt             | 16         | gfs           | not used           |          |
| 2D ACQUISITION |            | fn            | 2048               |          |
| sw1            | 25165.1    | F1 PROCESSING |                    |          |
| ni             | 128        | gfi           | 0.005              |          |
| phase          | arrayed    | gfsl          | not used           |          |
| PRESSURIZATION |            | procl         | lp                 |          |
| satmode        | n          | fni           | 2048               |          |
| wet            | n          | DISPLAY       |                    |          |
| TRANSMITTER    |            | sp            | -38.8              |          |
| tn             | H1         | wp            | 3705.7             |          |
| effrq          | 500.477    | sp1           | -347.3             |          |
| tof            | -688.1     | wp1           | 19168.8            |          |
| tpwr           | 58         | rfl           | 413.7              |          |
| pw             | 7.800      | rpf           | 0                  |          |
| DECOUPLER      |            | rfl1          | 1256.5             |          |
| dn             | Cl3        | rpf1          | 0                  |          |
| dof            | -600.6     | PLOT          |                    |          |
| dm             | mnv        | wc            | 206.0              |          |
| dacwave        | W40_BCM5m  | sc            | 0                  |          |
| dmf            | 32258      | wd2           | 206.0              |          |
| dpwr           | 38         | sc2           | 0                  |          |
| pw1vl1         | 56         | va            | 584                |          |
| pw1            | 10.500     | th            | 1                  |          |
| HSQC           |            | al            | cdc                | ph       |
| j1sh           | 146.0      |               |                    |          |
| multflg        | y          |               |                    |          |
| mult           | 2          |               |                    |          |
| ADIABATIC      |            |               |                    |          |
| pw180ad        | ONR_ad300  |               |                    |          |
| pw180adr       | ONR_ad30-  |               |                    |          |
|                | OR         |               |                    |          |
| pw180          | 465.4      |               |                    |          |
| pw1vl180       | 51         |               |                    |          |
| pw180ref       | ONR_ref2-  |               |                    |          |
|                | 00         |               |                    |          |
| pw180r         | 2000.2     |               |                    |          |
| pw1vl180r      | 43         |               |                    |          |

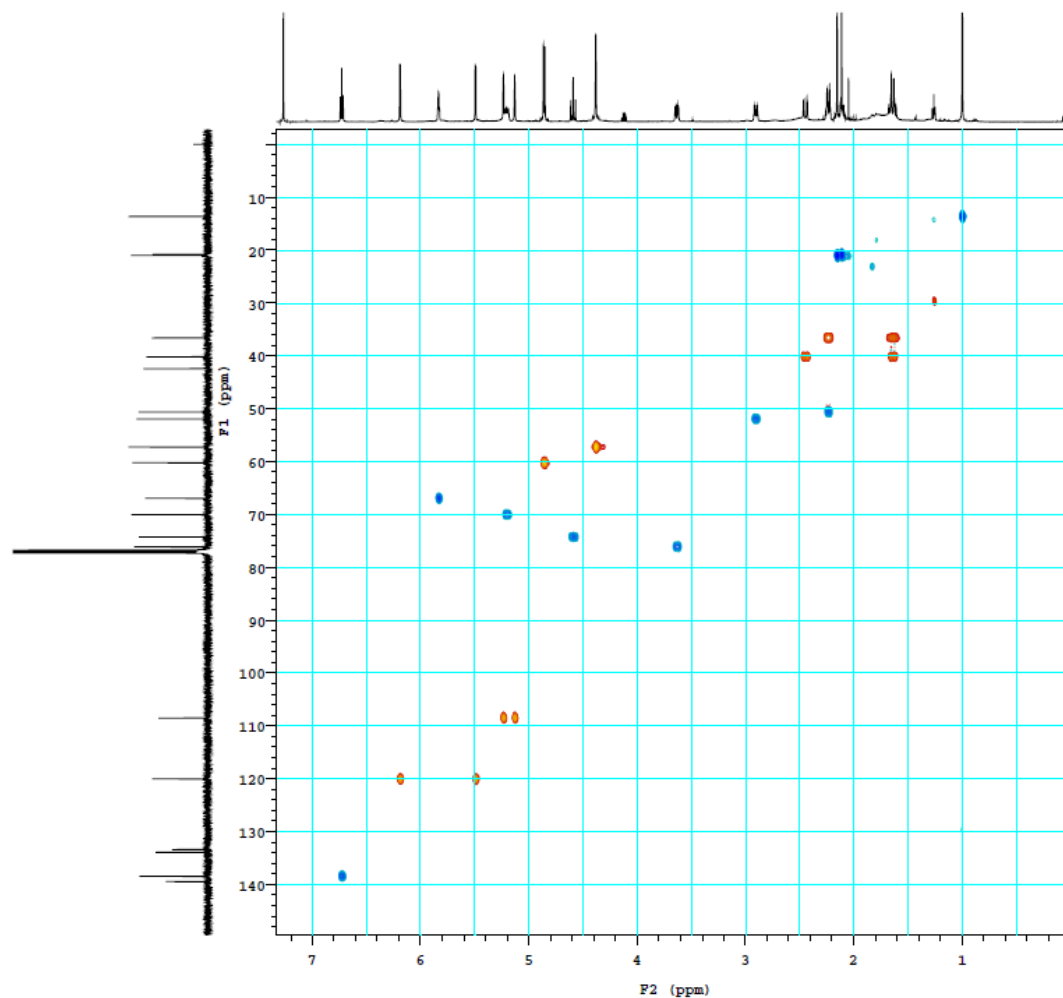

**Figure S59.** HMBC spectrum of **51** (measured in CDCl<sub>3</sub>, 500 MHz).

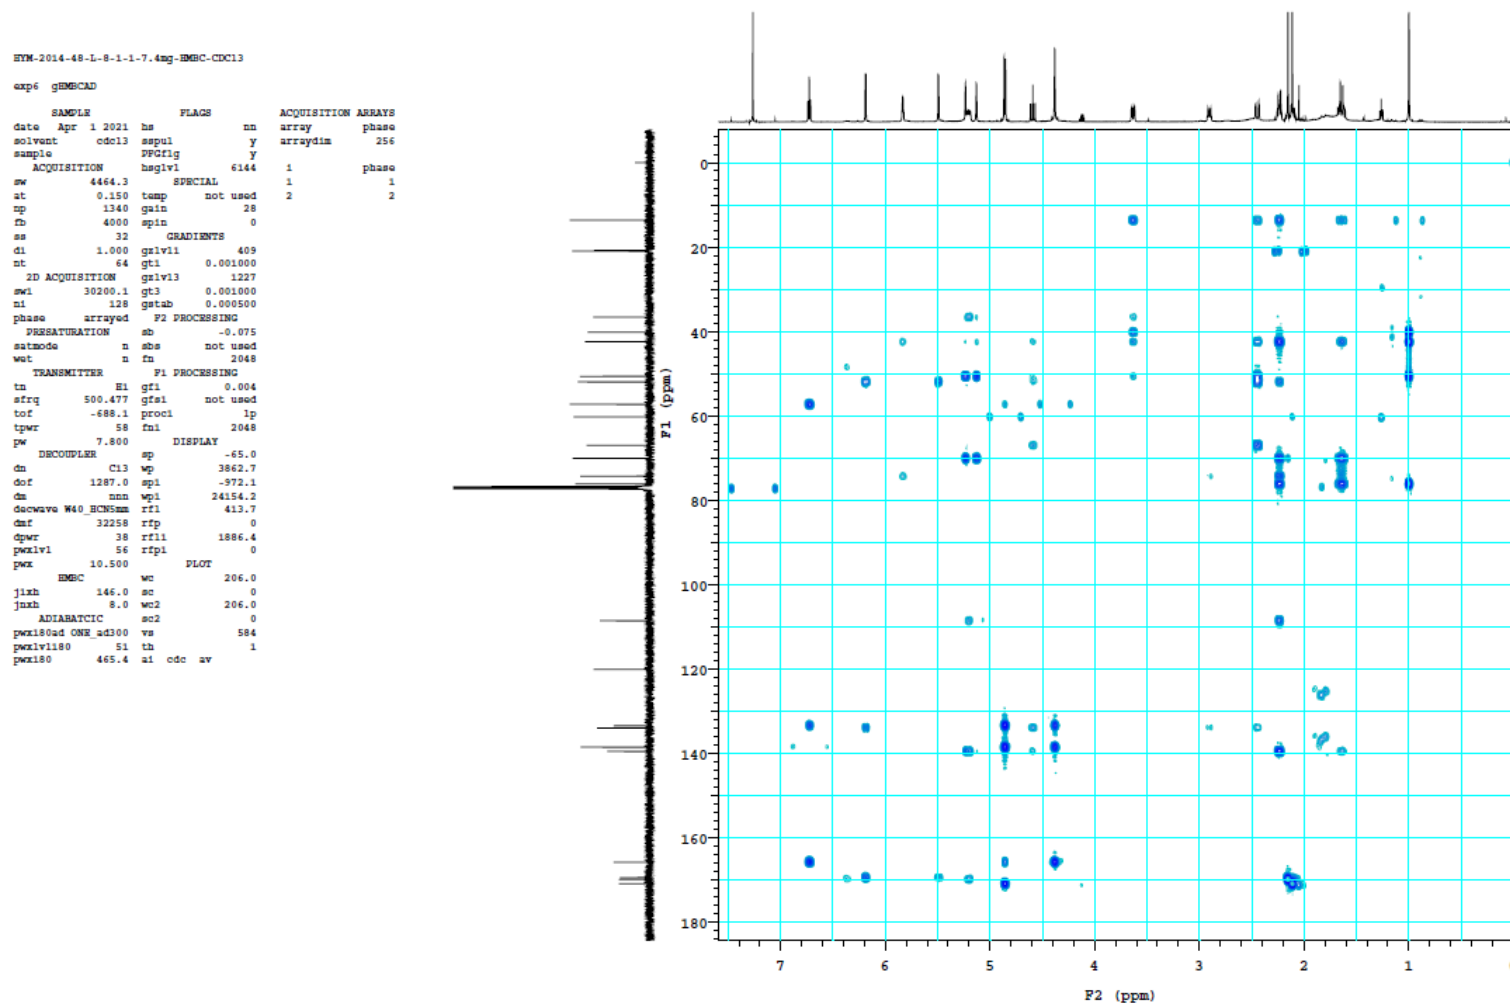

**Figure S60.** NOESY spectrum of **51** (measured in CDCl<sub>3</sub>, 500 MHz).

HYM-2014-48-L-8-1-1-7.4mg-NOESY-CDCl3

exp7 NOESY

| SAMPLE         |            | FLAGS         |    |          |
|----------------|------------|---------------|----|----------|
| date           | Apr 1 2021 | hs            |    | nn       |
| solvent        | cdcl3      | sspul         |    | y        |
| sample         |            | DPGflg        |    | y        |
| ACQUISITION    |            | haglvi        |    | 6144     |
| sw             | 4464.3     | SPECIAL       |    |          |
| at             | 0.150      | temp          |    | not used |
| sp             | 1340       | gain          |    | 28       |
| rb             | 4000       | spin          |    | 0        |
| as             | 32         | F2 PROCESSING |    |          |
| d1             | 2.000      | gf            |    | 0.069    |
| nt             | 16         | gfa           |    | not used |
| 2D ACQUISITION |            | fm            |    | 2048     |
| sw1            | 4464.3     | F1 PROCESSING |    |          |
| m1             | 128        | gfi           |    | 0.026    |
| TRANSMITTER    |            | gfal          |    | not used |
| tn             | E1         | procl         |    | lp       |
| sfrq           | 500.477    | fml           |    | 2048     |
| tof            | -688.1     | DISPLAY       |    |          |
| tpwr           | 58         | sp            |    | -34.4    |
| pw             | 7.800      | wp            |    | 3697.0   |
|                | NOESY      | sp1           |    | -69.3    |
| mixN           | 0.500      | wp1           |    | 3779.8   |
| PRESATURATION  |            | rfl           |    | 413.7    |
| satmode        | n          | rfp           |    | 0        |
| wet            | n          | rfl1          |    | 413.7    |
| DECOUPLER      |            | rflp1         |    | 0        |
| dn             | Cl3        | PLOT          |    |          |
| ds             | nnn        | we            |    | 206.0    |
|                |            | sc            |    | 0        |
|                |            | we2           |    | 206.0    |
|                |            | sc2           |    | 0        |
|                |            | vs            |    | 584      |
|                |            | th            |    | 1        |
|                |            | al            | pb |          |

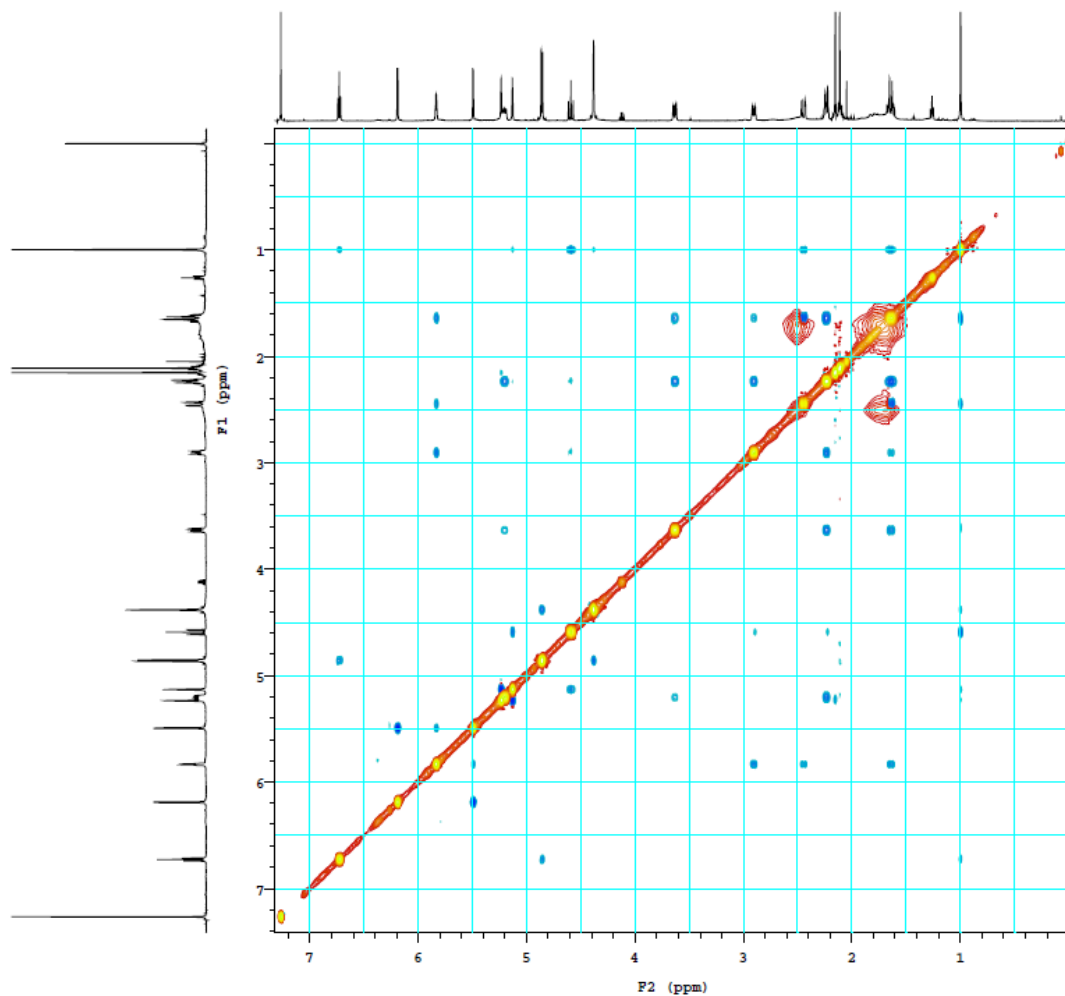

**Figure S61.**  $^1\text{H}$  NMR spectrum of **53** (measured in  $\text{CDCl}_3$ , 500 MHz).

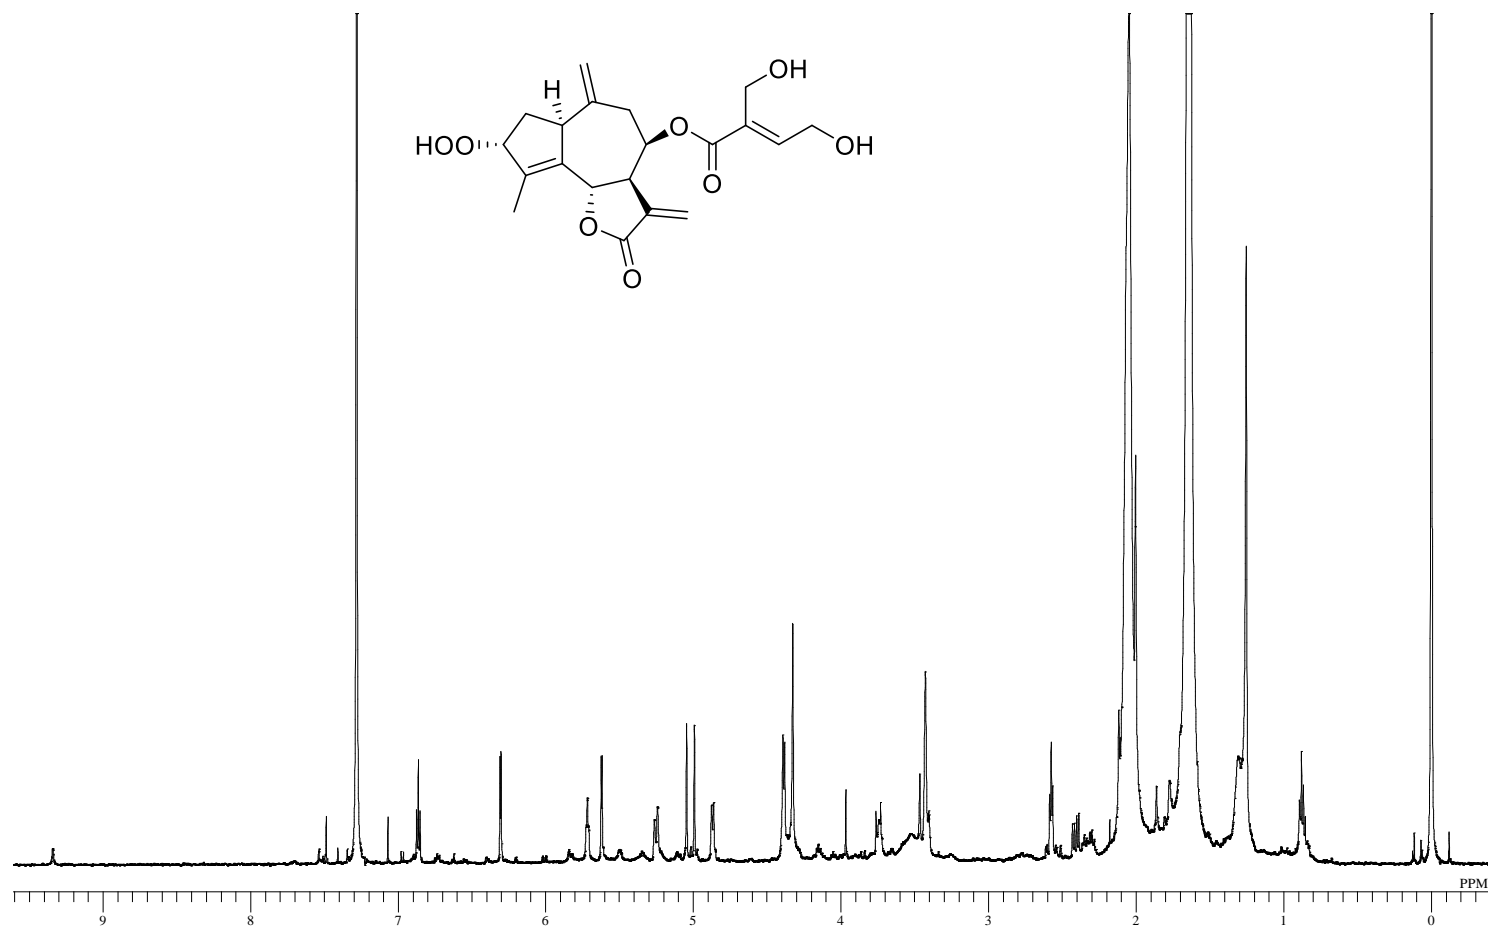

**Figure S62.**  $^{13}\text{C}$  NMR spectrum of **53** (measured in  $\text{CDCl}_3$ , 126 MHz).

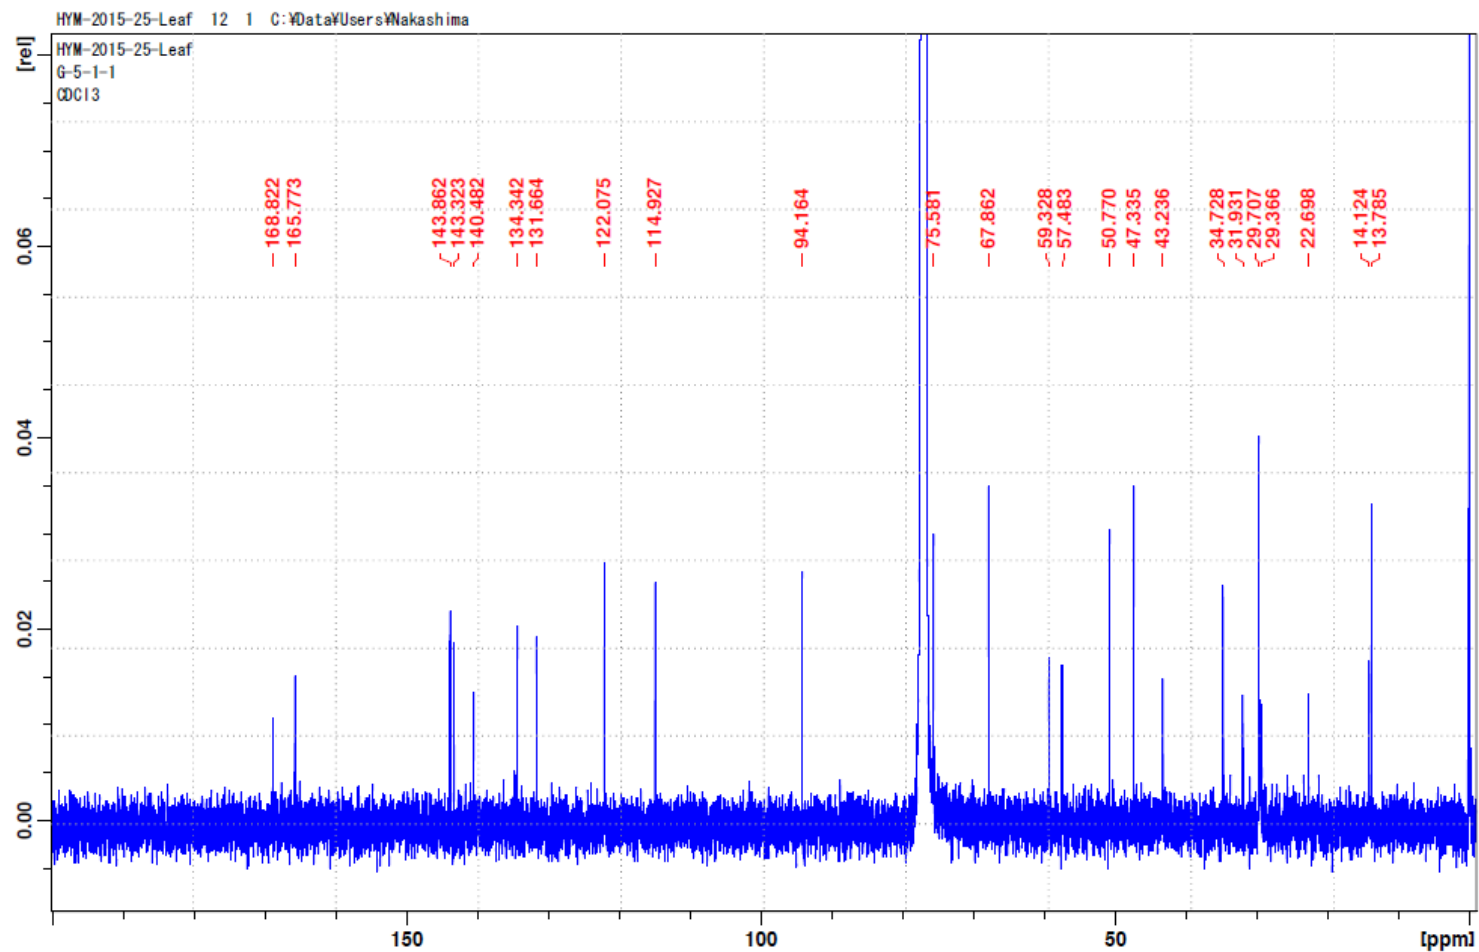

**Figure S63.**  $^1\text{H}$ - $^1\text{H}$  COSY spectrum of **53** (measured in  $\text{CDCl}_3$ , 500 MHz).

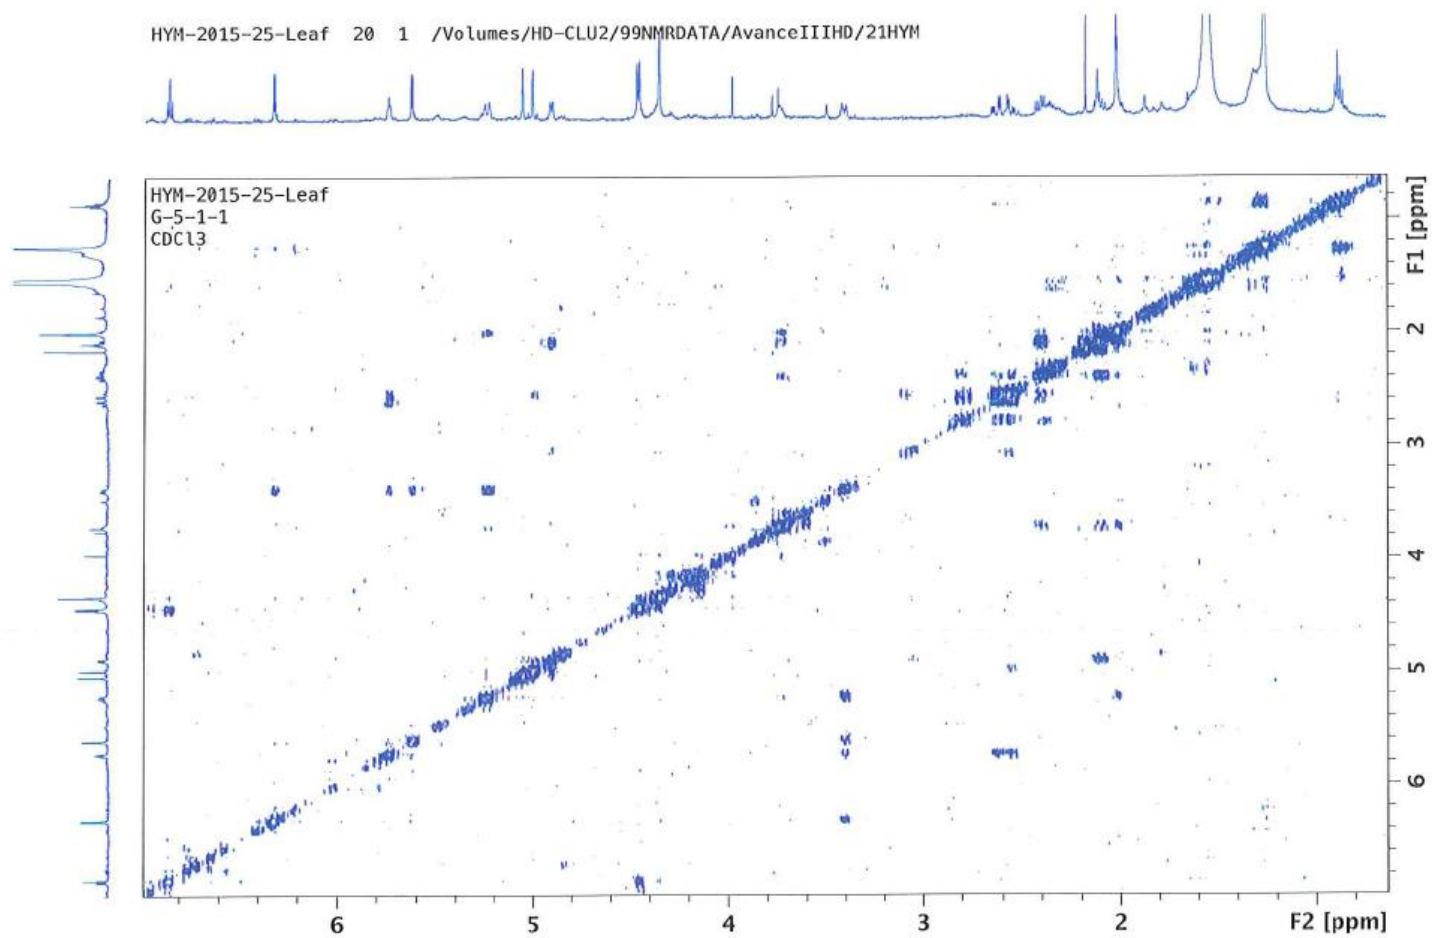

**Figure S64.** HSQC spectrum of **53** (measured in CDCl<sub>3</sub>, 500 MHz).

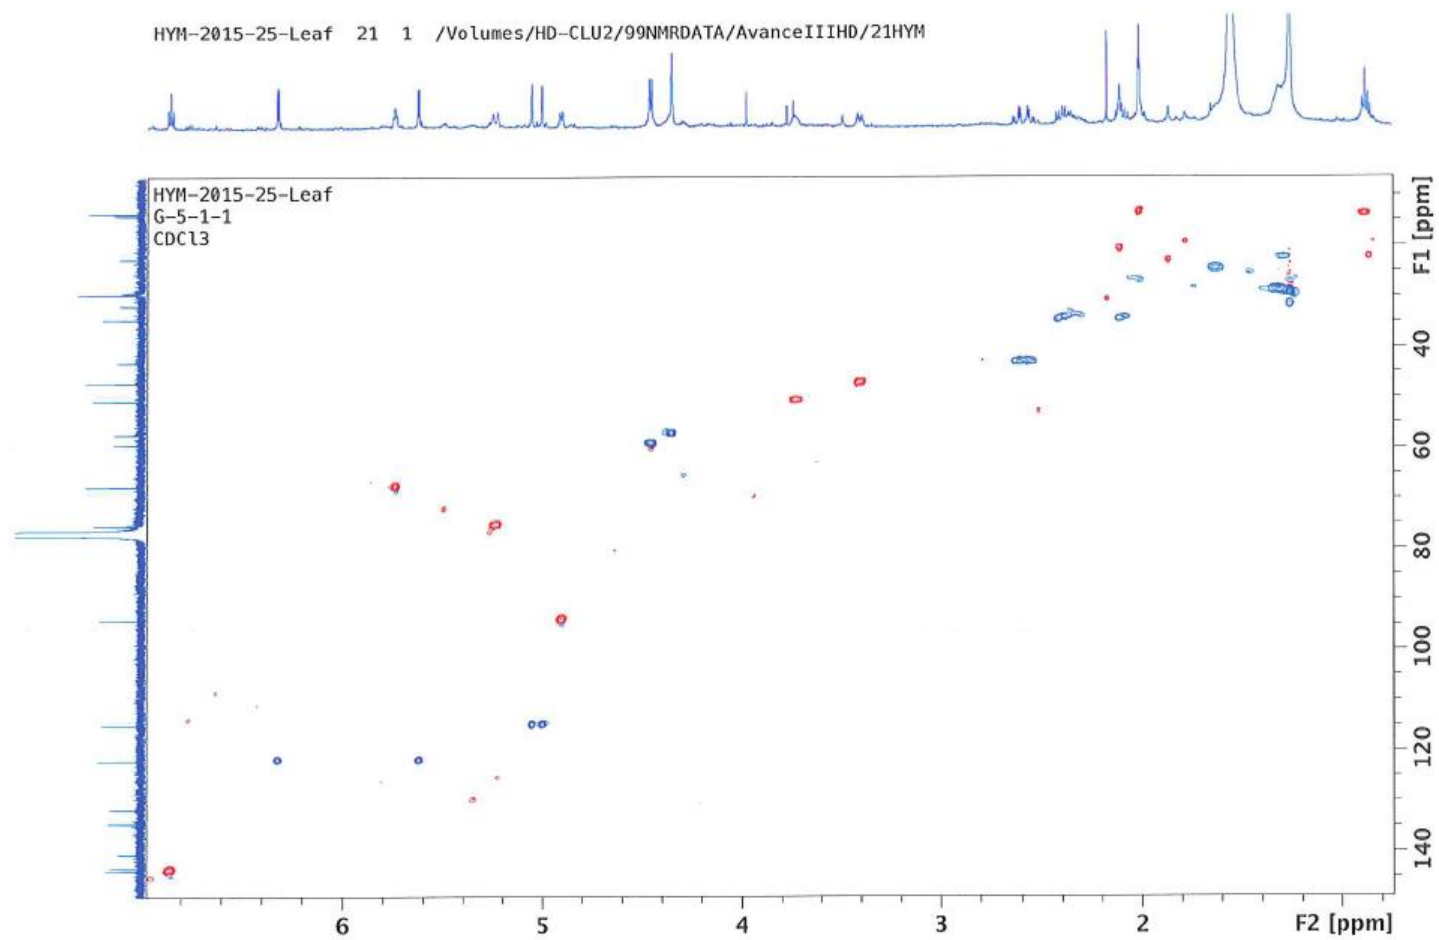



**Figure S65.** HMBC spectrum of **53** (measured in CDCl<sub>3</sub>, 500 MHz).

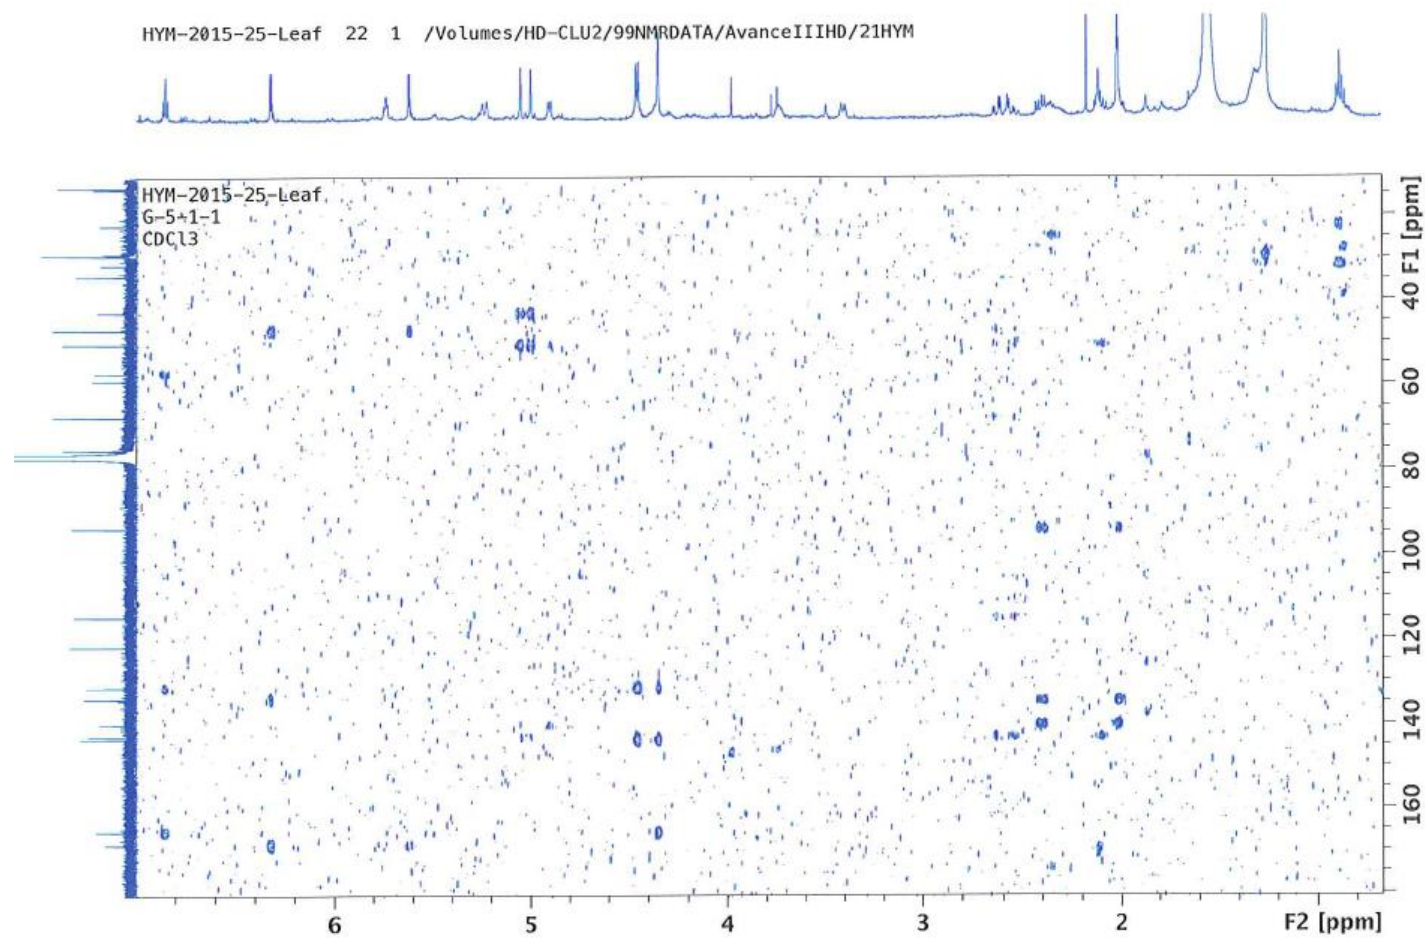

**Figure S66.** NOESY spectrum of **53** (measured in CDCl<sub>3</sub>, 500 MHz).

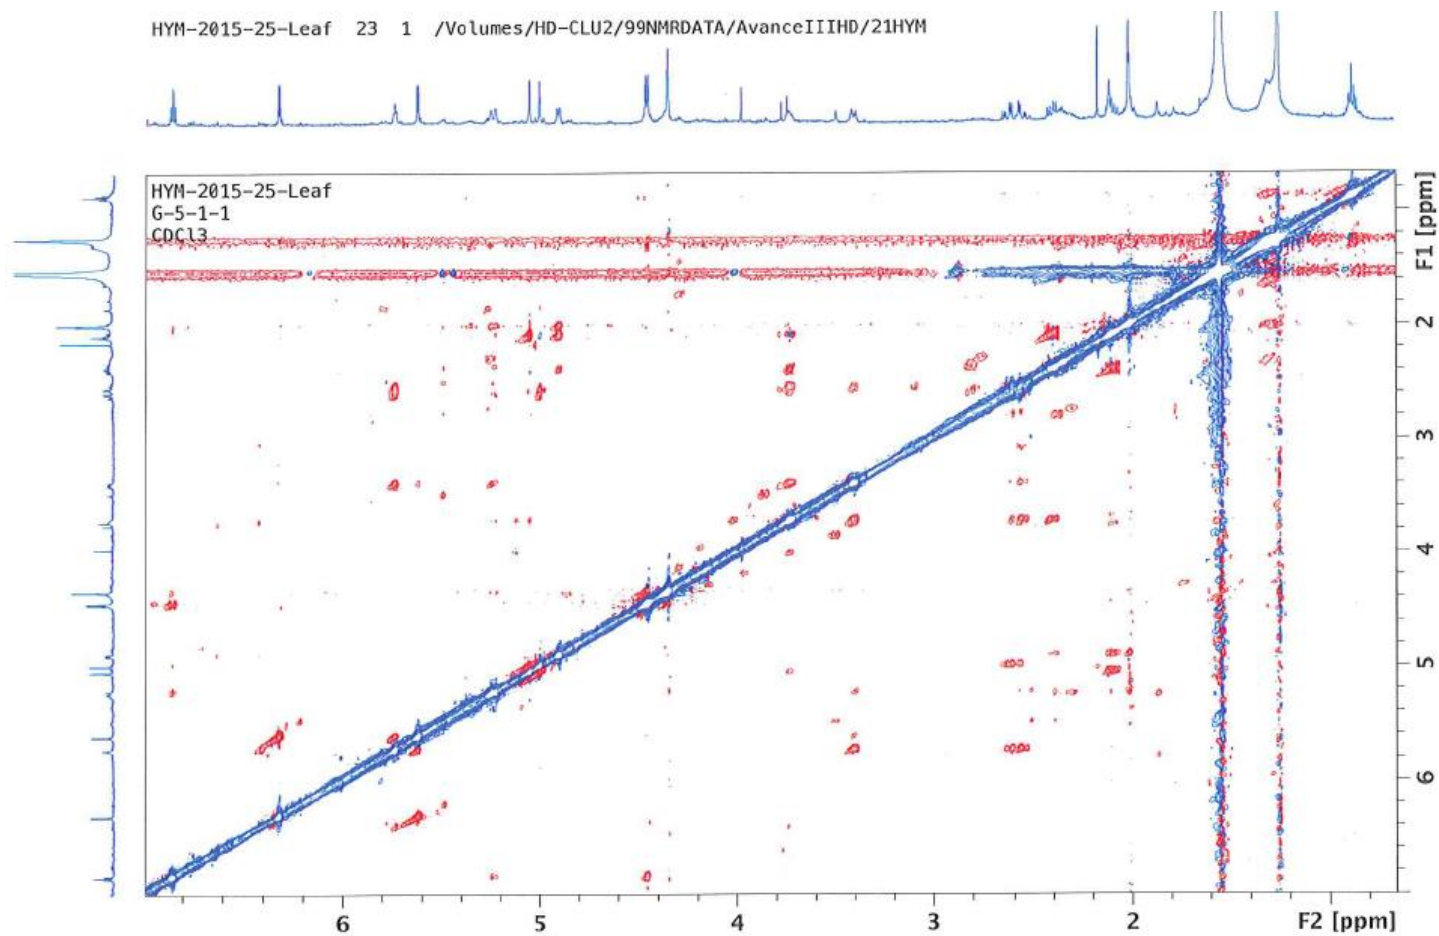

**Figure S67.**  $^1\text{H}$  NMR spectrum of **54** (measured in  $\text{CDCl}_3$ , 500 MHz).

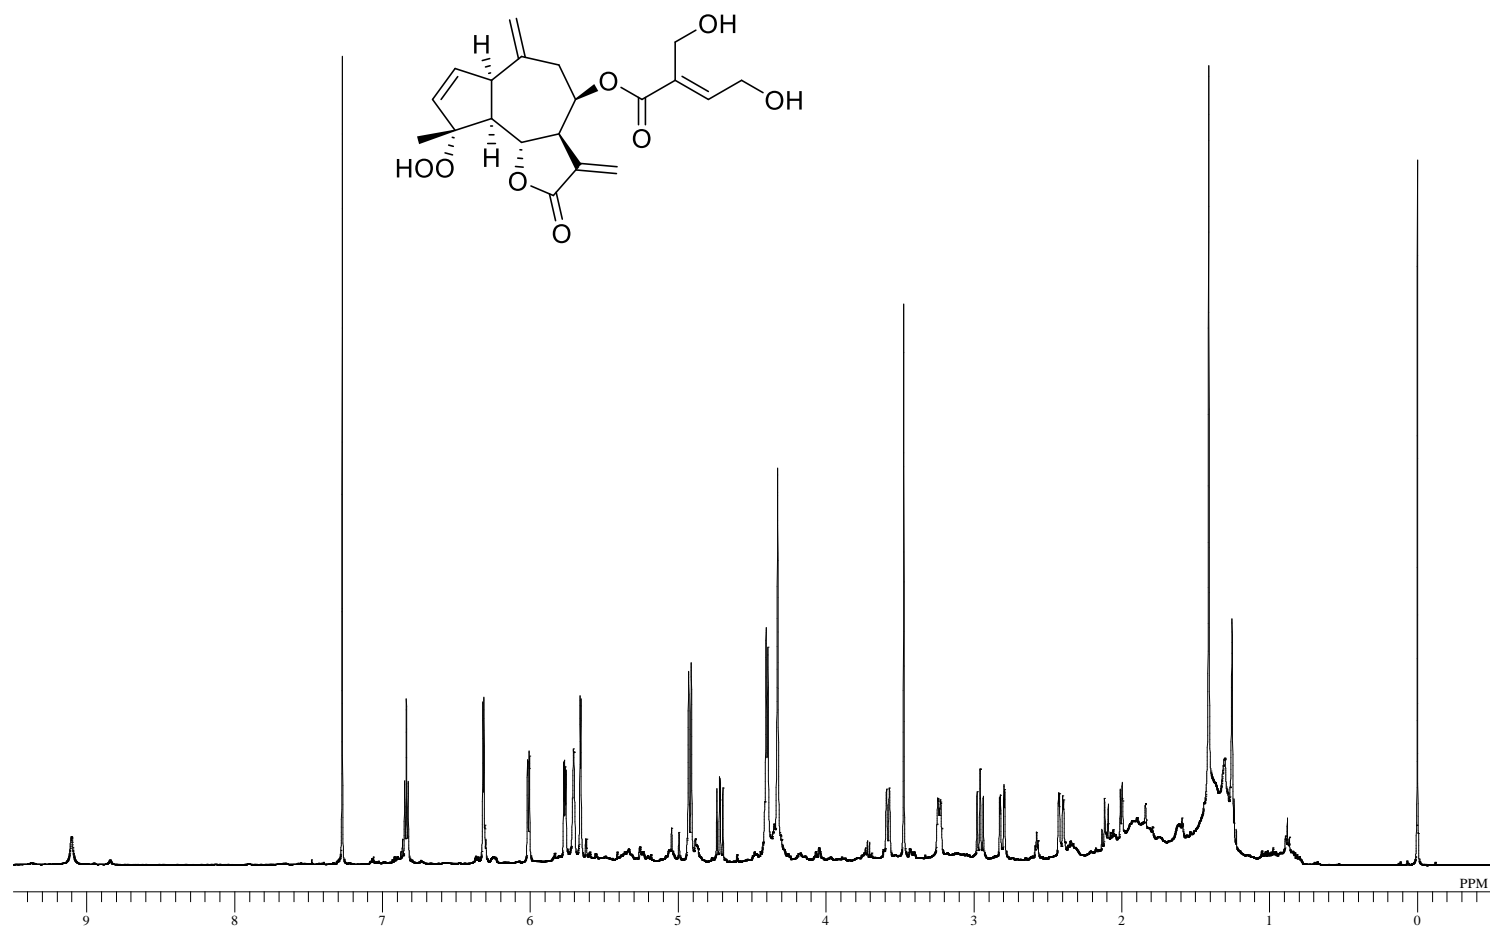

**Figure S68.**  $^{13}\text{C}$  NMR spectrum of **54** (measured in  $\text{CDCl}_3$ , 126 MHz).

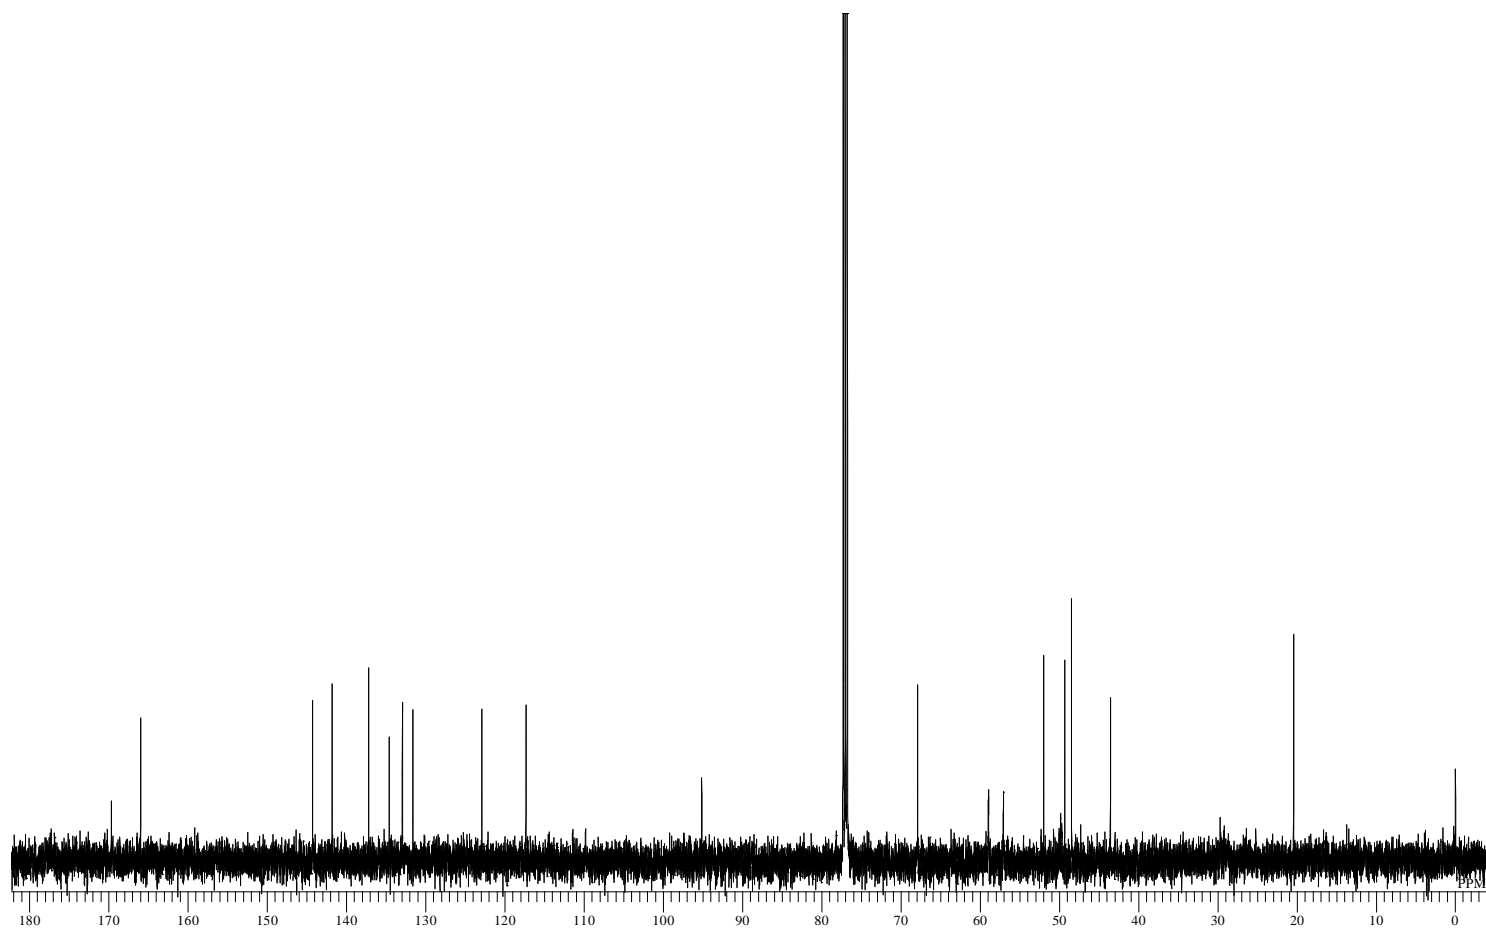

**Figure S69.**  $^1\text{H}$ - $^1\text{H}$  COSY spectrum of **54** (measured in  $\text{CDCl}_3$ , 500 MHz).

HYM-G-6-2-6.8mg-COSY\_cdc13

exp6 gCOSY

| SAMPLE         |             | FLAGS         |    |          |
|----------------|-------------|---------------|----|----------|
| date           | Sep 27 2017 | hs            |    | nn       |
| solvent        | cdcl3       | aspl          |    | y        |
| sample         | haglvi      |               |    | 6180     |
| ACQUISITION    |             | SPECIAL       |    |          |
| av             | 5165.3      | temp          |    | 24.0     |
| at             | 0.150       | gain          |    | 36       |
| np             | 1550        | spin          |    | 0        |
| fb             | 4000        | F2 PROCESSING |    |          |
| ss             | 32          | ab            |    | -0.075   |
| d1             | 1.000       | abs           |    | not used |
| nt             | 4           | fn            |    | 2048     |
| 2D ACQUISITION |             | F1 PROCESSING |    |          |
| sw1            | 5165.3      | sh1           |    | -0.025   |
| ni             | 128         | shel          |    | not used |
| d2             | 0           | procl         |    | lp       |
| PRESATURATION  |             | fn1           |    | 2048     |
| satmode        | n           | DISPLAY       |    |          |
| wet            | n           | sp            |    | -96.0    |
| TRANSMITTER    |             | wp            |    | 4252.3   |
| tn             | H1          | spl           |    | -86.0    |
| sfrq           | 500.484     | wpl           |    | 4302.7   |
| tof            | -178.0      | rfl           |    | 257.5    |
| tpwr           | 58          | rfl           |    | 0        |
| pw             | 7.900       | rfl1          |    | 257.5    |
| GRADIENTS      |             | rfpl          |    | 0        |
| galvle         | 5154        | PLOT          |    |          |
| gtE            | 0.001000    | wc            |    | 206.0    |
| EDratio        | 1.000       | ac            |    | 0        |
| gatab          | 0.000500    | wc2           |    | 206.0    |
| DECOUPLER      |             | ac2           |    | 0        |
| dn             | C13         | vs            |    | 5465     |
| ds             | nnn         | th            |    | 6        |
|                | ai          | cdc           | av |          |

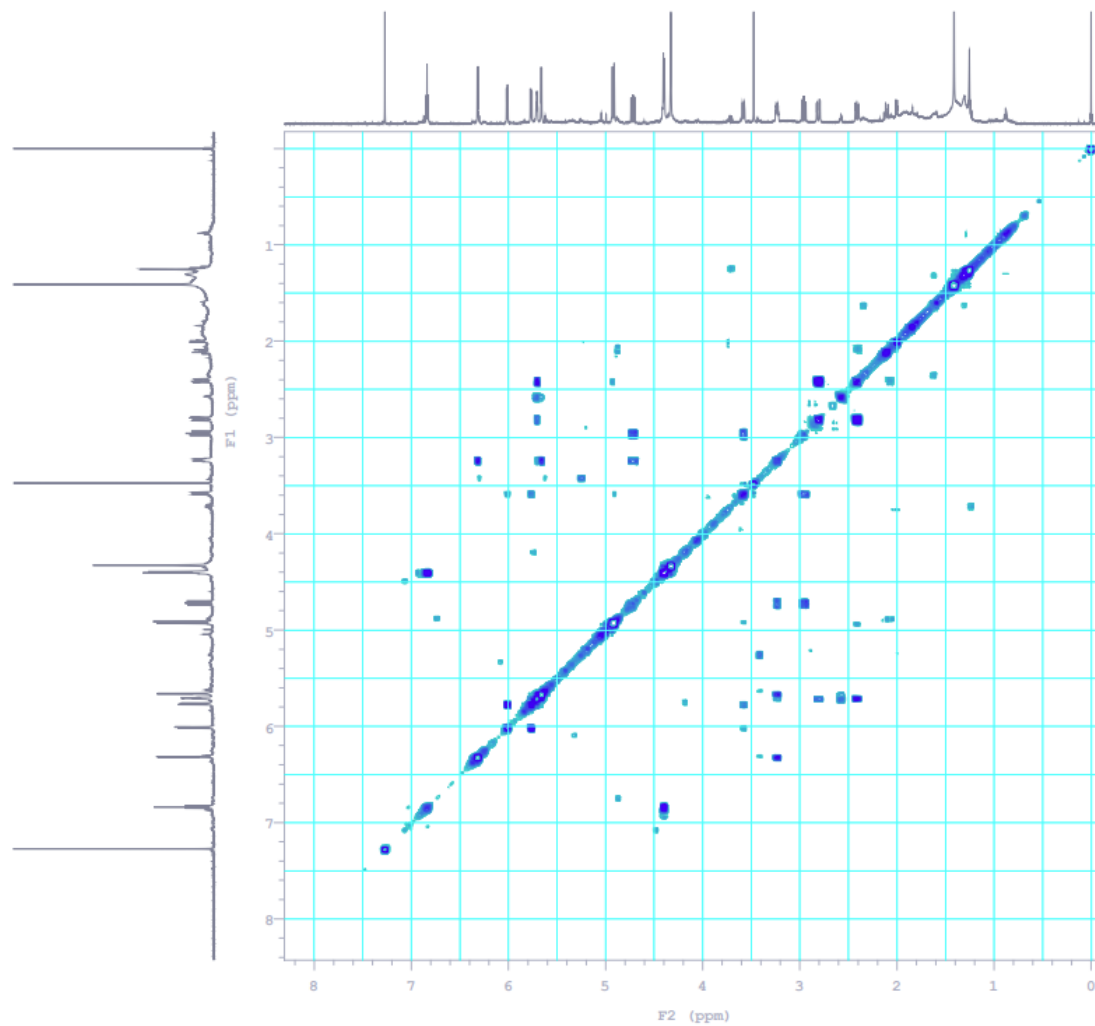

**Figure S70.** HSQC spectrum of **54** (measured in CDCl<sub>3</sub>, 500 MHz).

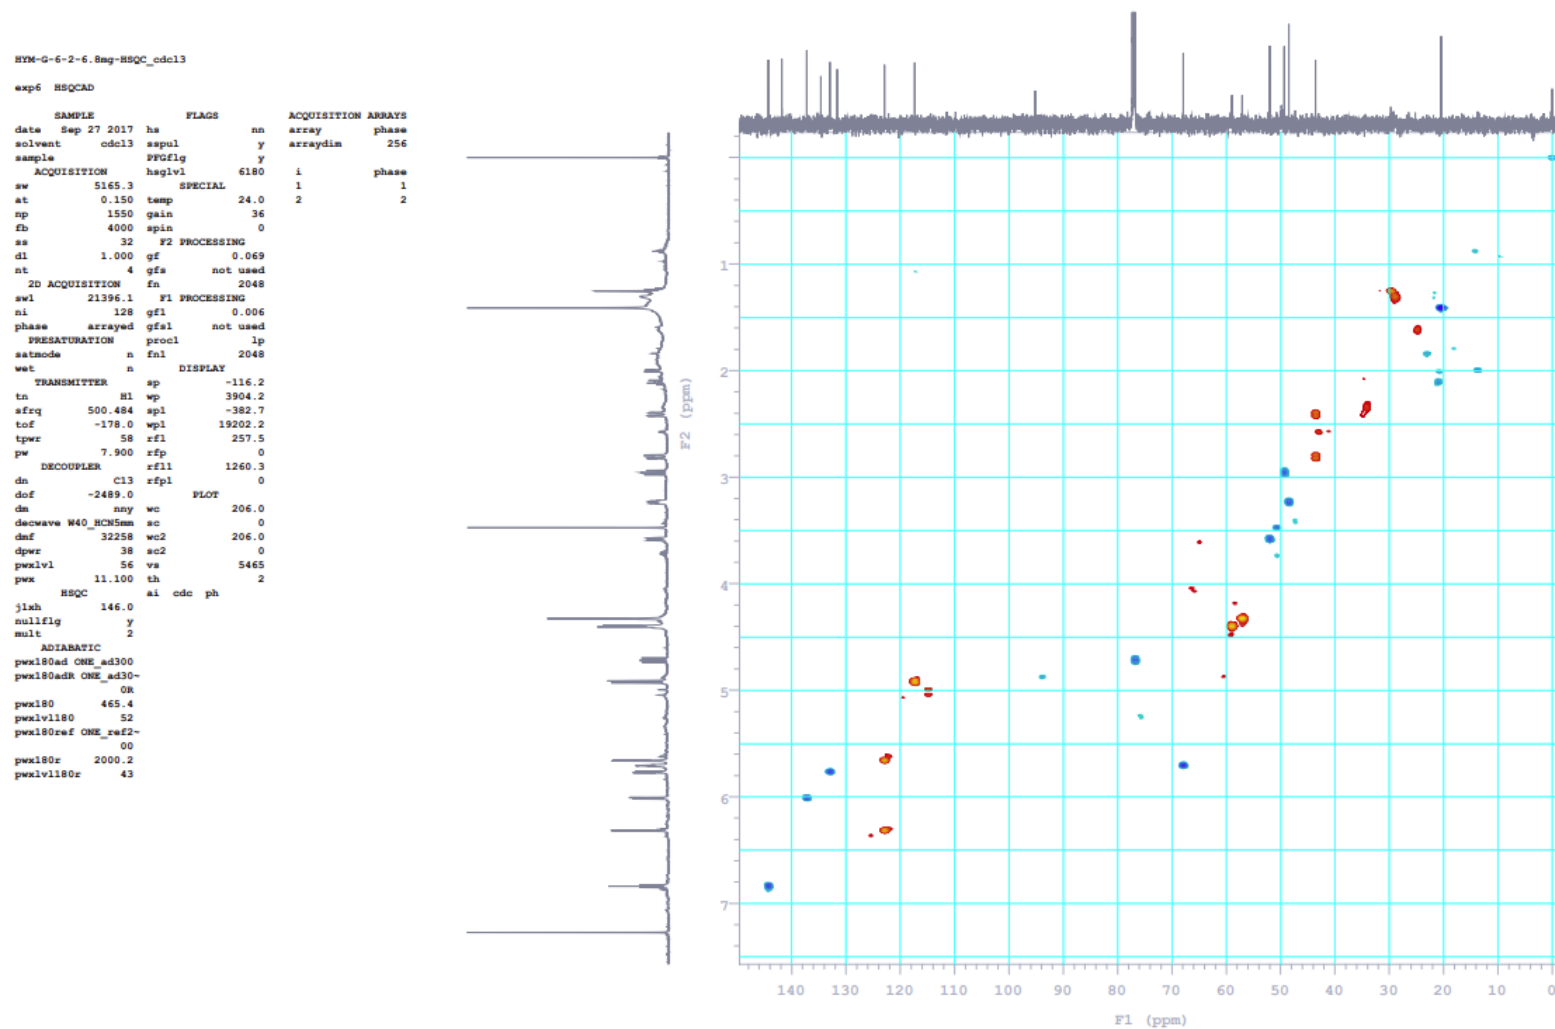

**Figure S71.** HMBC spectrum of **54** (measured in CDCl<sub>3</sub>, 500 MHz).

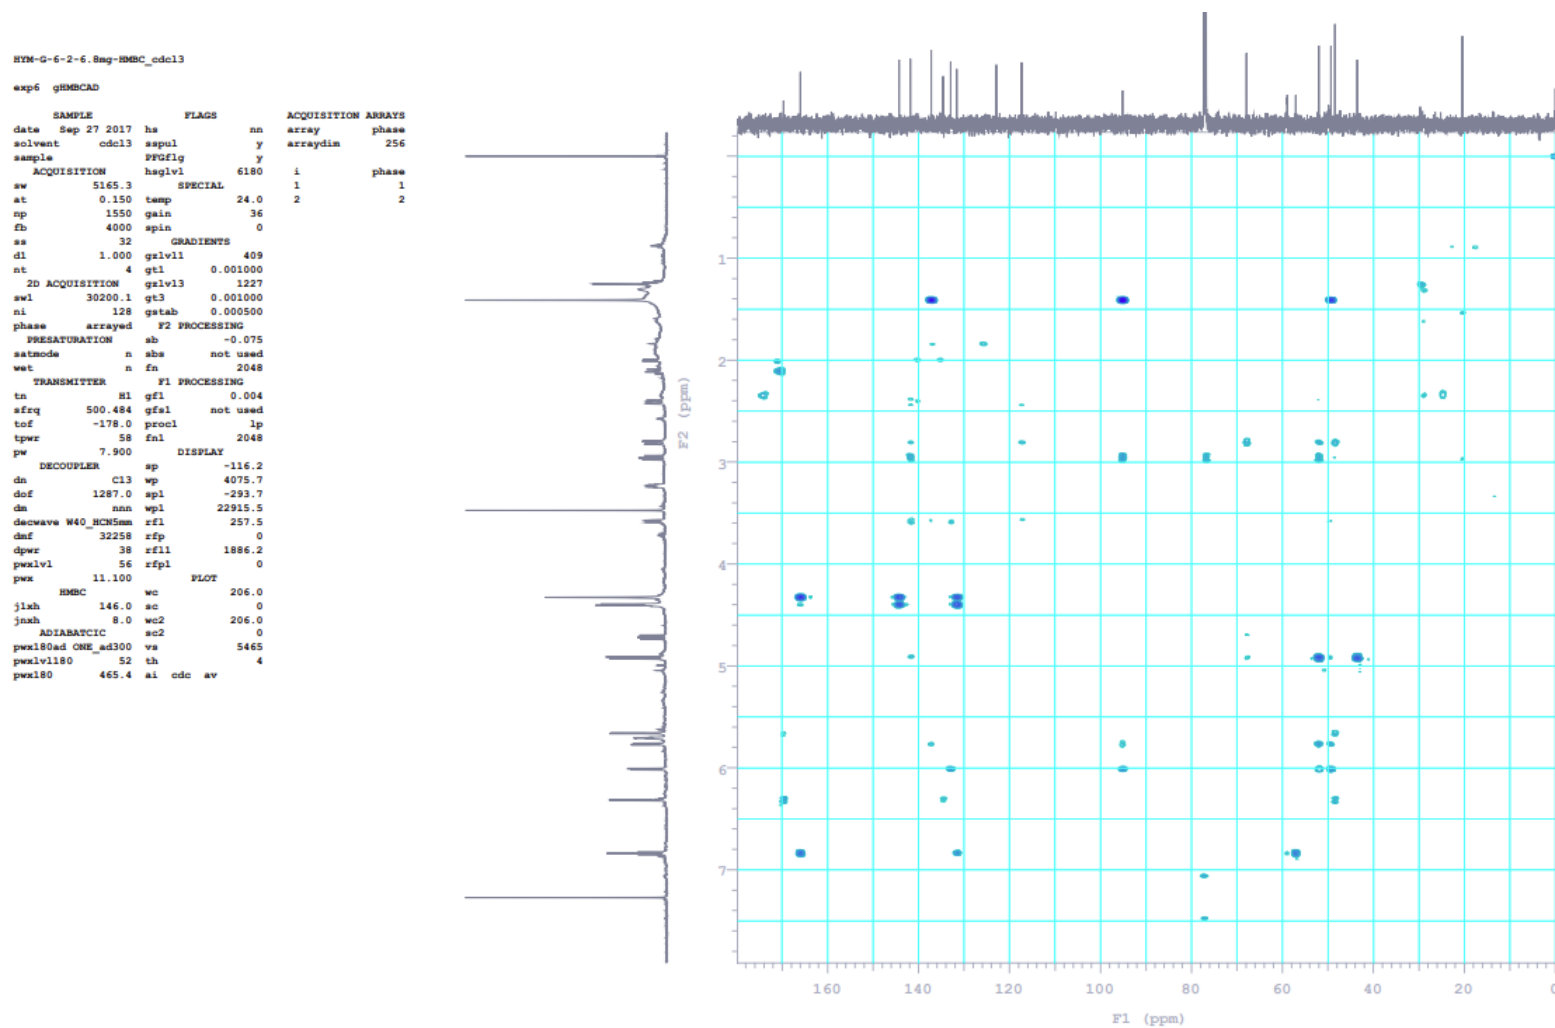

**Figure S72.** NOESY spectrum of **54** (measured in CDCl<sub>3</sub>, 500 MHz).

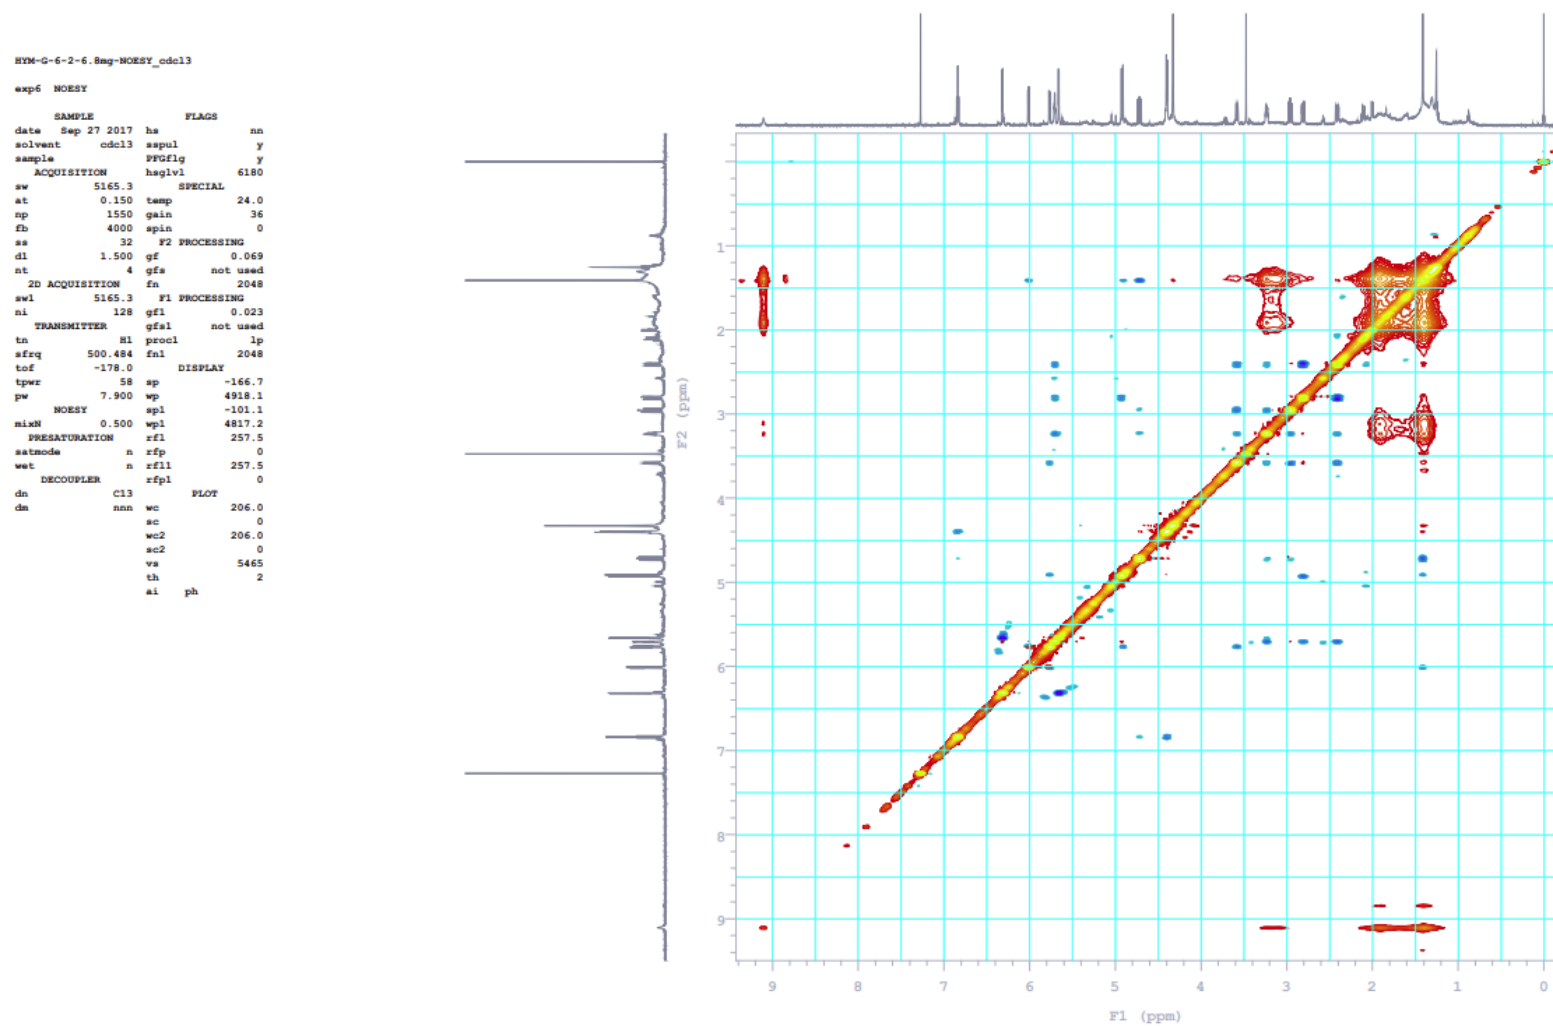



**Figure S73.**  $^1\text{H}$  NMR spectrum of **62** (measured in  $\text{CDCl}_3$ , 500 MHz).

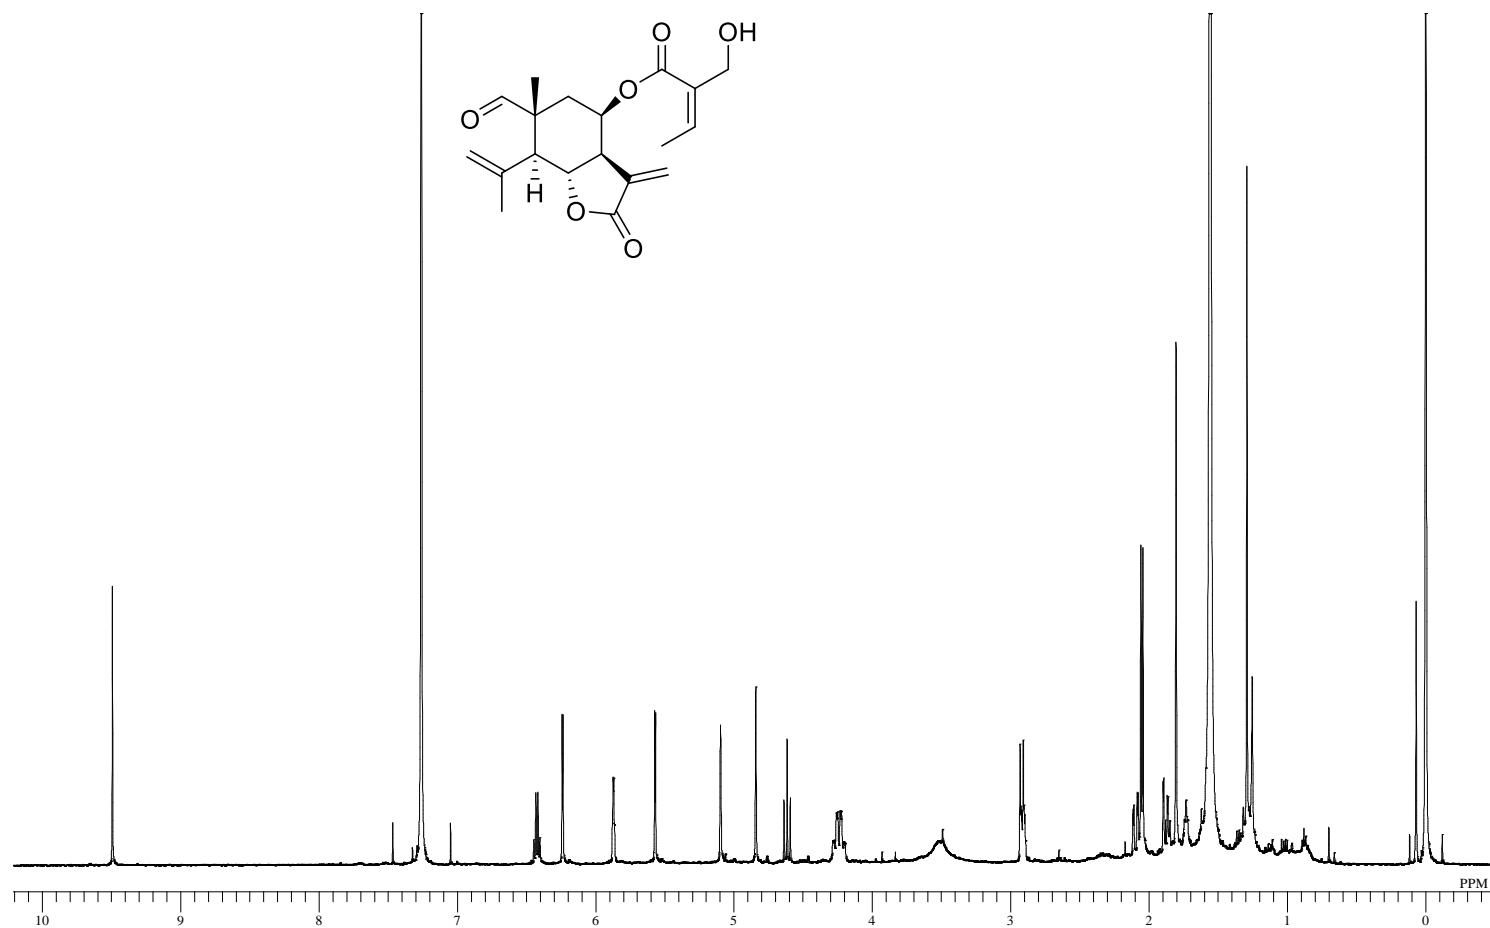

**Figure S74.**  $^{13}\text{C}$  NMR spectrum of **62** (measured in  $\text{CDCl}_3$ , 126 MHz).

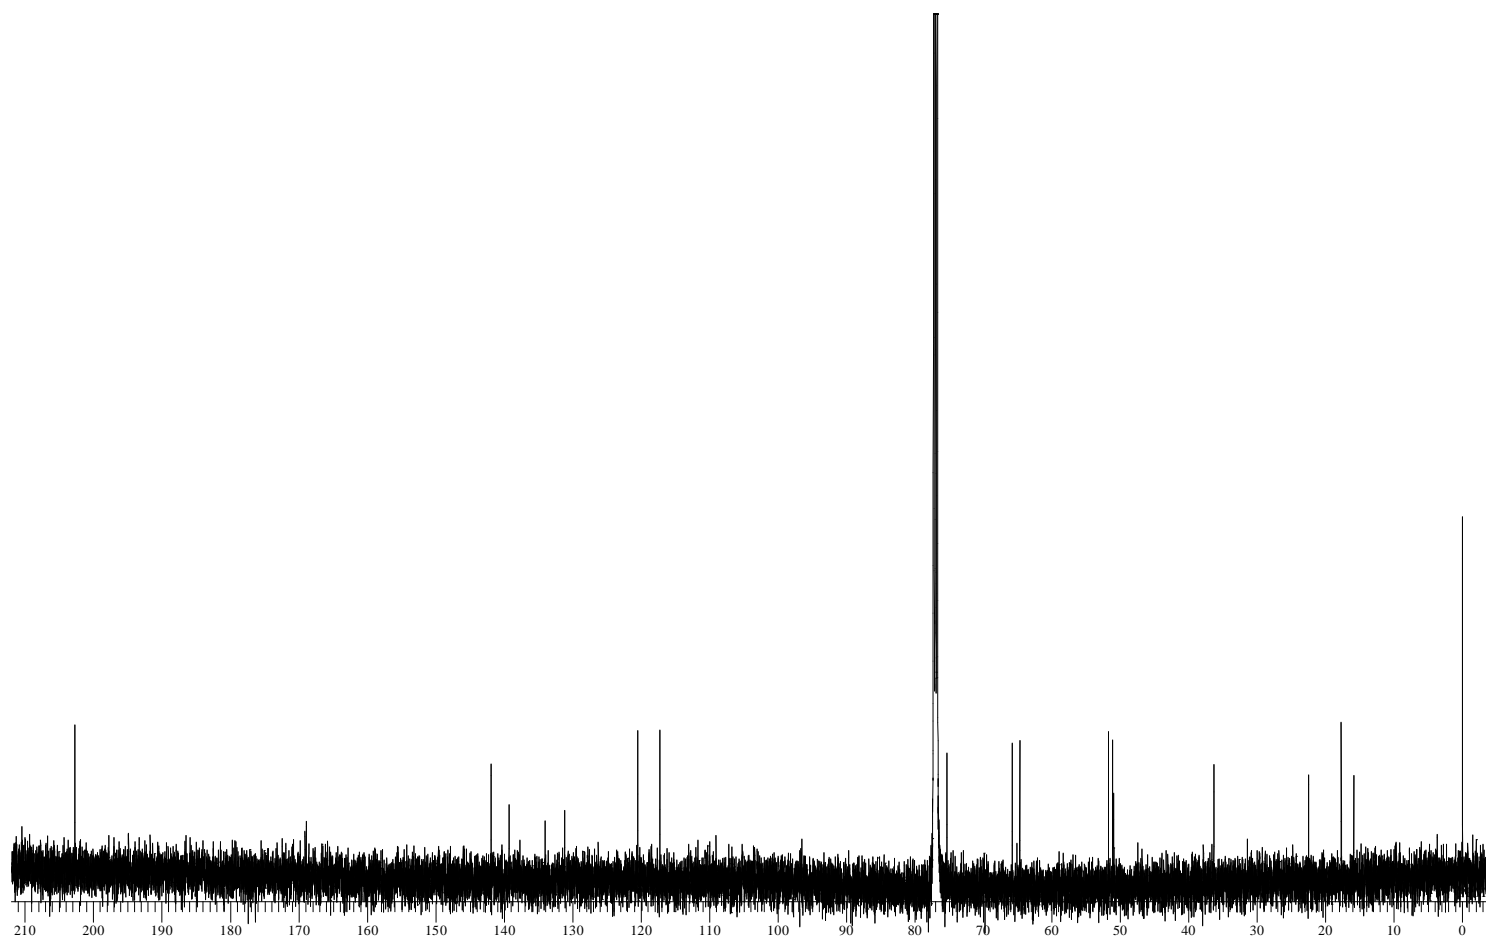

**Figure S75.**  $^1\text{H}$ - $^1\text{H}$  COSY spectrum of **62** (measured in  $\text{CDCl}_3$ , 500 MHz).

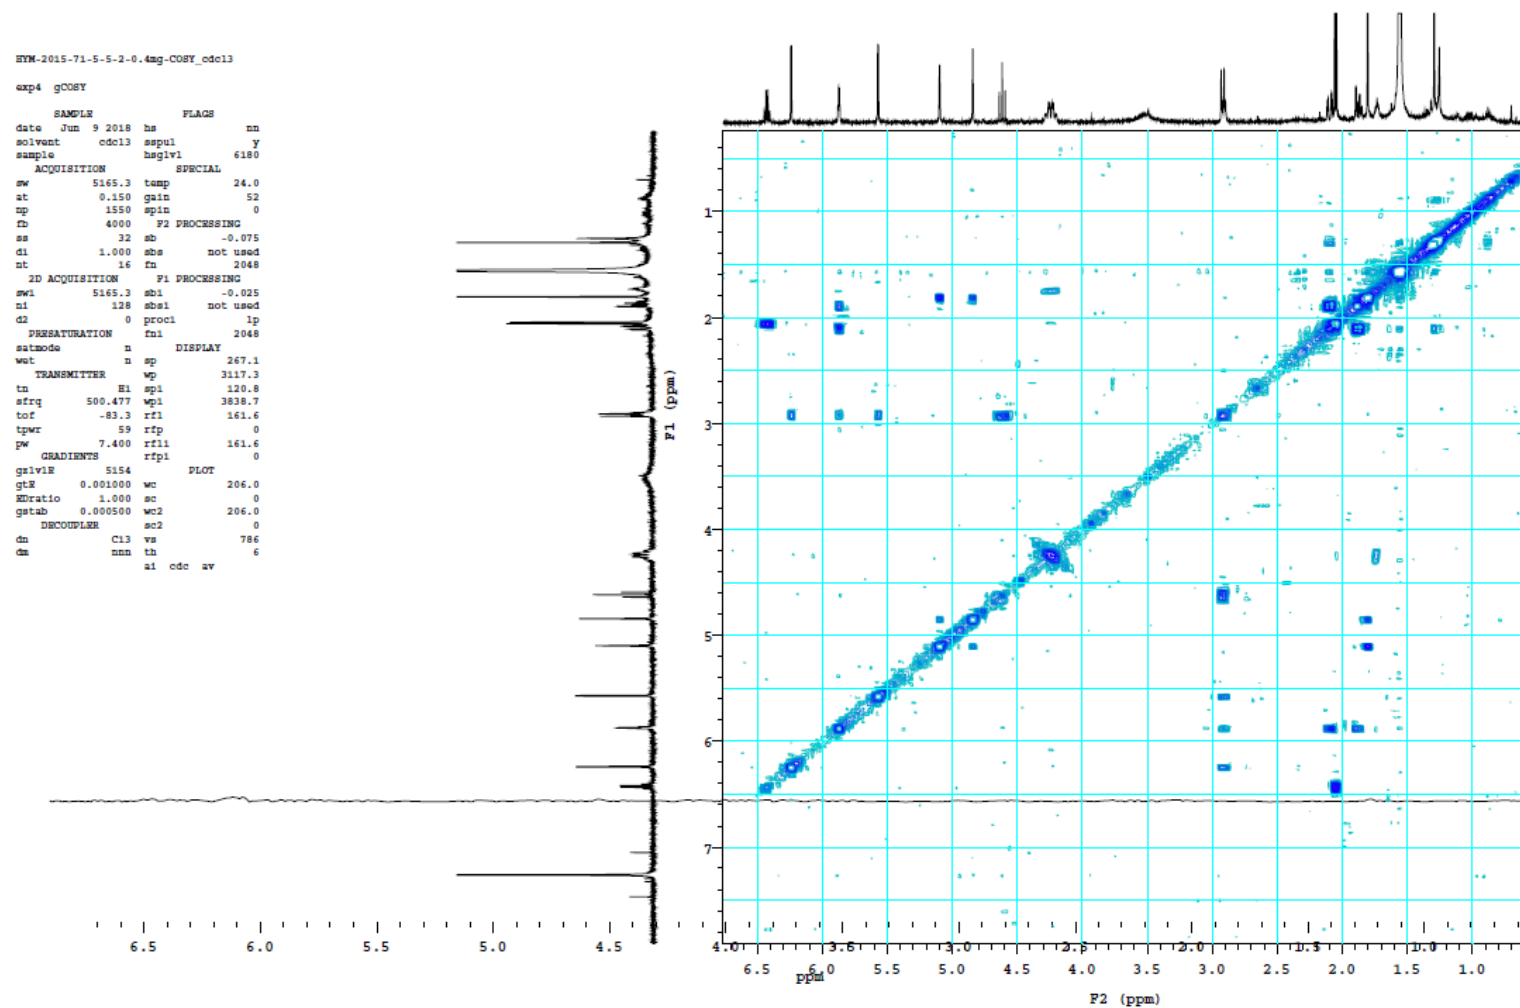

**Figure S76.** HSQC spectrum of **62** (measured in CDCl<sub>3</sub>, 500 MHz).

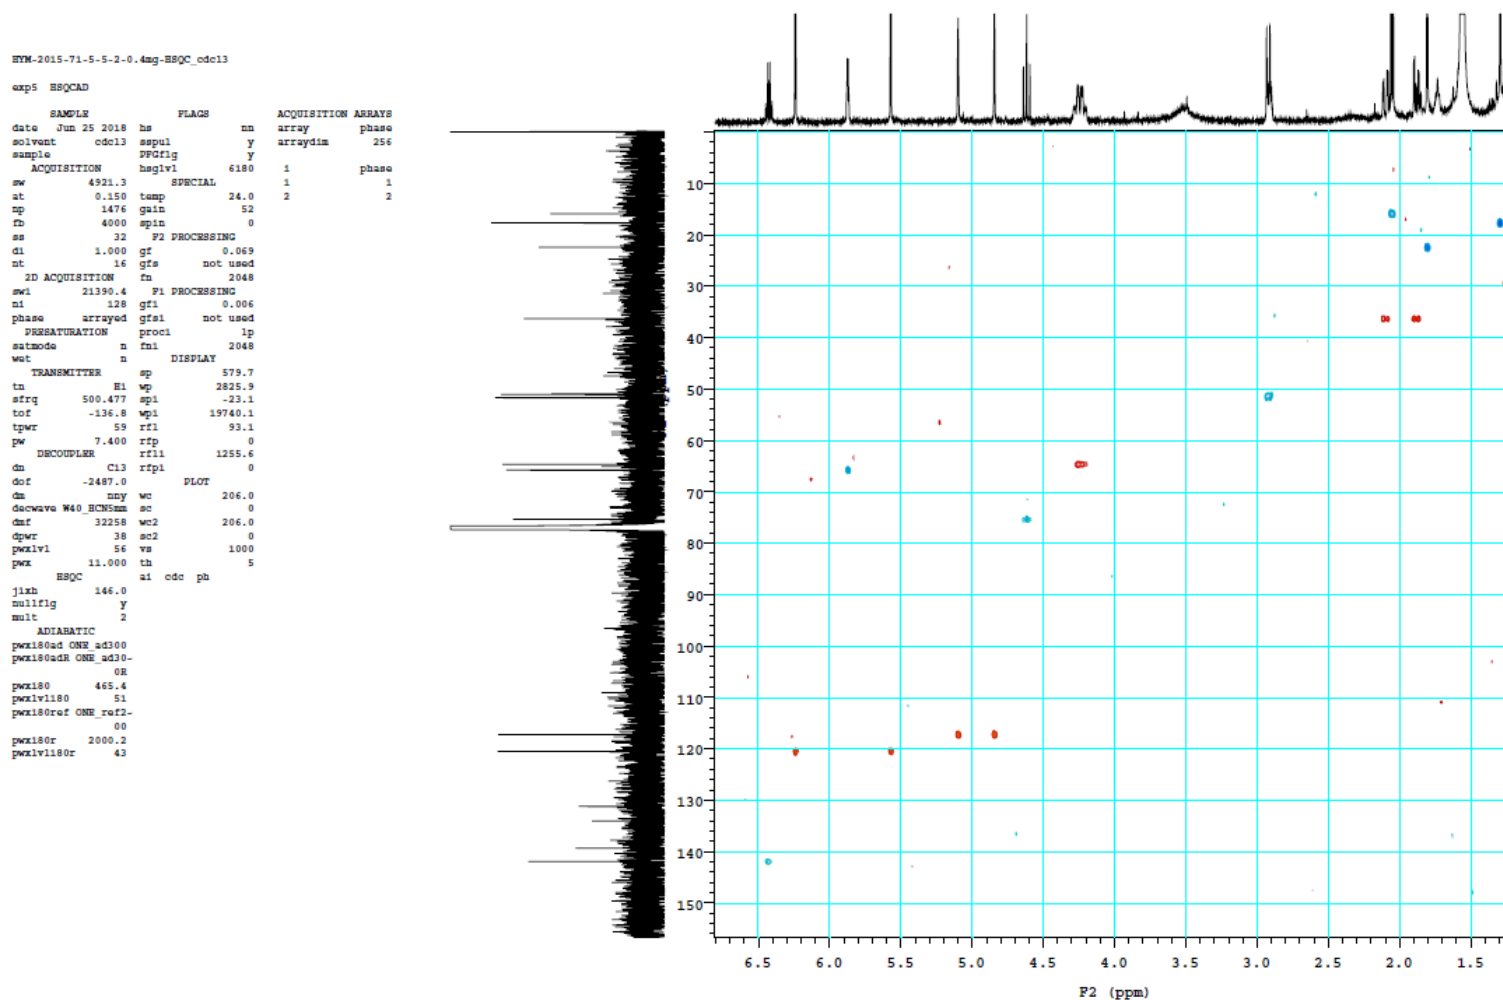

**Figure S77.** HMBC spectrum of **62** (measured in CDCl<sub>3</sub>, 500 MHz).

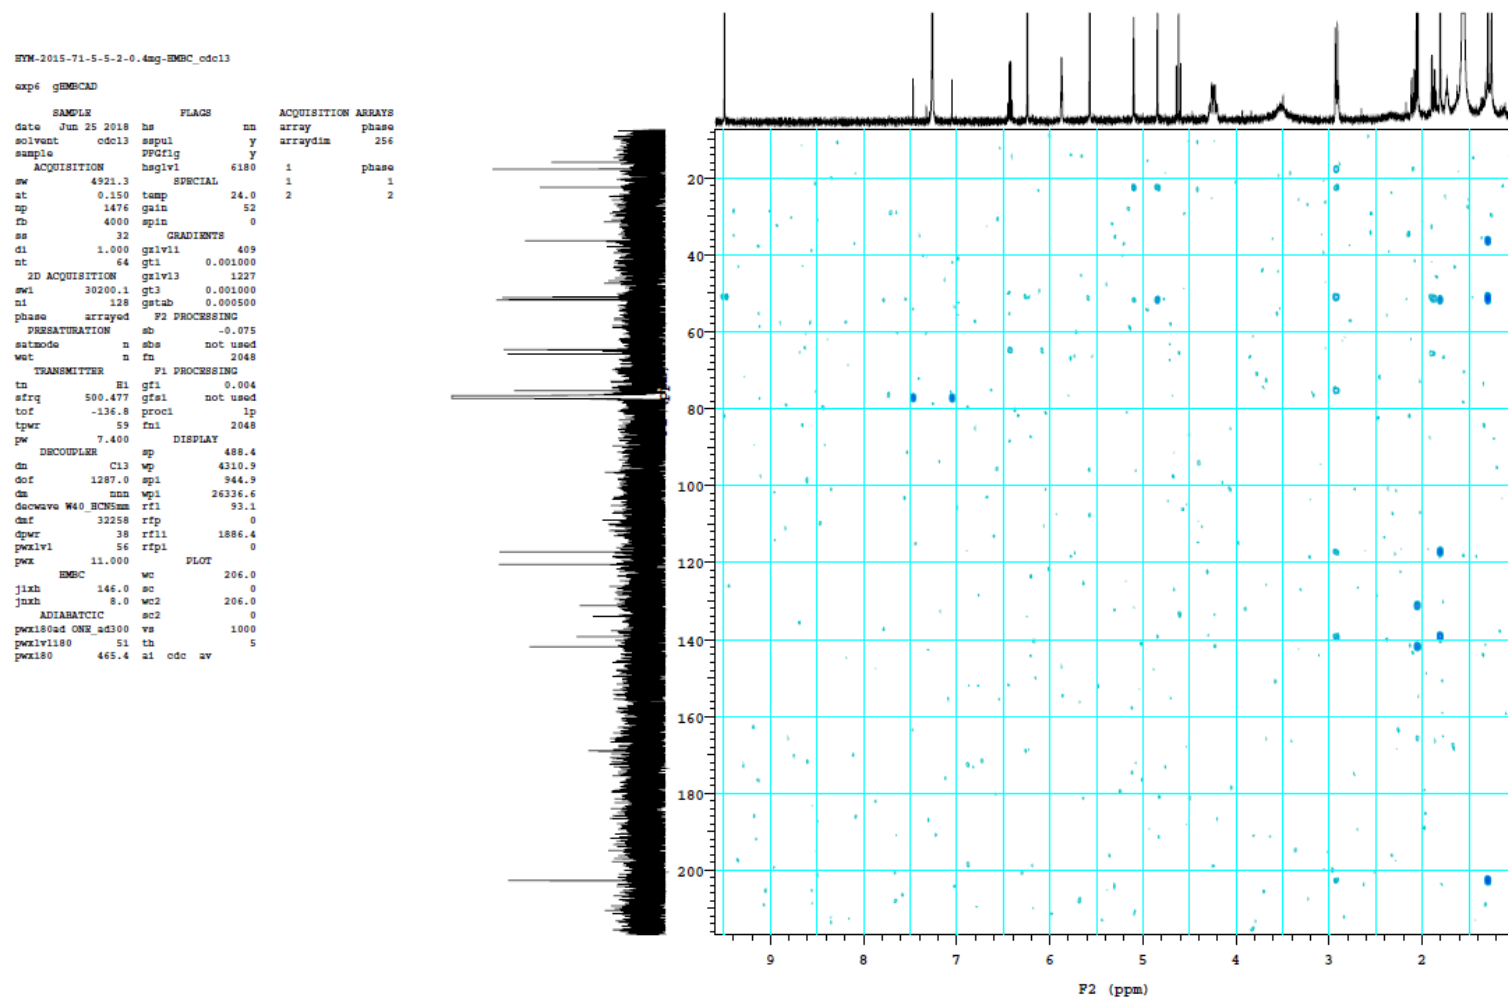

**Figure S78.** NOESY spectrum of **62** (measured in CDCl<sub>3</sub>, 500 MHz).

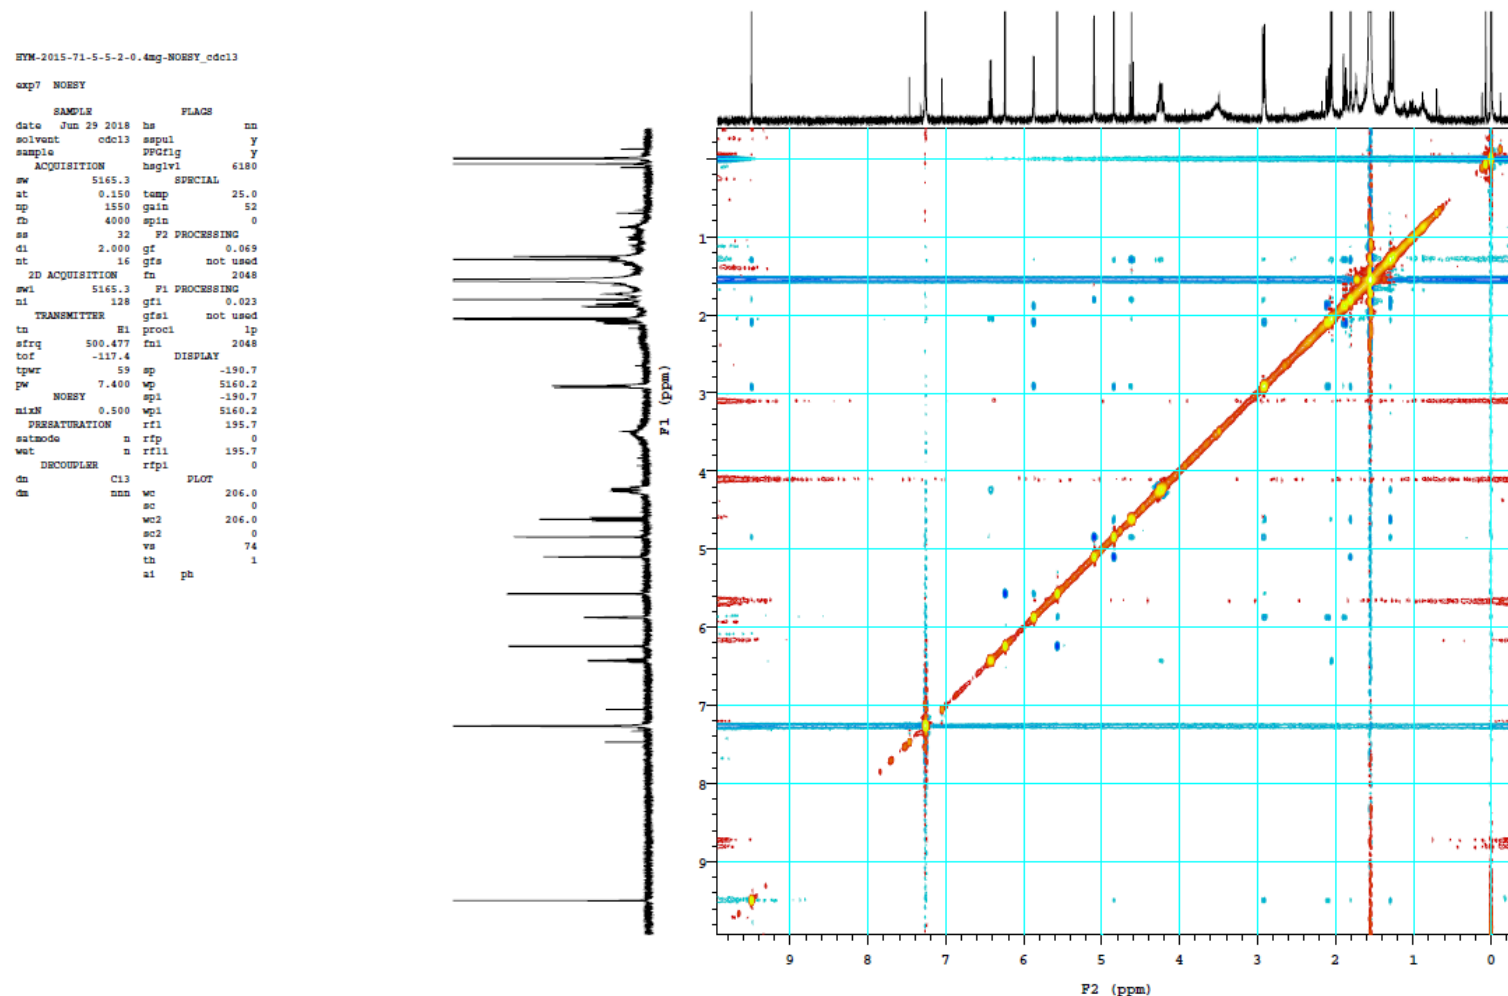

**Figure S79.** Experimental and calculated ECD spectra of **10**.

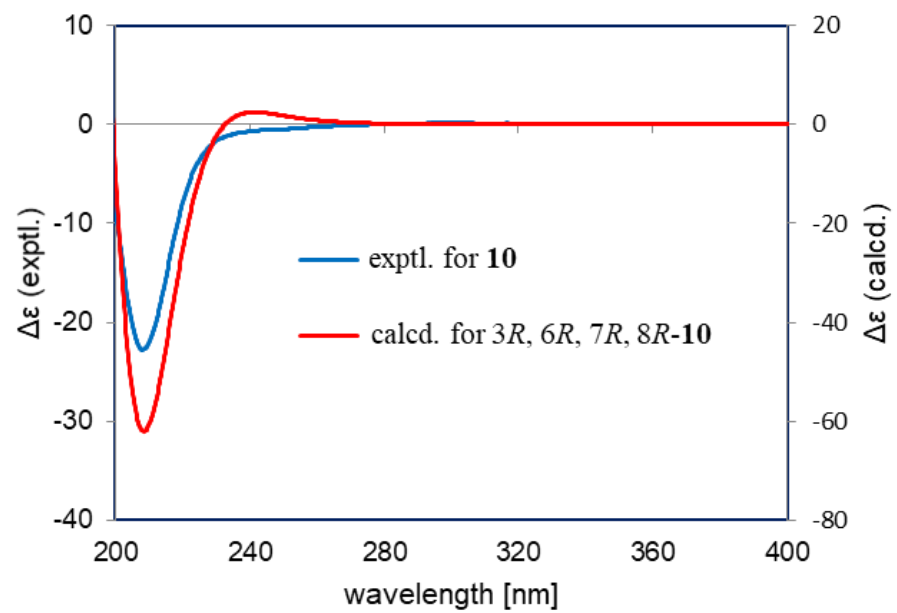

Supplement: s1 [file s1]
